# Supplementary material for: Zerovalent transition-metal inverse-sandwich complexes of a diborataanthracene dianion
Source: Royal Society of Chemistry journal article supplement (doi:10.1039/d6sc02501c), 2026-05-22
Supplement: d6sc02501c1.pdf [file d6sc02501c1.pdf]

## Supporting Information for

# Zerovalent transition-metal inverse-sandwich complexes of a diborataanthracene dianion

Alexander Gerstner,<sup>a,b</sup> Merle Arrowsmith,<sup>a,b</sup> Maximilian Dietz,<sup>a,b</sup> Cornelius Mihm,<sup>a,b</sup> Holger Braunschweig<sup>\*a,b</sup>

<sup>a</sup> *Institute for Inorganic Chemistry, Julius-Maximilians-Universität Würzburg, Am Hubland, 97074 Würzburg, Germany.*

<sup>b</sup> *Institute for Sustainable Chemistry & Catalysis with Boron, Julius-Maximilians-Universität Würzburg, Am Hubland, Germany.*

## Contents

|                                                   |    |
|---------------------------------------------------|----|
| General methods.....                              | 2  |
| Synthetic procedures .....                        | 3  |
| NMR spectra of isolated compounds .....           | 8  |
| IR spectra.....                                   | 55 |
| UV-vis spectra .....                              | 61 |
| Cyclic voltammetry .....                          | 68 |
| X-ray crystallographic data .....                 | 69 |
| Computational details.....                        | 79 |
| Cartesian coordinates of optimised compounds..... | 84 |
| References .....                                  | 97 |

## General methods

All manipulations were performed either under an atmosphere of dry argon or *in vacuo* using standard Schlenk line or glovebox techniques. Deuterated solvents were dried over molecular sieves and degassed by three freeze-pump-thaw cycles prior to use. All other solvents were distilled and degassed from appropriate drying agents. Both deuterated and non-deuterated solvents were stored under argon over activated 4 Å molecular sieves. Liquid-phase NMR spectra were acquired on a Bruker Avance 400 spectrometer ( $^{11}\text{B}$ : 128.5 MHz), on a Bruker Avance 500 spectrometer ( $^1\text{H}$ : 500.1 MHz,  $^{11}\text{B}$ : 160.5 MHz,  $^{13}\text{C}$ : 125.8 MHz,  $^7\text{Li}$ : 194.4 MHz) or a Bruker Avance Neo I 600 spectrometer ( $^1\text{H}$ : 600.2 MHz,  $^{13}\text{C}$ : 150.9 MHz,  $^7\text{Li}$ : 233.3 MHz). Chemical shifts ( $\delta$ ) are provided in ppm and internally referenced to the carbon nuclei ( $^{13}\text{C}\{^1\text{H}\}$ ) or residual protons ( $^1\text{H}$ ) of the solvent. Heteronuclei NMR spectra are referenced to external standards ( $^{11}\text{B}$ :  $\text{BF}_3\cdot\text{OEt}_2$ ,  $^7\text{Li}$ :  $\text{LiCl}$ ). NMR splitting patterns are given as singlet (s) or multiplet (m). High-resolution mass spectrometry (HRMS) data were obtained from a Thermo Scientific Exactive Plus spectrometer. UV-vis spectra were acquired on a METTLER TOLEDO UV-vis-Excellence UV5 spectrophotometer. Solid-state IR spectra were recorded on a Bruker FT-IR spectrometer ALPHA II inside a glovebox. Cyclic voltammetry experiments were performed using a Gamry Instruments Reference 600 potentiostat. A standard three-electrode cell configuration was employed using a platinum disk working electrode, a platinum wire counter electrode, and a silver wire, separated by a Vycor tip, serving as the reference electrode. Formal redox potentials are referenced to the ferrocene/ferrocenium ( $[\text{Cp}_2\text{Fe}]^{+/0}$ ) redox couple. Tetra(*n*-butyl)ammonium hexafluorophosphate ( $[\text{nBu}_4\text{N}][\text{PF}_6]$ ) was employed as the supporting electrolyte. Compensation for resistive losses (*iR* drop) was employed for all measurements. Solvents and reagents were purchased from Sigma-Aldrich. 4,5-bis(trimethylsilyl)-1,2-dimethylbenzene<sup>1</sup> and  $[(\text{MeCN})_3\text{M}(\text{CO})_3]$  ( $\text{M} = \text{Cr}, \text{Mo}, \text{W}$ )<sup>2</sup> were synthesized using literature procedures.

## Synthetic procedures

### Compound 1

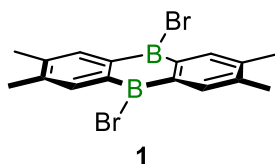

To a solution of 4,5-bis(trimethylsilyl)-1,2-dimethylbenzene (5.89 g, 23.5 mmol, 1.00 equiv.) in hexane (15 mL) in a thick-walled flask fitted with a Young valve,  $\text{BBr}_3$  (13.0 g, 51.7 mmol, 4.91 mL, 2.20 equiv.) was slowly added via syringe while stirring. The reaction mixture was heated to 120 °C for 72 h. After cooling to rt, all volatiles were removed *in vacuo*. The crude product was washed with hexane (6 x 10 mL) and dried, yielding compound **1** as a yellow solid (2.33 g, 5.98 mmol, 51%). Single crystals suitable for X-ray diffraction were obtained by slow evaporation of a saturated solution of **1** in benzene at rt.  $^1\text{H}$  NMR (500.1 MHz,  $\text{CD}_2\text{Cl}_2$ ):  $\delta$  = 8.10 (s, 4H, Ar-CH), 2.39 (s, 12H,  $\text{CH}_3$ ) ppm.  $^{13}\text{C}\{^1\text{H}\}$  NMR (125.8 MHz,  $\text{CD}_2\text{Cl}_2$ ):  $\delta$  = 144.2 (Ar-CMe), 140.7 (Ar-CB), 140.3 (Ar-CH), 20.3 ( $\text{CH}_3$ ) ppm.  $^{11}\text{B}$  NMR (160.5 MHz,  $\text{CD}_2\text{Cl}_2$ ):  $\delta$  = 62.5 (s, br) ppm. HRMS LIFDI ( $m/z$ ) for  $[\text{C}_{16}\text{H}_{16}\text{B}_2\text{Br}_2]^+ = [\text{M}]^+$ : calc. 389.9779; found 389.9777.

### Compound 2

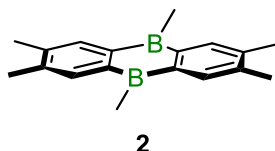

To a suspension of **1** (500 mg, 1.28 mmol, 1.00 equiv.) in toluene (25 mL) at -78 °C was slowly added a solution of  $\text{MeMgBr}$  in  $\text{Et}_2\text{O}$  (3.00 M, 2.69 mmol, 0.87 mL, 2.05 equiv.) via syringe while stirring. The reaction mixture was allowed to warm to rt and stirred for 16 h, generating a colourless precipitate. After filtration through celite the filtrate was dried *in vacuo*, yielding **2** as a colourless solid (323 mg, 1.24 mmol, 97%). Single crystals suitable for X-ray diffraction were obtained by slow evaporation of a saturated solution of **2** in benzene at rt. NMR data was collected in two different solvents ( $\text{C}_6\text{D}_6$ ,  $d_8$ -THF) for comparative purposes with subsequent metal complexes.  $^1\text{H}$  NMR (500.1 MHz,  $\text{C}_6\text{D}_6$ ):  $\delta$  = 7.95 (s, 4H, Ar-CH), 2.11 (s, 12H,  $\text{CCH}_3$ ), 1.47 (s, 6H,  $\text{BCH}_3$ ) ppm.  $^{13}\text{C}\{^1\text{H}\}$  NMR (125.8 MHz,  $\text{C}_6\text{D}_6$ ):  $\delta$  = 144.1 (Ar-CB), 141.0 (Ar-CMe), 137.8 (Ar-CH), 20.0 ( $\text{CCH}_3$ ), 5.8 ( $\text{BCH}_3$ ) ppm.  $^{11}\text{B}\{^1\text{H}\}$  NMR (160.5 MHz,  $\text{C}_6\text{D}_6$ ):  $\delta$  = 67.2 (s, br) ppm.  $^1\text{H}$  NMR (500.1 MHz,  $d_8$ -THF):  $\delta$  = 7.78 (s, 4H, Ar-CH), 2.33 (s, 12H,  $\text{CCH}_3$ ), 1.17 (s, 6H,  $\text{BCH}_3$ ) ppm.  $^{13}\text{C}\{^1\text{H}\}$  NMR (125.8 MHz,  $d_8$ -THF):  $\delta$  = 145.7 (Ar-CB), 139.8 (Ar-CMe), 136.9 (Ar-CH), 19.9 ( $\text{CCH}_3$ ), 5.5 ( $\text{BCH}_3$ ) ppm.  $^{11}\text{B}\{^1\text{H}\}$  NMR (128.5 MHz,  $d_8$ -THF):  $\delta$  = 58.3 (s, br) ppm. HRMS LIFDI ( $m/z$ ) for  $[\text{C}_{16}\text{H}_{16}\text{B}_2\text{Br}_2]^+ = [\text{M}]^+$ : calc. 260.1902; found 260.1901.

### Complex 3

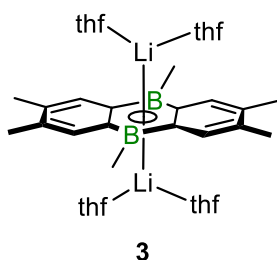

To a solution of **2** (10.0 mg, 38.5  $\mu\text{mol}$ , 1.00 equiv.) in  $d_8$ -THF (0.5 mL) was added lithium sand (5.34 mg, 770  $\mu\text{mol}$ , 20.0 equiv.). Upon stirring the mixture instantly turned pink, and after one minute, red. After stirring for 1 h at rt, and subsequent filtration, NMR-spectroscopic analysis revealed quantitative conversion to the dianion **3**. Single crystals suitable for X-ray diffraction were obtained by diffusion of hexane into a saturated solution of **3** in THF at  $-30\text{ }^\circ\text{C}$ .  $^1\text{H}$  NMR (500.1 MHz,  $d_8$ -THF):  $\delta = 7.95$  (s, 4H, Ar-CH), 2.29 (s, 12H,  $\text{CCH}_3$ ), 1.23 (s, 6H,  $\text{BCH}_3$ ) ppm.  $^{13}\text{C}\{^1\text{H}\}$  NMR (125.8 MHz,  $d_8$ -THF):  $\delta = 134.9$  (Ar-CH), 133.7 (Ar-CB), 124.6 (Ar-CMe), 20.6 ( $\text{CCH}_3$ ),  $-0.9$  ( $\text{BCH}_3$ ) ppm.  $^{11}\text{B}$  NMR (160.5 MHz,  $d_8$ -THF):  $\delta = 22.0$  (s, br) ppm.  $^7\text{Li}\{^1\text{H}\}$  NMR (194.4 MHz,  $d_8$ -THF):  $\delta = -8.99$  (s, br) ppm. UV-vis (THF):  $\lambda_{\text{max}} = 287$ ,  $\lambda_2 = 333$ ,  $\lambda_3 = 423$ ,  $\lambda_4 = 481$  (broad shoulder) nm. *Note: due to the instability of the isolated complex no further analytical data was collected.*

### Complex 2-Cr

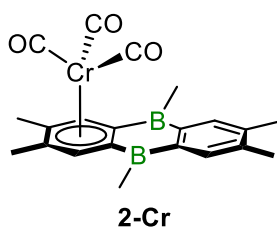

To a solution of **2** (40.0 mg, 154  $\mu\text{mol}$ , 1.00 equiv.) in THF (4 mL) was added  $[(\text{MeCN})_3\text{Cr}(\text{CO})_3]$  (39.9 mg, 154  $\mu\text{mol}$ , 1.00 equiv.) while stirring, upon which the mixture instantly turned red. After stirring for 16 h at rt all volatiles were removed *in vacuo*. The residue was extracted with toluene (8 mL, then 3 x 3 mL) and the combined extracts dried. The crude product was recrystallized from hexane (7 mL) at  $4\text{ }^\circ\text{C}$  and dried *in vacuo*, yielding **2-Cr** as a red solid (44.0 mg, 111  $\mu\text{mol}$ , 72%). Single crystals suitable for X-ray diffraction were obtained by slow evaporation of a saturated solution of **2-Cr** in DME at rt.  $^1\text{H}$  NMR (500.1 MHz,  $d_8$ -THF):  $\delta = 7.69$  (s, 2H, Ar-CH), 5.83 (s, 2H,  $\text{Cr}\cdots\text{Ar-CH}$ ), 2.31 (s, 6H,  $\text{CCH}_3$ ), 2.28 (s, 6H,  $\text{CCH}_3$ ), 0.91 (s, 6H,  $\text{BCH}_3$ ) ppm.  $^{13}\text{C}\{^1\text{H}\}$  NMR (125.8 MHz,  $d_8$ -THF):  $\delta = 234.5$  (CO), 144.9 (Ar-CB), 138.9 (Ar-CMe), 136.6 (Ar-CH), 109.9 ( $\text{Cr}\cdots\text{Ar-CMe}$ ), 107.3 ( $\text{Cr}\cdots\text{Ar-CB}$ ), 103.0 ( $\text{Cr}\cdots\text{Ar-CH}$ ), 19.9 ( $\text{CCH}_3$ ), 18.9 ( $\text{Cr}\cdots\text{CCH}_3$ ), 3.8 ( $\text{BCH}_3$ ) ppm.  $^{11}\text{B}\{^1\text{H}\}$  NMR (128.5 MHz,  $d_8$ -THF):  $\delta = 46.3$  (s, br) ppm.  $^{11}\text{B}$  NMR (128.5 MHz,  $\text{C}_6\text{D}_6$ ):  $\delta = 64.9$  (s, br) ppm. FT-IR (solid):  $\tilde{\nu}(\text{CO}) = 1955, 1895, 1859\text{ cm}^{-1}$ . UV-vis (THF):  $\lambda_{\text{max}} = 349$  (broad),  $\lambda_2 = 287$  (shoulder),  $\lambda_3 = 431$  (broad),  $\lambda_4 = 497$  (very broad) nm. HRMS ASAP ( $m/z$ ) for  $[\text{C}_{21}\text{H}_{23}\text{B}_2\text{CrO}_3]^+ = [\text{M} + \text{H}]^+$ : calc. 397.1233; found 397.1231.

### Complex 2-Cr<sub>2</sub>

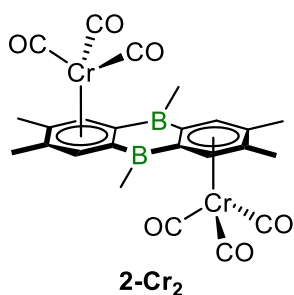

**Route A)** To a mixture of **2** (30.0 mg, 115  $\mu\text{mol}$ , 1.00 equiv.) and  $[(\text{MeCN})_3\text{Cr}(\text{CO})_3]$  (62.6 mg, 242  $\mu\text{mol}$ , 2.10 equiv.) in a thick-walled flask equipped with a Young valve was added hexane (4 mL), and the reaction mixture was stirred for 16 h at 100  $^\circ\text{C}$ . After cooling to rt all volatiles were removed *in vacuo*. The residue was extracted with toluene (10 mL, then 3 x 5 mL) and the combined extracts dried.

The crude product was recrystallized from hexane (6 mL) at 4  $^\circ\text{C}$  and dried *in vacuo*, yielding **2-Cr<sub>2</sub>** as a red solid (43.4 mg, 81.7  $\mu\text{mol}$ , 71%). Single crystals suitable for X-ray diffraction were obtained by diffusion of hexane into a saturated solution of **2-Cr<sub>2</sub>** in THF at  $-30$   $^\circ\text{C}$ .

**Route B)** To a mixture of **2-Cr** (25.0 mg, 63.1  $\mu\text{mol}$ , 1.00 equiv.) and  $[(\text{MeCN})_3\text{Cr}(\text{CO})_3]$  (18.0 mg, 69.4  $\mu\text{mol}$ , 1.10 equiv.) was added THF (4 mL), and the reaction mixture was stirred for 16 h at rt. After cooling to rt all volatiles were removed *in vacuo*. The residue was extracted with toluene (8 mL, then 3 x 4 mL) and the combined extracts dried. The crude product was recrystallized from hexane (6 mL) at 4  $^\circ\text{C}$  and dried *in vacuo*, yielding **2-Cr<sub>2</sub>** as a red solid (26.5 mg, 49.8  $\mu\text{mol}$ , 79%).  $^1\text{H}$  NMR (500.1 MHz,  $d_8$ -THF):  $\delta$  = 5.86 (s, 4H, Ar-CH), 2.31 (s, 12H, CCH<sub>3</sub>), 0.86 (s, 6H, BCH<sub>3</sub>) ppm.  $^{13}\text{C}\{^1\text{H}\}$  NMR (125.8 MHz,  $d_8$ -THF):  $\delta$  = 234.6 (CO), 111.4 (Ar-CMe), 104.9 (Ar-CB), 103.7 (Ar-CH), 18.8 (CCH<sub>3</sub>), 3.9 (BCH<sub>3</sub>) ppm.  $^{11}\text{B}$  NMR (160.5 MHz,  $d_8$ -THF):  $\delta$  = 49.1 (s, br) ppm. FT-IR (solid):  $\tilde{\nu}(\text{CO})$  = 1938, 1859  $\text{cm}^{-1}$ . UV-vis (THF):  $\lambda_{\text{max}}$  = 349 (broad),  $\lambda_2$  = 287 (shoulder),  $\lambda_3$  = 431 (broad),  $\lambda_4$  = 497 (very broad) nm. HRMS ASAP ( $m/z$ ) for  $[\text{C}_{24}\text{H}_{23}\text{B}_2\text{Cr}_2\text{O}_6]^+ = [\text{M} + \text{H}]^+$ : calc. 533.0485; found 533.0484.

### Complex 2-Mo<sub>2</sub>

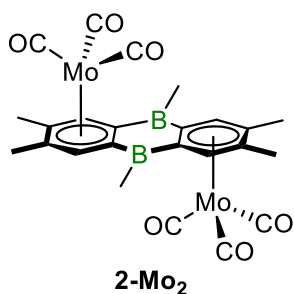

To a mixture of **2** (30.0 mg, 115  $\mu\text{mol}$ , 1.00 equiv.) and  $[(\text{MeCN})_3\text{Mo}(\text{CO})_3]$  (73.4 mg, 242  $\mu\text{mol}$ , 2.10 equiv.) in a thick-walled flask equipped with a Young valve was added hexane (4 mL), and the reaction mixture was stirred for 5 d at 100  $^\circ\text{C}$ . After cooling to rt, all volatiles were removed *in vacuo*. The residue was extracted with toluene (20 mL, then 3 x 7 mL) and the combined extracts dried.

The crude product was washed with hexane (4 x 4 mL) and dried *in vacuo*, yielding **2-Mo<sub>2</sub>** as a red solid (31.4 mg, 50.6  $\mu\text{mol}$ , 44%). Single crystals suitable for X-ray diffraction were obtained by slow evaporation of a saturated solution of **2-Mo<sub>2</sub>** in THF at rt.  $^1\text{H}$  NMR (500.1 MHz,  $\text{CD}_2\text{Cl}_2$ ):  $\delta$  = 6.06 (s, 4H, Ar-CH), 2.36 (s, 12H, CCH<sub>3</sub>), 0.91 (s, 6H, BCH<sub>3</sub>) ppm.  $^{13}\text{C}\{^1\text{H}\}$  NMR (125.8 MHz,  $\text{CD}_2\text{Cl}_2$ ):  $\delta$  = 221.8 (CO), 113.9 (Ar-CMe), 104.7 (Ar-CH),

101.0 (Ar-CB), 19.6 (CCH<sub>3</sub>), 1.5 (BCH<sub>3</sub>) ppm. <sup>11</sup>B NMR (160.5 MHz, CD<sub>2</sub>Cl<sub>2</sub>): δ = 59.1 (s, br) ppm. <sup>11</sup>B NMR (128.5 MHz, d<sub>8</sub>-THF): δ = 45.0 (s, br) ppm. FT-IR (solid):  $\tilde{\nu}(\text{CO}) = 1944, 1874 \text{ cm}^{-1}$ . UV-vis (THF):  $\lambda_{\text{max}} = 336, \lambda_2 = 287$  (shoulder),  $\lambda_3 = 417, \lambda_4 = 464$  (broad shoulder) nm. HRMS ASAP (*m/z*) for [C<sub>24</sub>H<sub>23</sub>B<sub>2</sub>Mo<sub>2</sub>O<sub>6</sub>]<sup>+</sup> = [M + H]<sup>+</sup>: calc. 620.9797; found 620.9780.

### Complex 2-W<sub>2</sub>

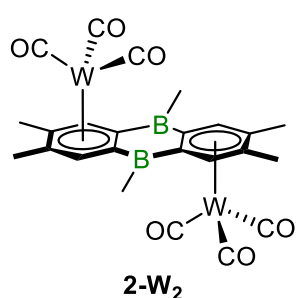

To a mixture of **2** (20.0 mg, 76.9 μmol, 1.00 equiv.) and [(MeCN)<sub>3</sub>W(CO)<sub>3</sub>] (63.0 mg, 161 μmol, 2.10 equiv.) in a thick-walled flask equipped with a Young valve was added hexane (5 mL), and the reaction mixture was stirred for 5 d at 100 °C. After cooling to rt, all volatiles were removed *in vacuo*. The residue was extracted with THF (15 mL, then 3 x 5 mL) and the combined extracts dried.

The crude product was recrystallized from hexane (7 mL) at 4 °C and dried *in vacuo*, yielding **2-W<sub>2</sub>** as a red solid (39.0 mg, 49.0 μmol, 64%). Single crystals suitable for X-ray diffraction were obtained by slow evaporation of a saturated solution of **2-W<sub>2</sub>** in THF at rt. <sup>1</sup>H NMR (500.1 MHz, d<sub>8</sub>-THF): δ = 5.99 (s, 4H, Ar-CH), 2.45 (s, 12H, CCH<sub>3</sub>), 0.74 (s, 6H, BCH<sub>3</sub>) ppm. <sup>13</sup>C {<sup>1</sup>H} NMR (125.8 MHz, d<sub>8</sub>-THF): δ = 212.4 (CO), 110.5 (Ar-CMe), 103.8 (Ar-CB), 101.3 (Ar-CH), 18.7 (CCH<sub>3</sub>), 3.2 (BCH<sub>3</sub>) ppm. <sup>11</sup>B {<sup>1</sup>H} NMR (160.5 MHz, d<sub>8</sub>-THF): δ = 44.4 (s, br) ppm. FT-IR (solid):  $\tilde{\nu}(\text{CO}) = 1936, 1859 \text{ cm}^{-1}$ . UV-vis (THF):  $\lambda_{\text{max}} = 334, \lambda_2 = 280, \lambda_3 = 358$  (shoulder),  $\lambda_4 = 422$  (shoulder),  $\lambda_5 = 469$  (very broad) nm. HRMS ASAP (*m/z*) for [C<sub>24</sub>H<sub>23</sub>B<sub>2</sub>W<sub>2</sub>O<sub>6</sub>]<sup>+</sup> = [M + H]<sup>+</sup>: calc. 797.0686; found 797.0701.

### Complex 3-Cr<sub>2</sub>

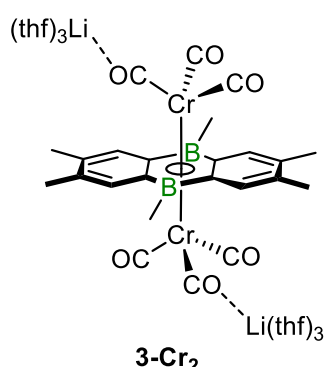

To a freshly prepared solution of **3** (31.5 mg, 115 μmol, 1.00 equiv.) in THF (3 mL) was added [(MeCN)<sub>3</sub>Cr(CO)<sub>3</sub>] (59.6 mg, 230 μmol, 2.00 equiv.) while stirring, upon which a dark suspension immediately formed. After filtration through celite and extraction of the solid residue with THF (3 x 2 mL), the combined filtrates were dried *in vacuo*. The crude product was washed with Et<sub>2</sub>O (4 x 2 mL), benzene (6 x 2 mL), hexane (3 x 2 mL), and again with Et<sub>2</sub>O (4 x 2 mL). Drying *in vacuo* yielded **3-Cr<sub>2</sub>** as an orange solid (13.0 mg, 15.6 μmol, 14%). Single crystals suitable for X-ray diffraction were obtained by slow evaporation of a saturated solution of **3-Cr<sub>2</sub>** in THF at rt. <sup>1</sup>H NMR (500.1 MHz, d<sub>8</sub>-THF): δ = 7.44 (s, 4H, Ar-CH), 3.63-3.60 (m, 16H, thf-CH<sub>2</sub>), 2.06 (s, 12H, CCH<sub>3</sub>), 1.79-1.76 (m, 16H, thf-CH<sub>2</sub>), 1.62 (s, 6H, BCH<sub>3</sub>)

ppm.  $^{13}\text{C}\{^1\text{H}, ^{11}\text{B}\}$  NMR (150.9 MHz,  $d_8$ -THF):  $\delta = 242.0$  (CO), 136.1 (Ar-CH), 128.7 (Ar-CMe), 101.2 (Ar-CB), 68.0 (thf- $\text{CH}_2$ ), 26.2 (thf- $\text{CH}_2$ ), 20.1 (CCH<sub>3</sub>), 0.0 (BCH<sub>3</sub>) ppm.  $^{11}\text{B}\{^1\text{H}\}$  NMR (160.5 MHz,  $d_8$ -THF):  $\delta = 11.9$  (s, br) ppm.  $^7\text{Li}\{^1\text{H}\}$  NMR (233.3 MHz,  $d_8$ -THF):  $\delta = -0.98$  (s) ppm. FT-IR (solid):  $\tilde{\nu}(\text{CO}) = 1935, 1881, 1792, 1773, 1713 \text{ cm}^{-1}$ . UV-vis (THF):  $\lambda_{\text{max}} = 308, \lambda_2 = 290$  (shoulder),  $\lambda_3 = 349$  (shoulder),  $\lambda_4 = 418$  (very broad) nm. HRMS ASAP ( $m/z$ ) for  $[\text{C}_{24}\text{H}_{22}\text{B}_2\text{Cr}_2\text{O}_6]^- = [\text{M}]^-$ : calc. 532.0418; found 532.0422.

### Complex 3-Mo<sub>2</sub>

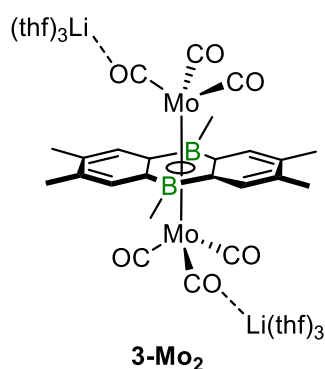

To a freshly prepared solution of **3** (31.5 mg, 115  $\mu\text{mol}$ , 1.00 equiv.) in THF (3 mL) was added  $[(\text{MeCN})_3\text{Mo}(\text{CO})_3]$  (69.7 mg, 230  $\mu\text{mol}$ , 2.00 equiv.) while stirring, upon which a dark suspension immediately formed. After filtration through celite and extraction of the solid residue with THF (3 x 2 mL), the combined filtrates were dried *in vacuo*. The crude product was washed with Et<sub>2</sub>O (4 x 2 mL), benzene (8 x 3 mL), pentane (3 x 2 mL), and cold THF (4 x 2 mL,  $-30^\circ\text{C}$ ). Drying *in vacuo* yielded **3-Mo<sub>2</sub>** as a yellow solid (36.1 mg, 33.9  $\mu\text{mol}$ , 29%). Single crystals suitable for X-ray diffraction were obtained by slow evaporation of a saturated solution of **3-Mo<sub>2</sub>** in THF at rt.  $^1\text{H}$  NMR (600.2 MHz,  $d_8$ -THF):  $\delta = 7.45$  (s, 4H, Ar-CH), 3.63-3.61 (m, 24H, thf- $\text{CH}_2$ ), 2.09 (s, 12H, CCH<sub>3</sub>), 1.79-1.76 (m, 24H, thf- $\text{CH}_2$ ), 1.51 (s, 6H, BCH<sub>3</sub>) ppm.  $^{13}\text{C}\{^1\text{H}, ^{11}\text{B}\}$  NMR (150.9 MHz,  $d_8$ -THF):  $\delta = 234.6$  (CO), 135.4 (Ar-CH), 128.0 (Ar-CMe), 105.0 (Ar-CB), 68.0 (thf- $\text{CH}_2$ ), 26.2 (thf- $\text{CH}_2$ ), 20.1 (CCH<sub>3</sub>),  $-0.2$  (BCH<sub>3</sub>) ppm.  $^{11}\text{B}\{^1\text{H}\}$  NMR (160.5 MHz,  $d_8$ -THF):  $\delta = 12.0$  (s, br) ppm.  $^7\text{Li}\{^1\text{H}\}$  NMR (194.4 MHz,  $d_8$ -THF):  $\delta = -0.86$  (s) ppm. FT-IR (solid):  $\tilde{\nu}(\text{CO}) = 1928, 1888, 1796, 1779, 1725, 1711 \text{ cm}^{-1}$ . UV-vis (THF):  $\lambda_{\text{max}} = 296, \lambda_2 = 344$  (broad tailing) nm. HRMS ASAP ( $m/z$ ) for  $[\text{C}_{24}\text{H}_{22}\text{B}_2\text{Mo}_2\text{O}_6]^- = [\text{M}]^-$ : calc. 619.9713; found 619.9746.

## NMR spectra of isolated compounds

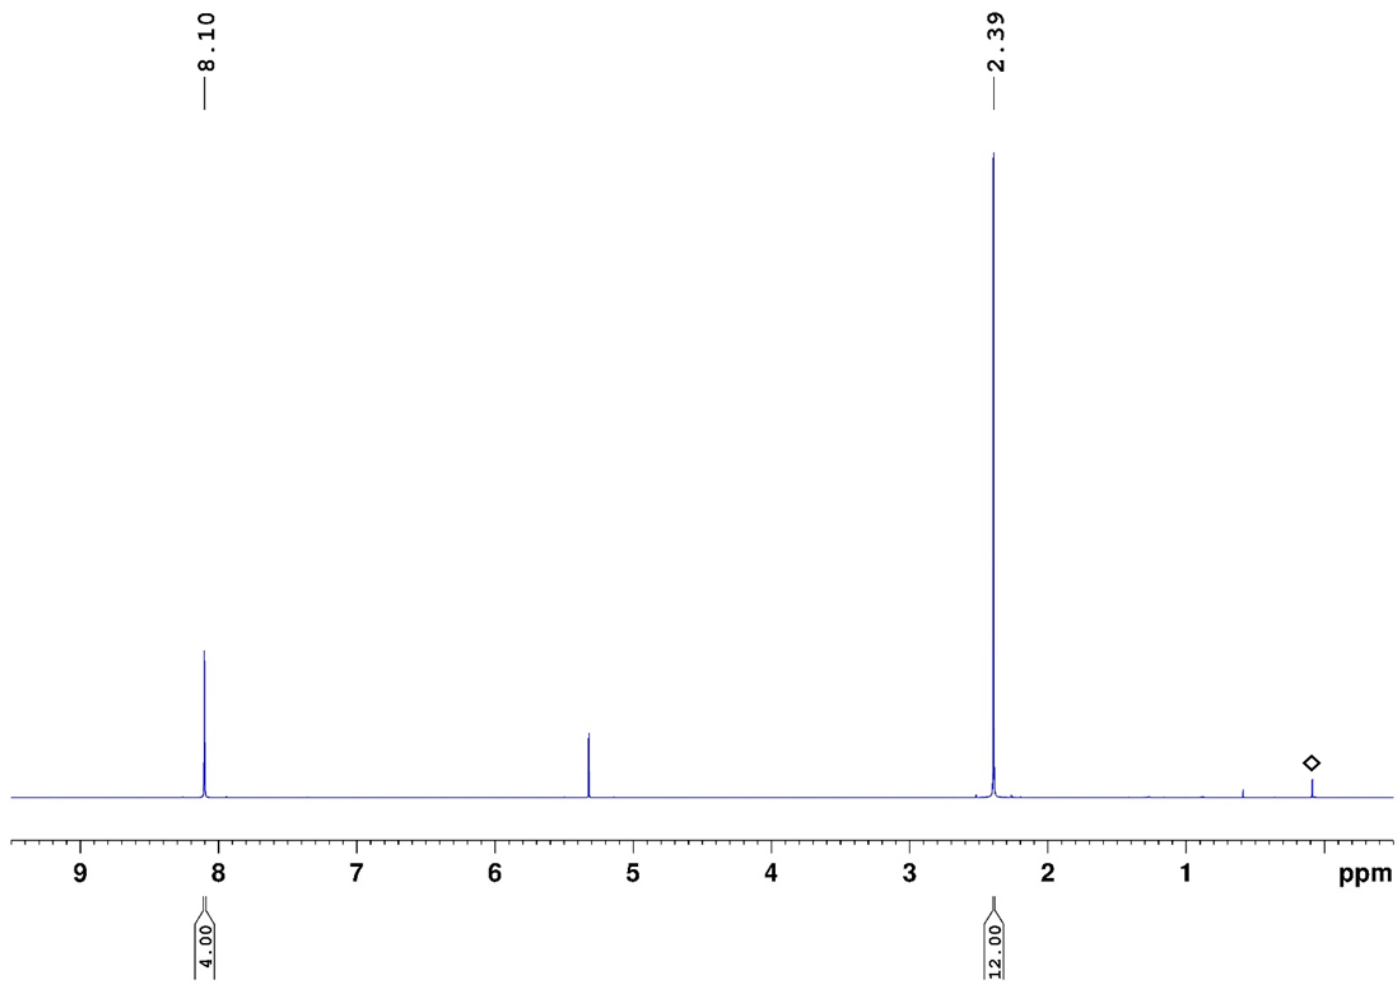

**Figure S1.**  $^1\text{H}$  NMR spectrum of **1** in  $\text{CD}_2\text{Cl}_2$ . The resonance marked  $\diamond$  belongs to silicon grease.

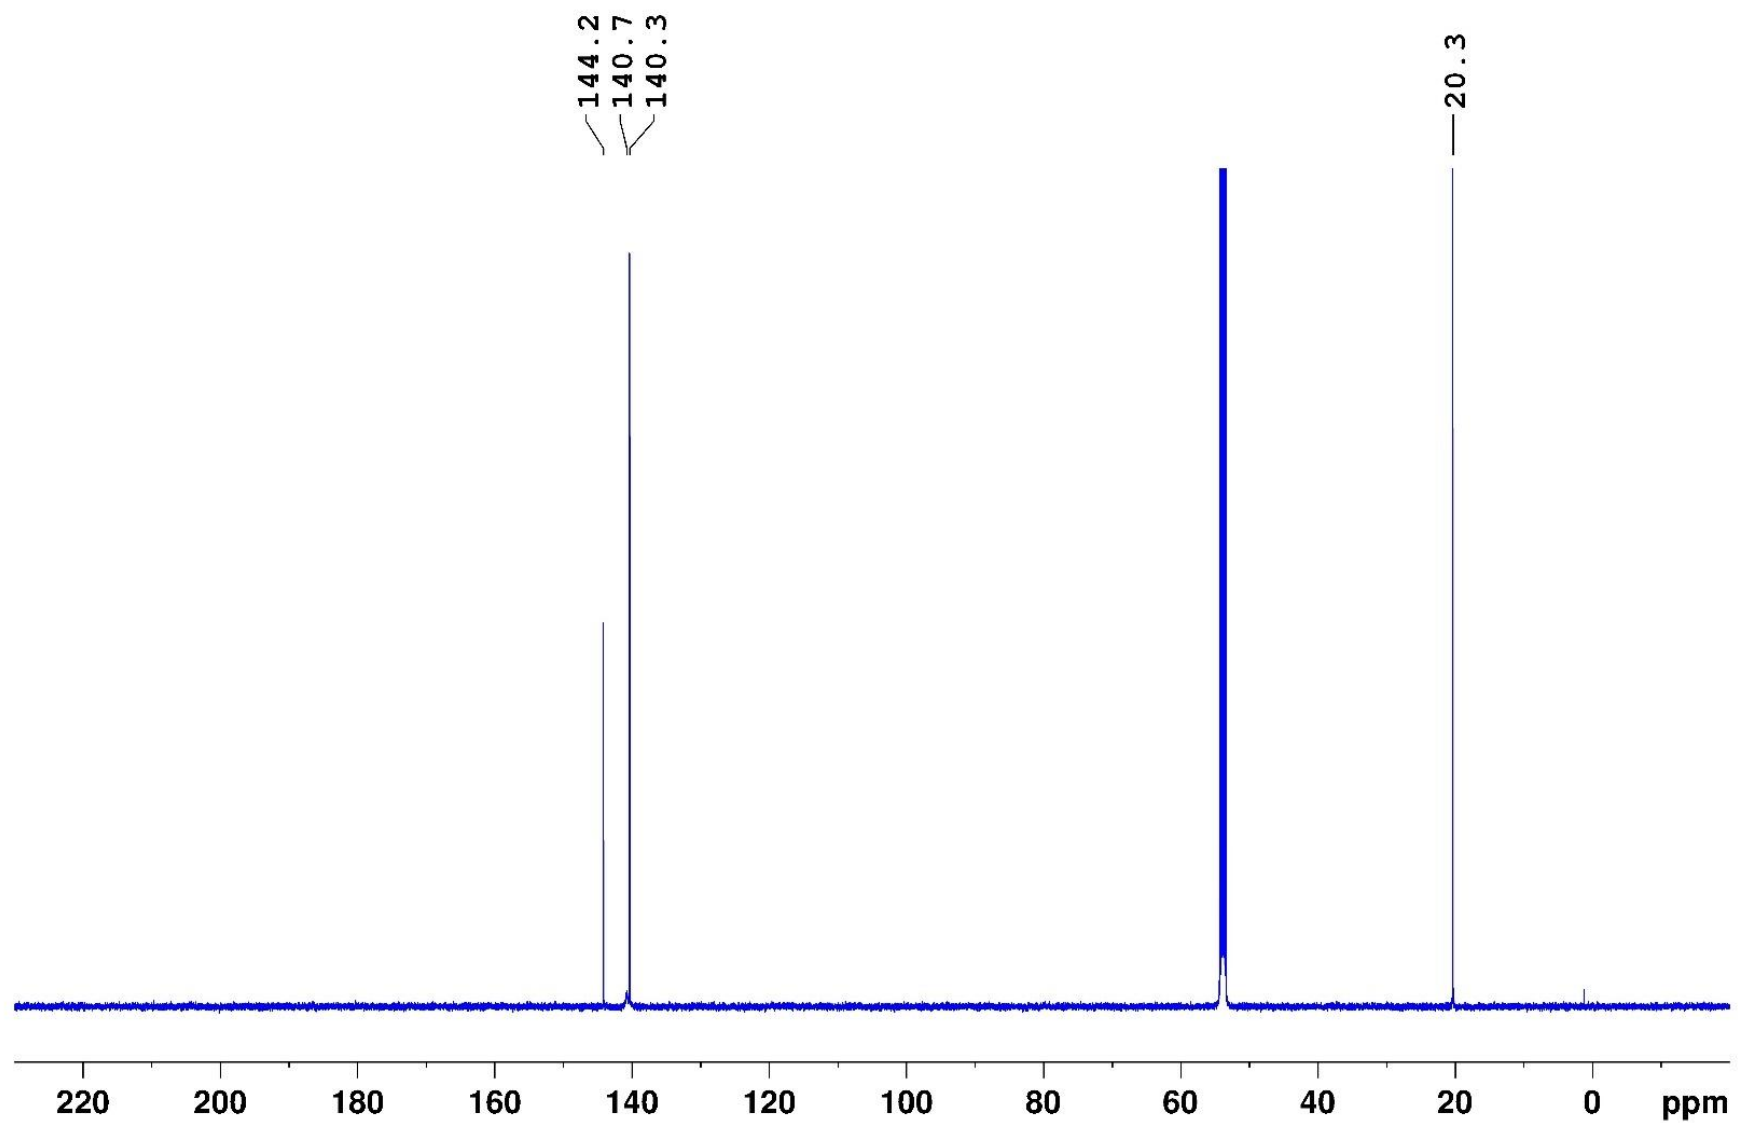

**Figure S2.**  $^{13}\text{C}\{^1\text{H}\}$  NMR spectrum of **1** in  $\text{CD}_2\text{Cl}_2$ .

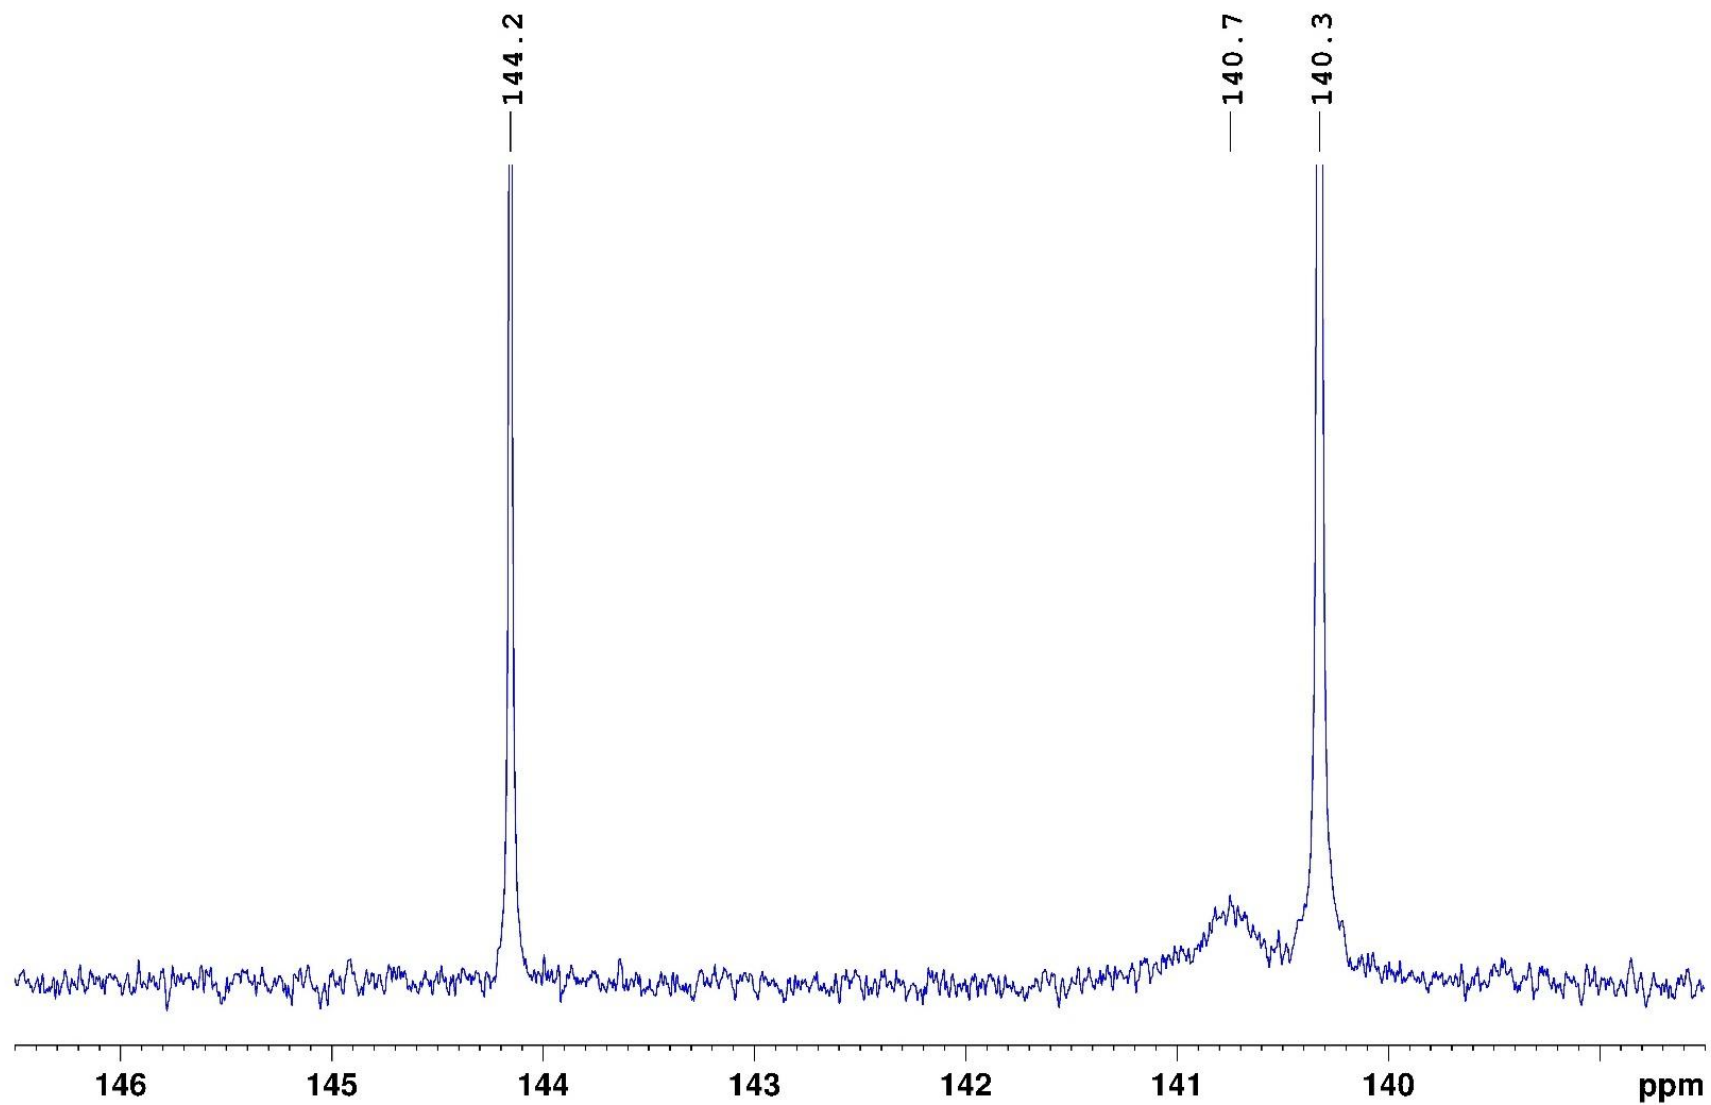

**Figure S3.** Aromatic region of the  $^{13}\text{C}\{^1\text{H}\}$  NMR spectrum of **1** in  $\text{CD}_2\text{Cl}_2$ .

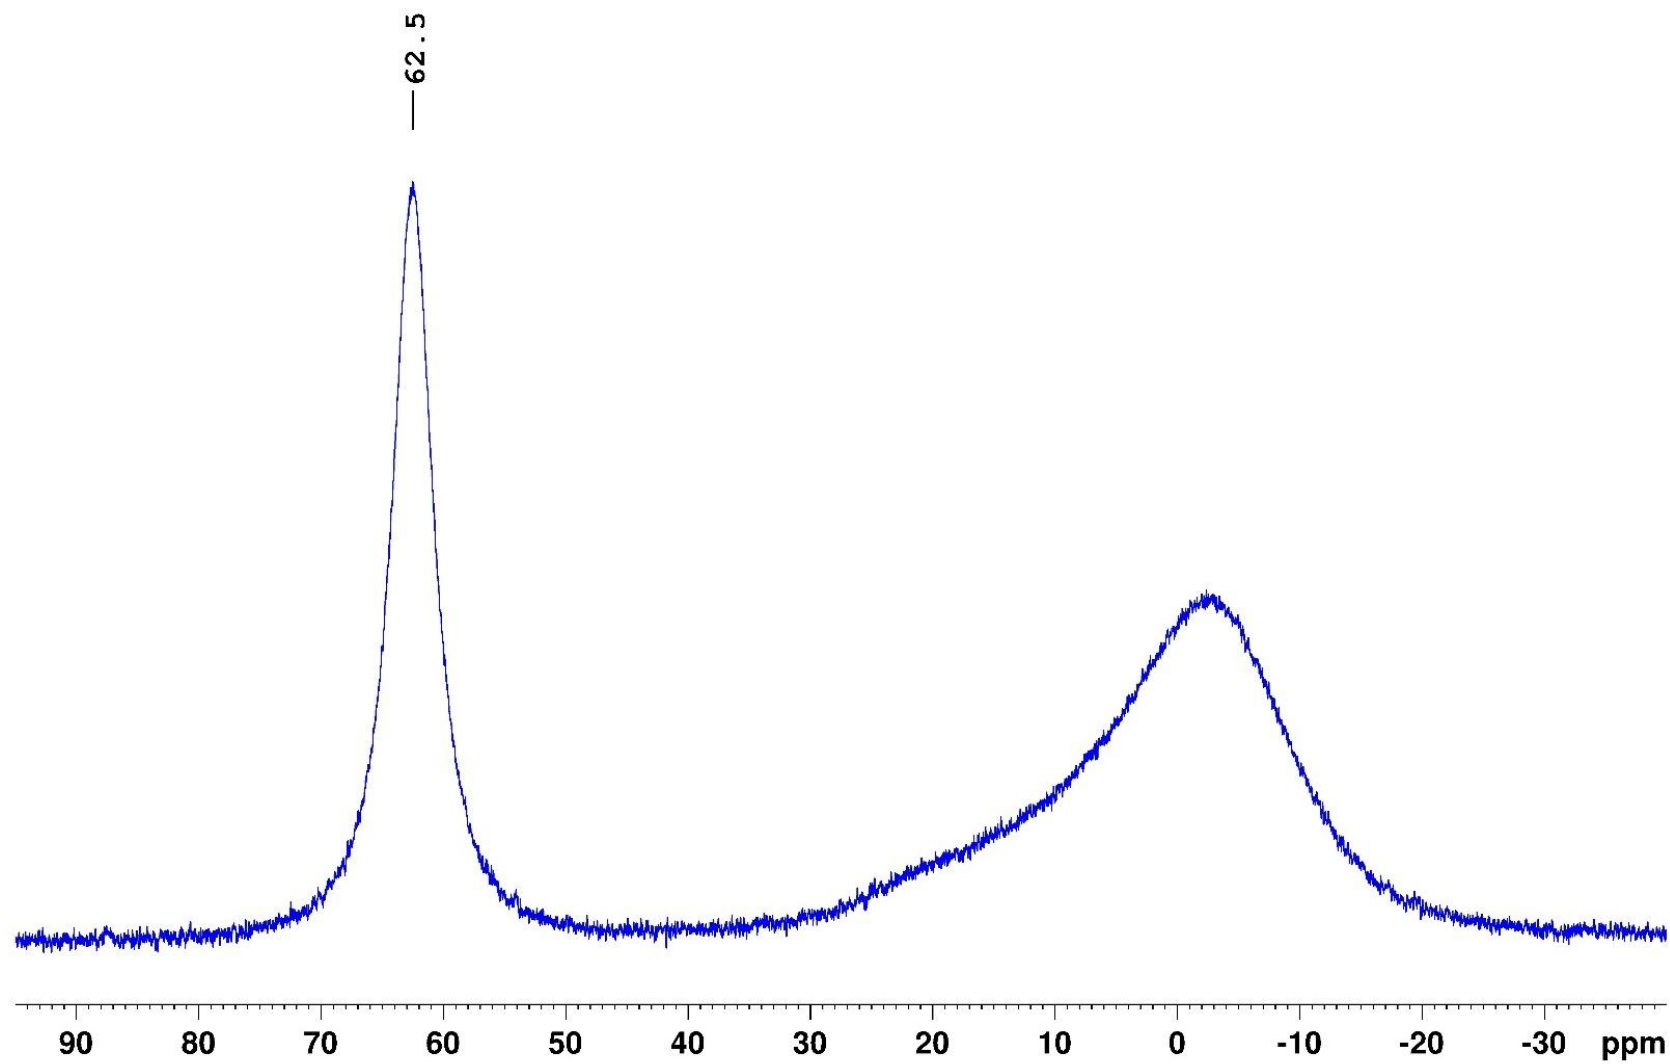

Figure S4.  $^{11}\text{B}$  NMR spectrum of **1** in  $\text{CD}_2\text{Cl}_2$ .

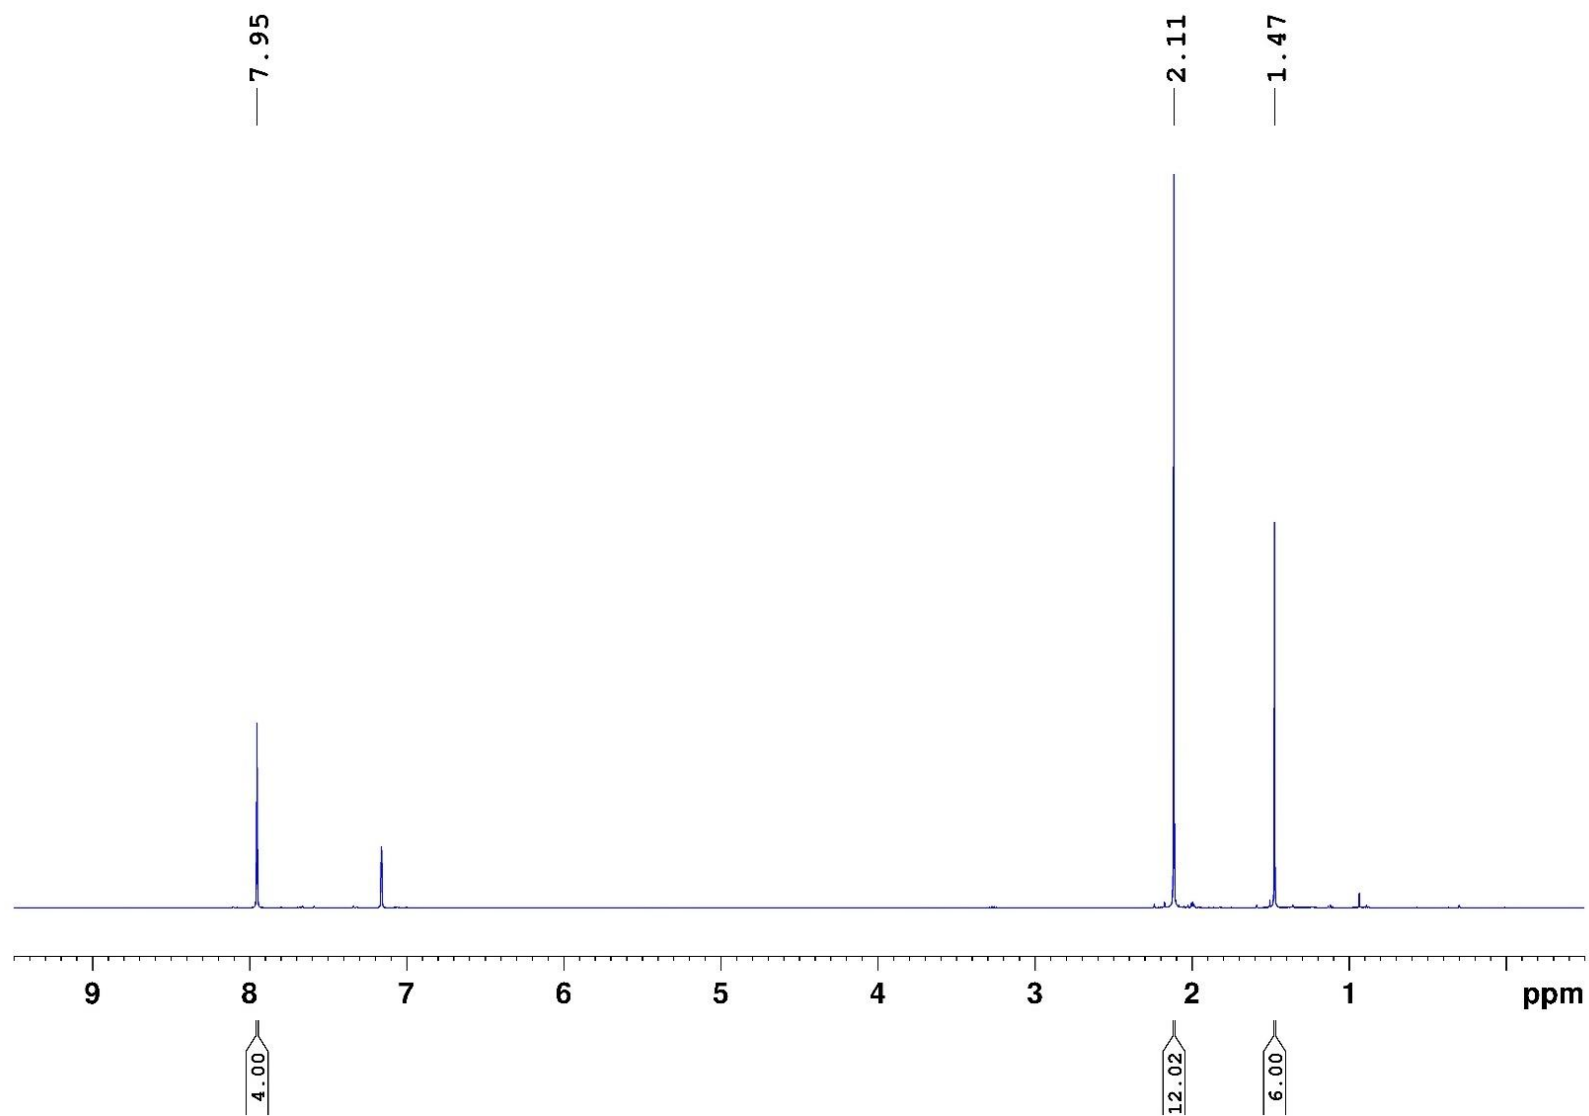

**Figure S5.**  $^1\text{H}$  NMR spectrum of **2** in  $\text{C}_6\text{D}_6$ .

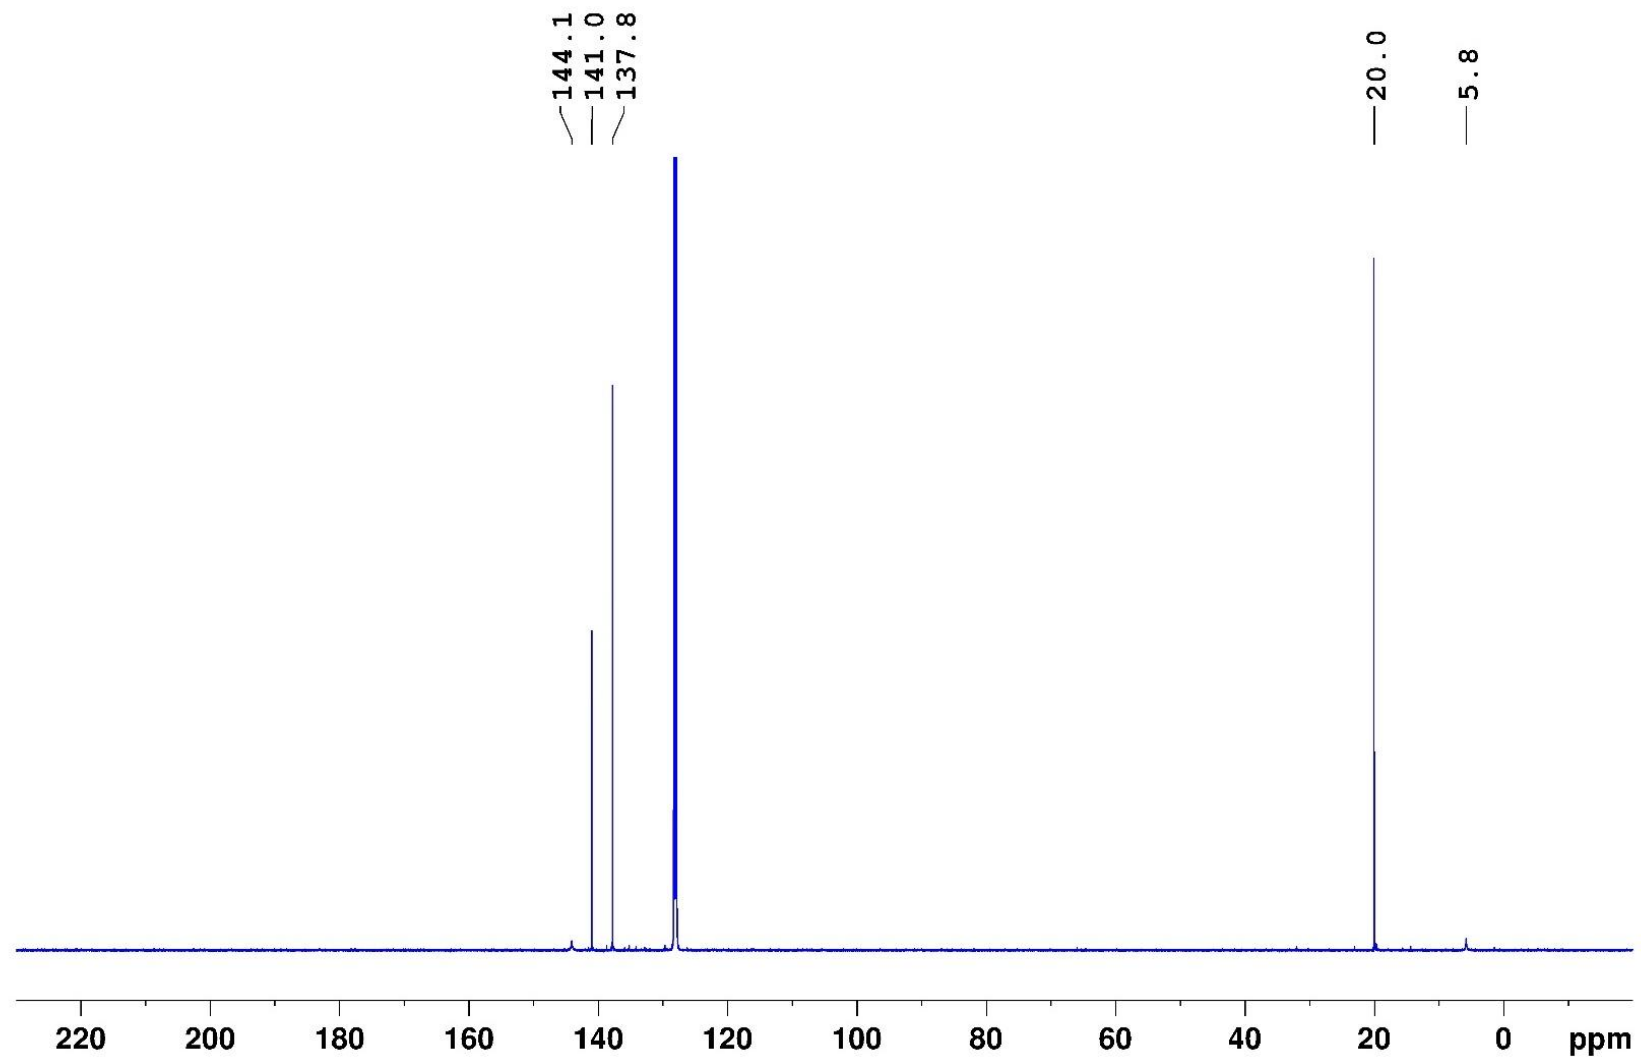

**Figure S6.**  $^{13}\text{C}\{^1\text{H}\}$  NMR spectrum of **2** in  $\text{C}_6\text{D}_6$ .

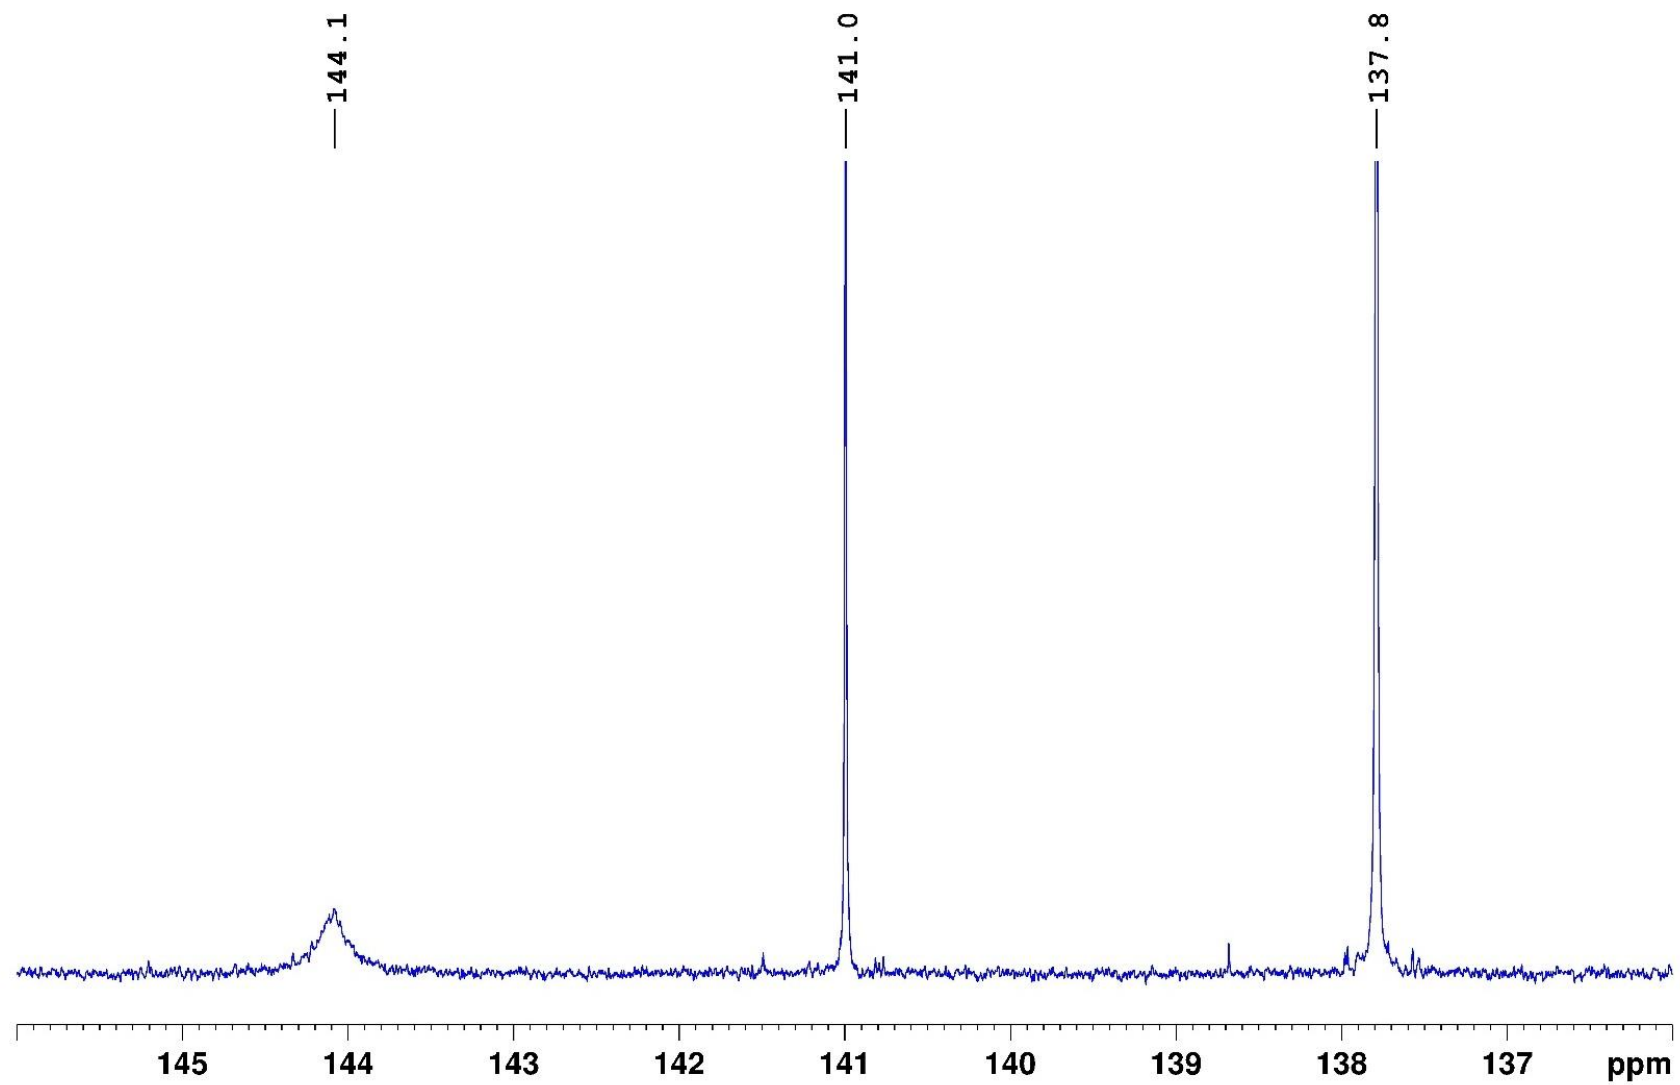

**Figure S7.** Aromatic region of the  $^{13}\text{C}\{^1\text{H}\}$  NMR spectrum of **2** in  $\text{C}_6\text{D}_6$ .

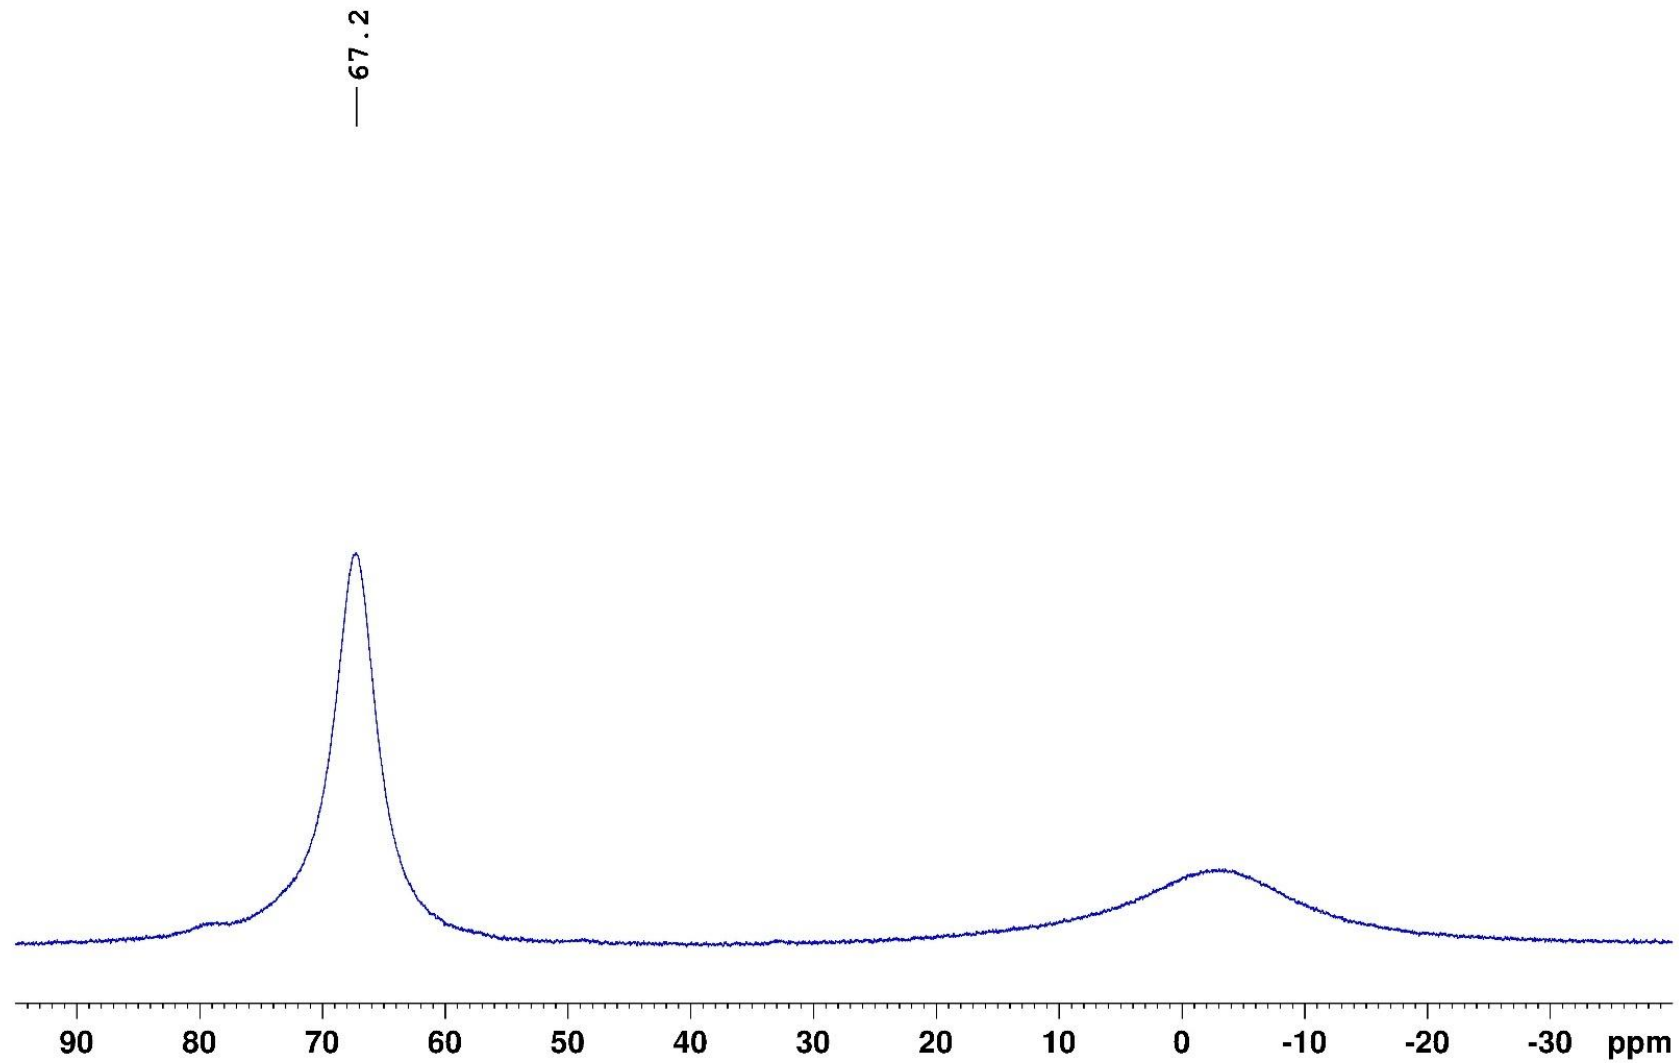

**Figure S8.**  $^{11}\text{B}\{^1\text{H}\}$  NMR spectrum of **2** in  $\text{C}_6\text{D}_6$ .

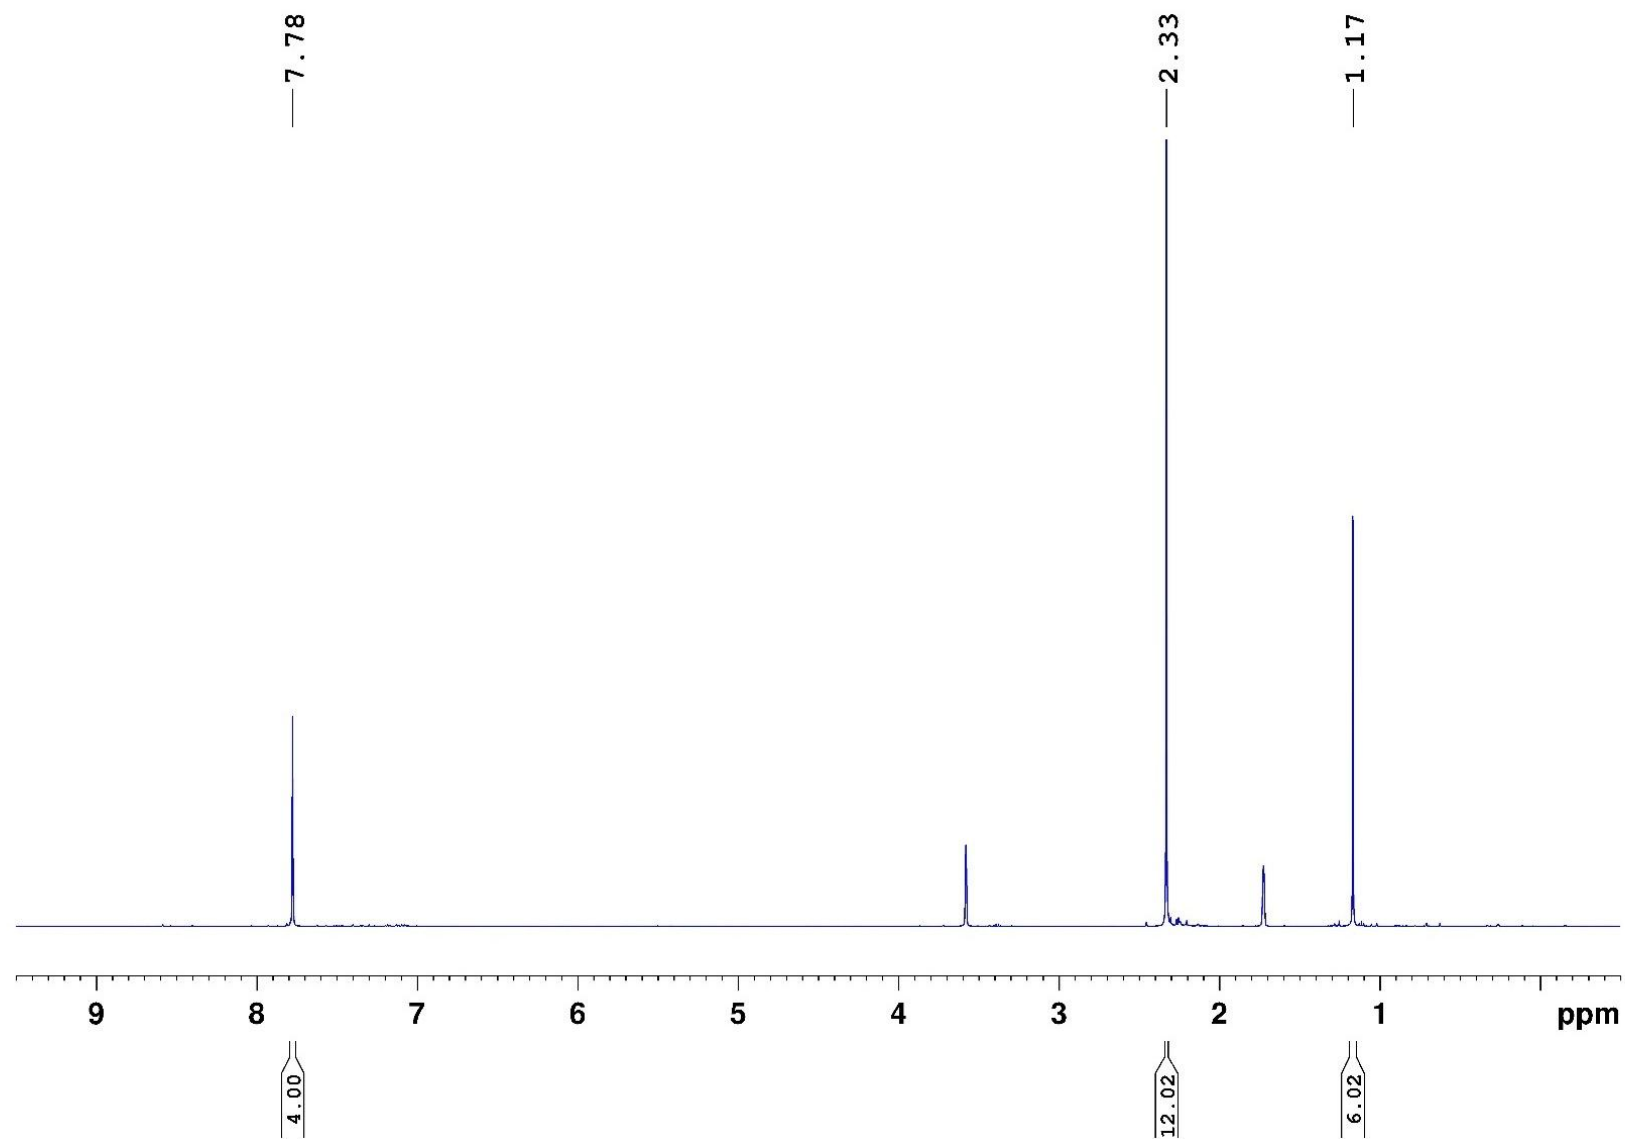

**Figure S9.**  $^1\text{H}$  NMR spectrum of **2** in  $d_8$ -THF.

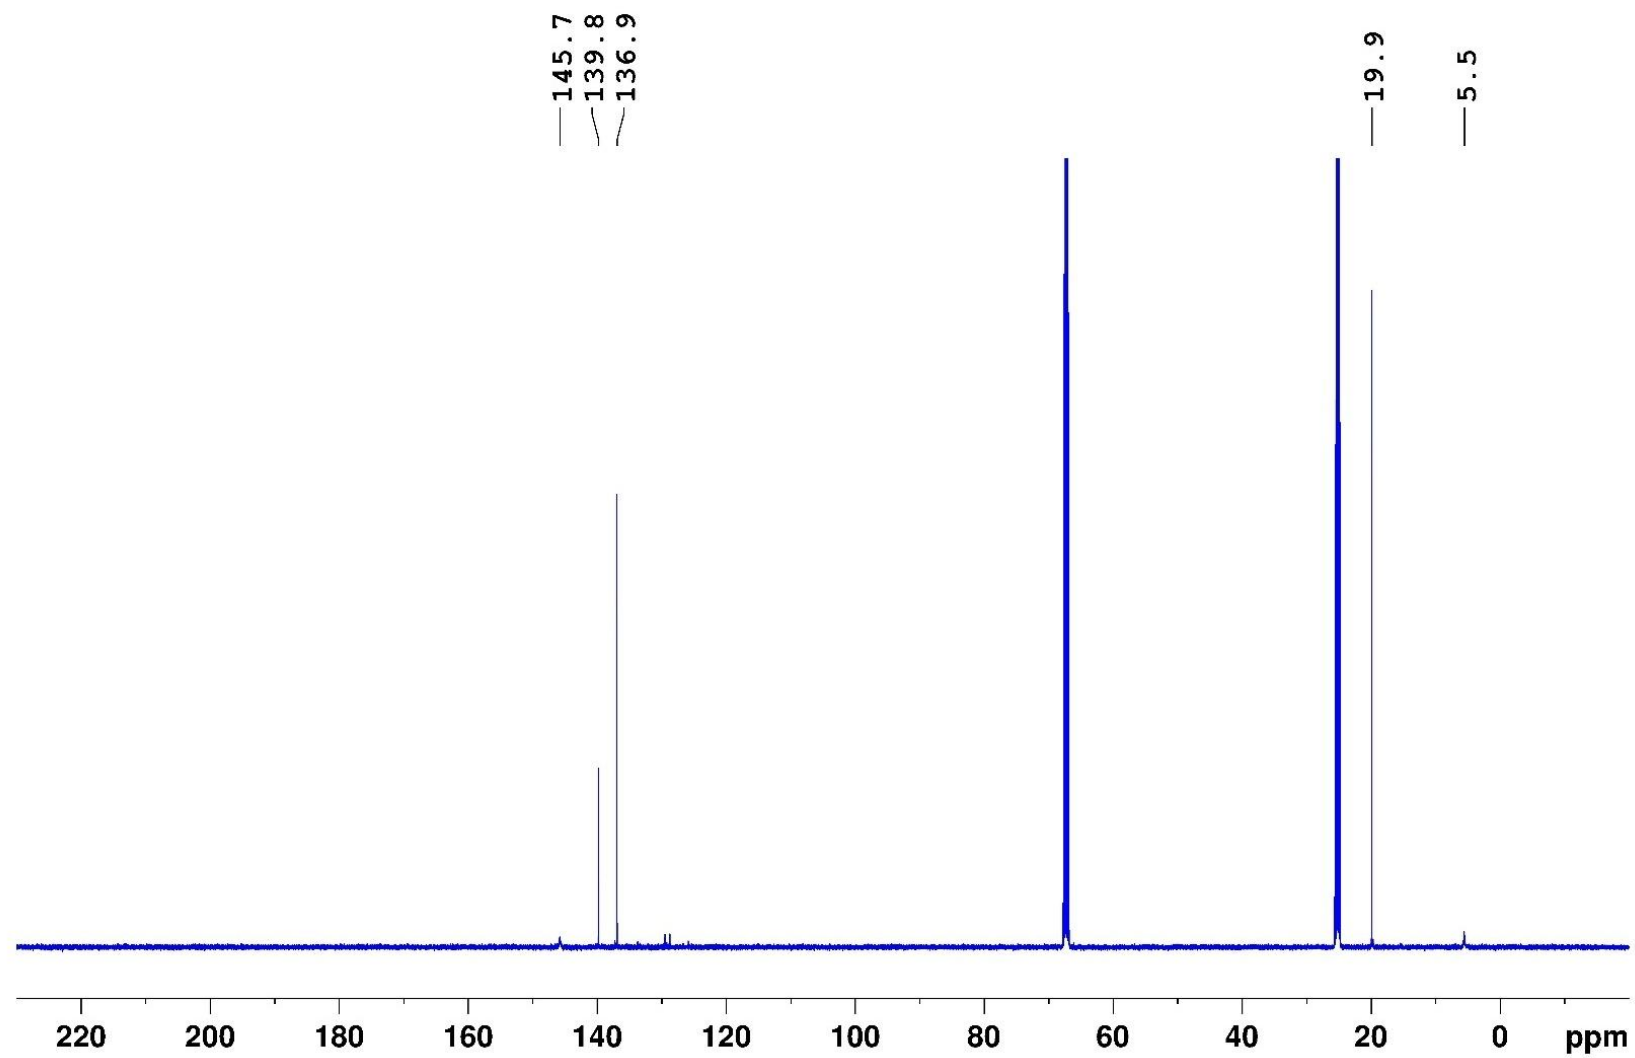

**Figure S10.**  $^{13}\text{C}\{^1\text{H}\}$  NMR spectrum of **2** in  $d_8$ -THF.

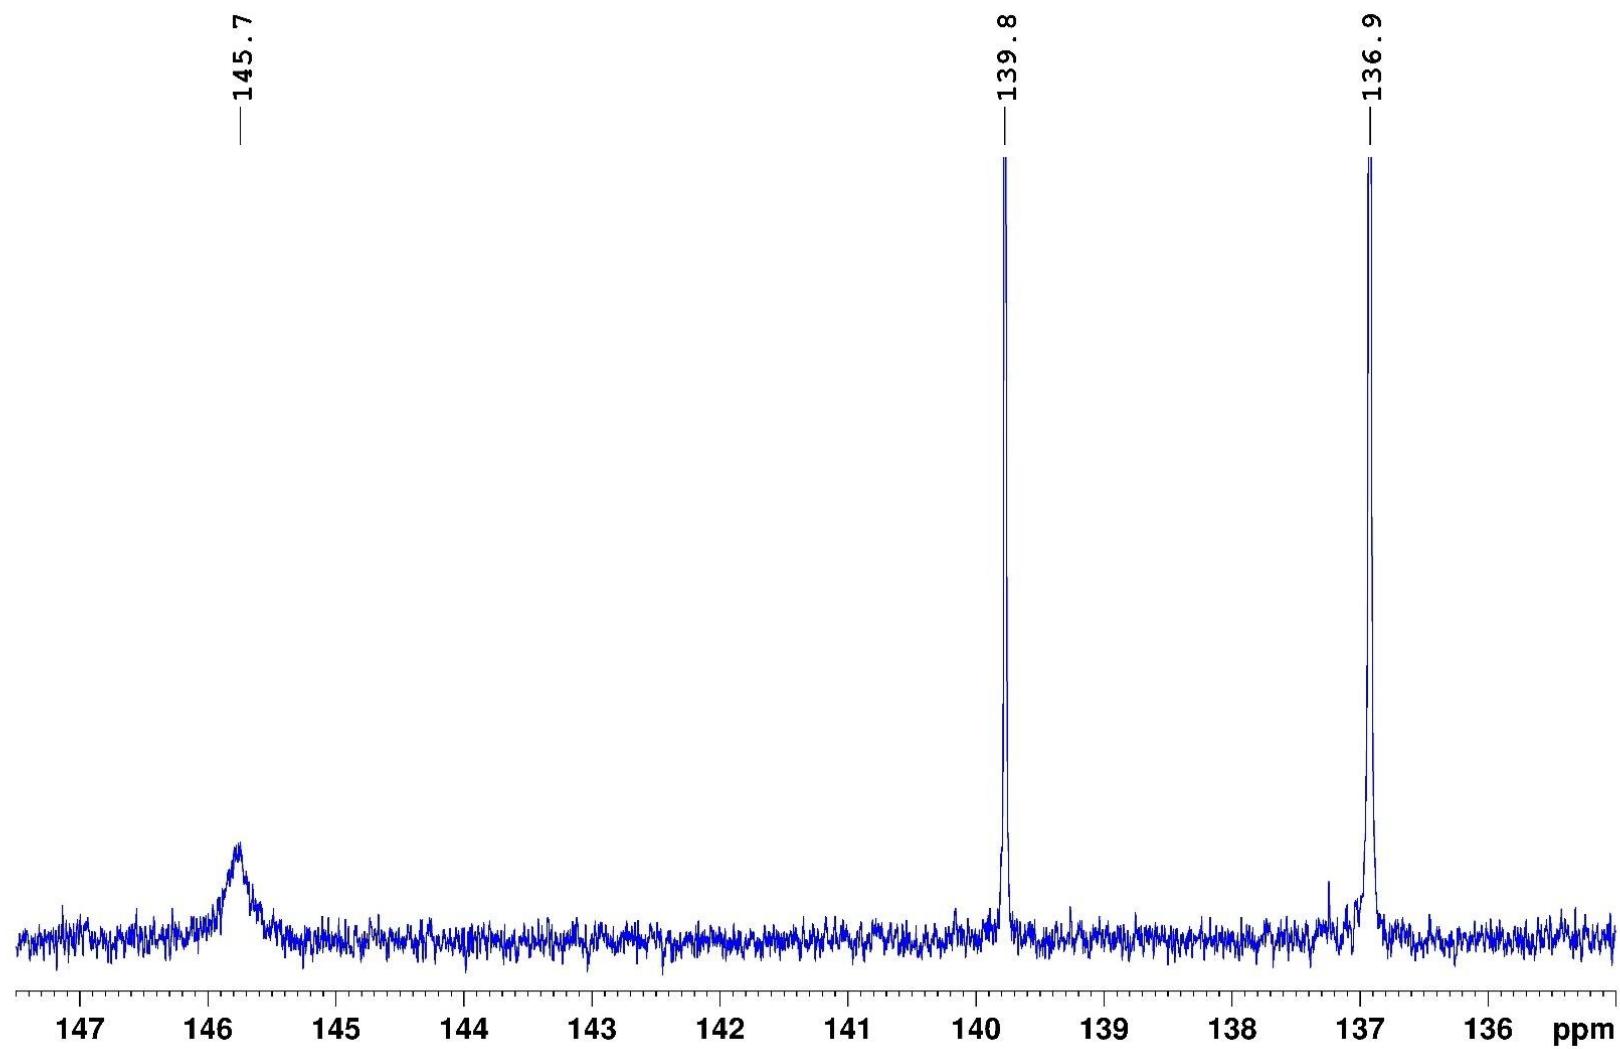

**Figure S11.** Aromatic region of the  $^{13}\text{C}\{^1\text{H}\}$  NMR spectrum of **2** in  $d_8$ -THF.

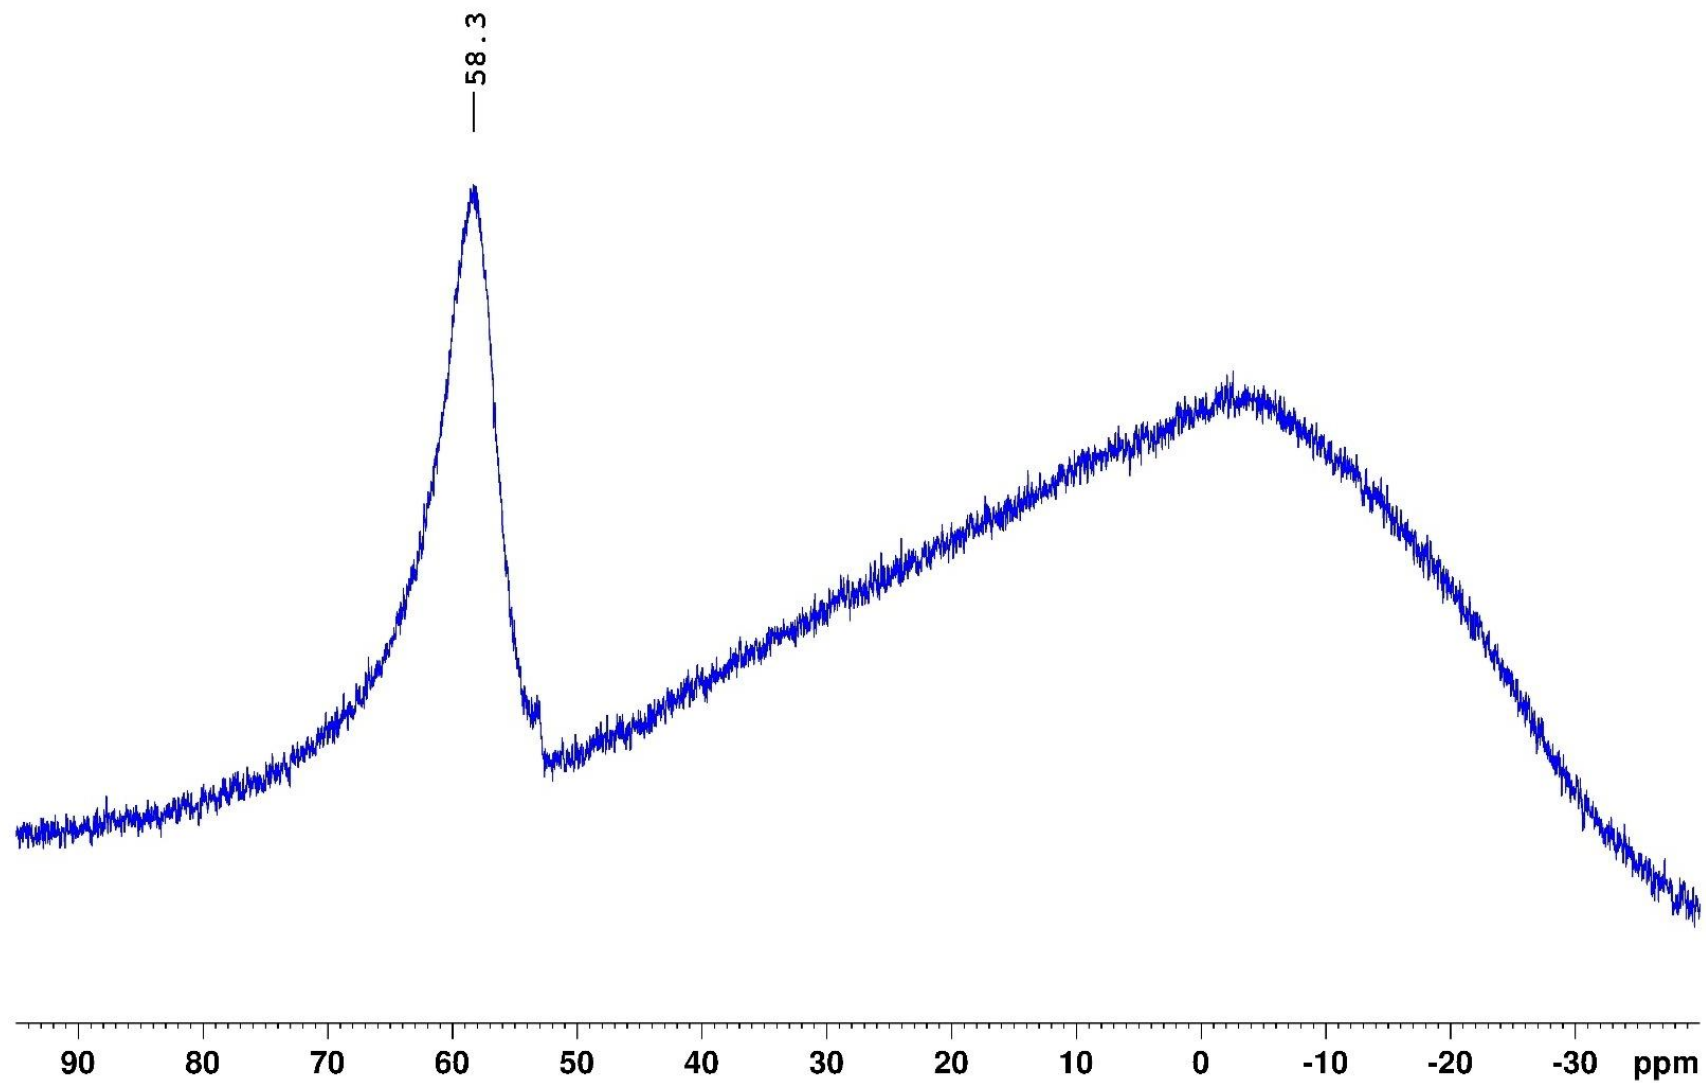

Figure S12.  $^{11}\text{B}\{^1\text{H}\}$  NMR spectrum of **2** in  $d_8$ -THF.

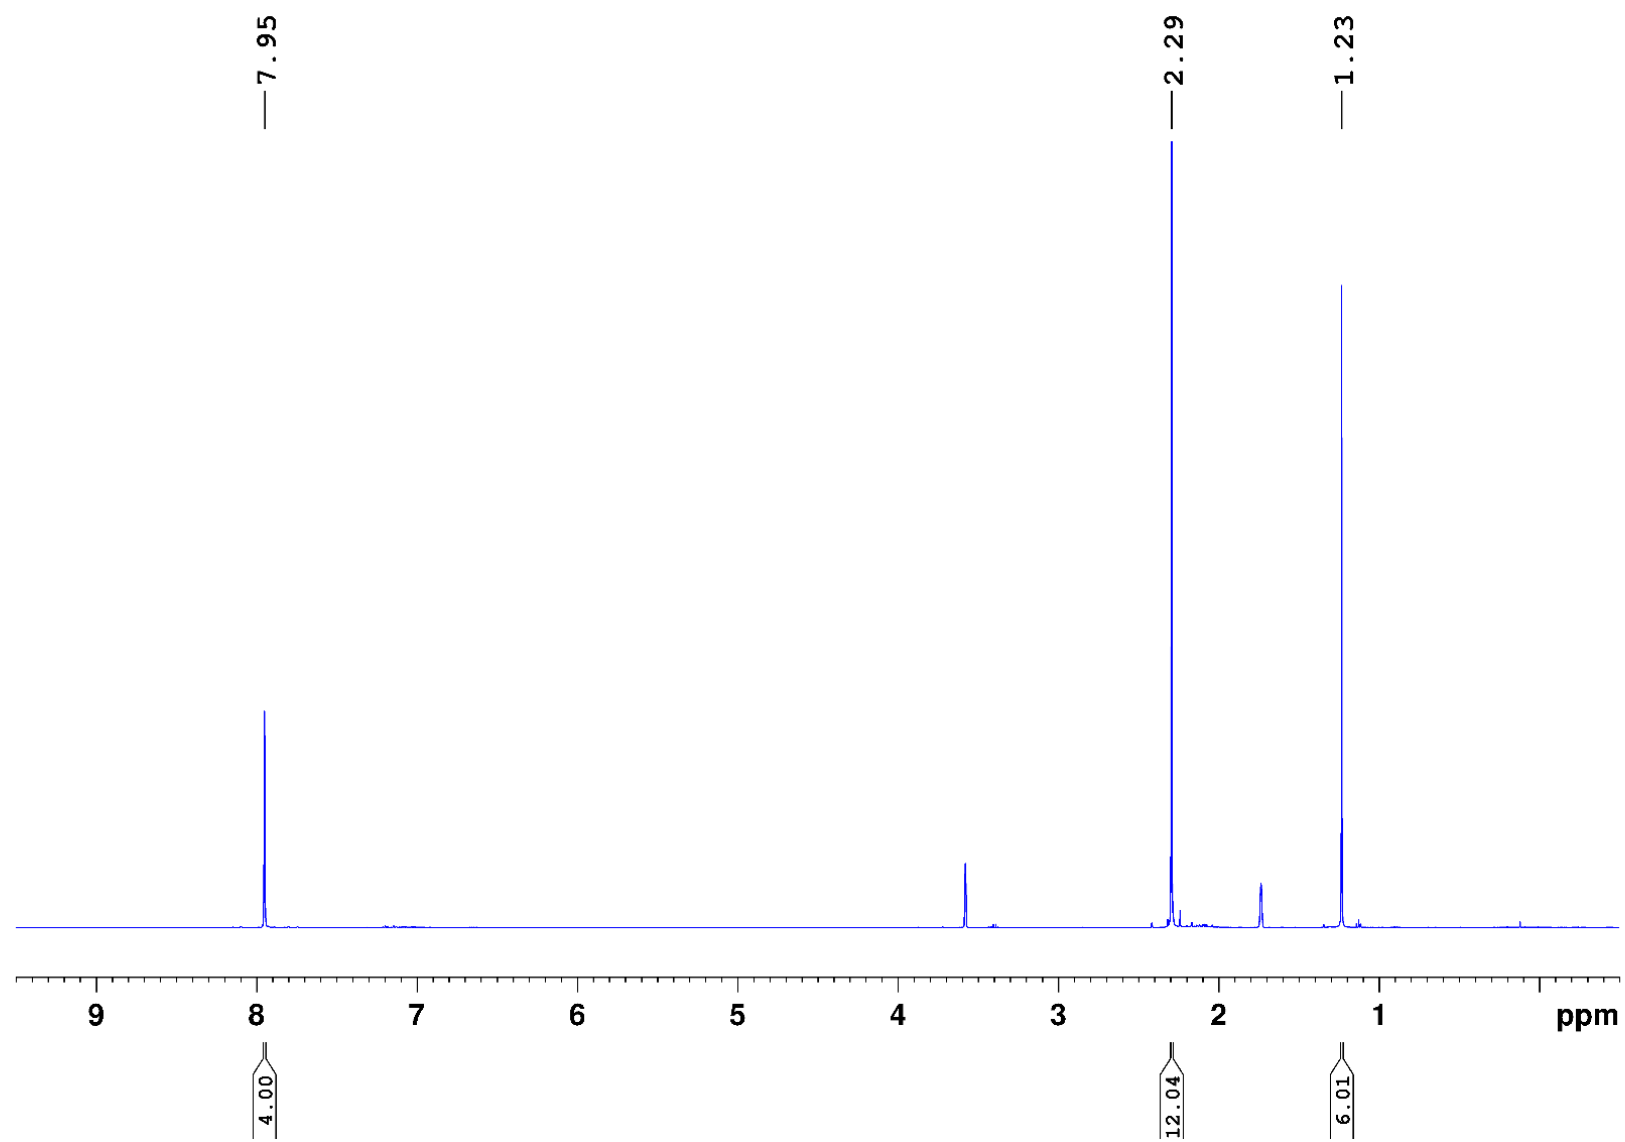

**Figure S13.**  $^1\text{H}$  NMR spectrum of **3** in  $d_8$ -THF.

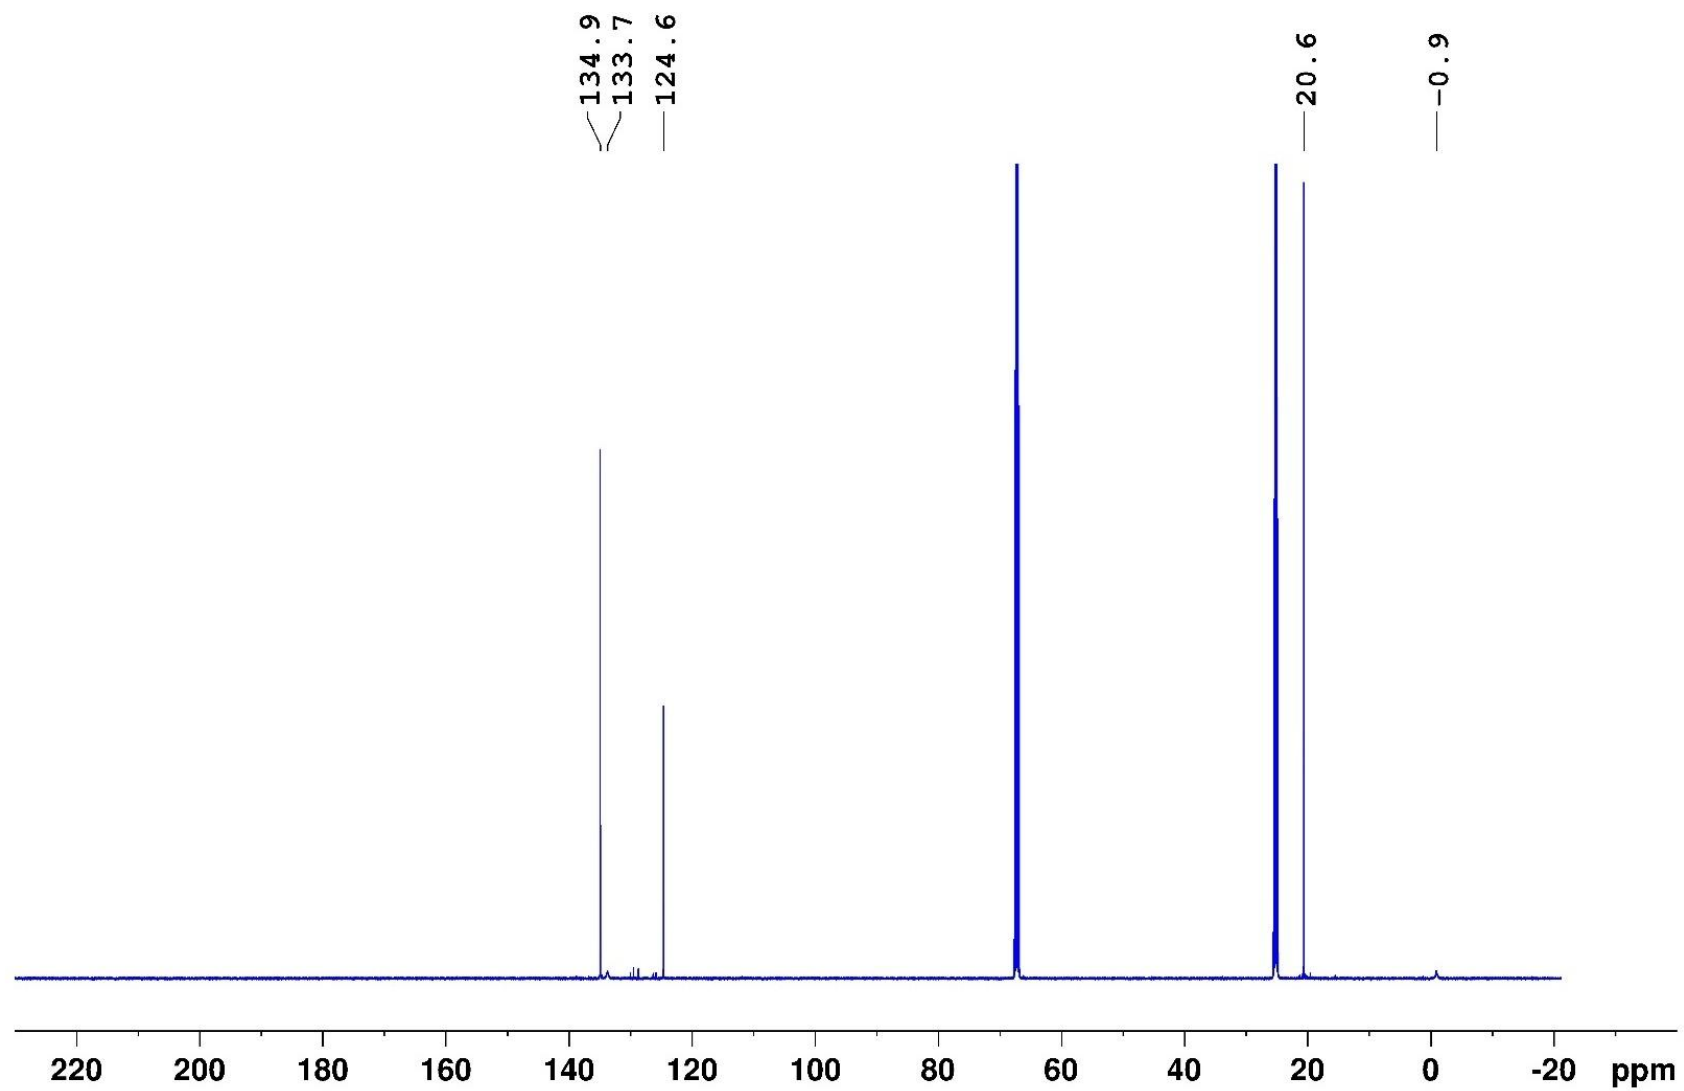

**Figure S14.**  $^{13}\text{C}\{^1\text{H}\}$  NMR spectrum of **3** in  $d_8$ -THF.

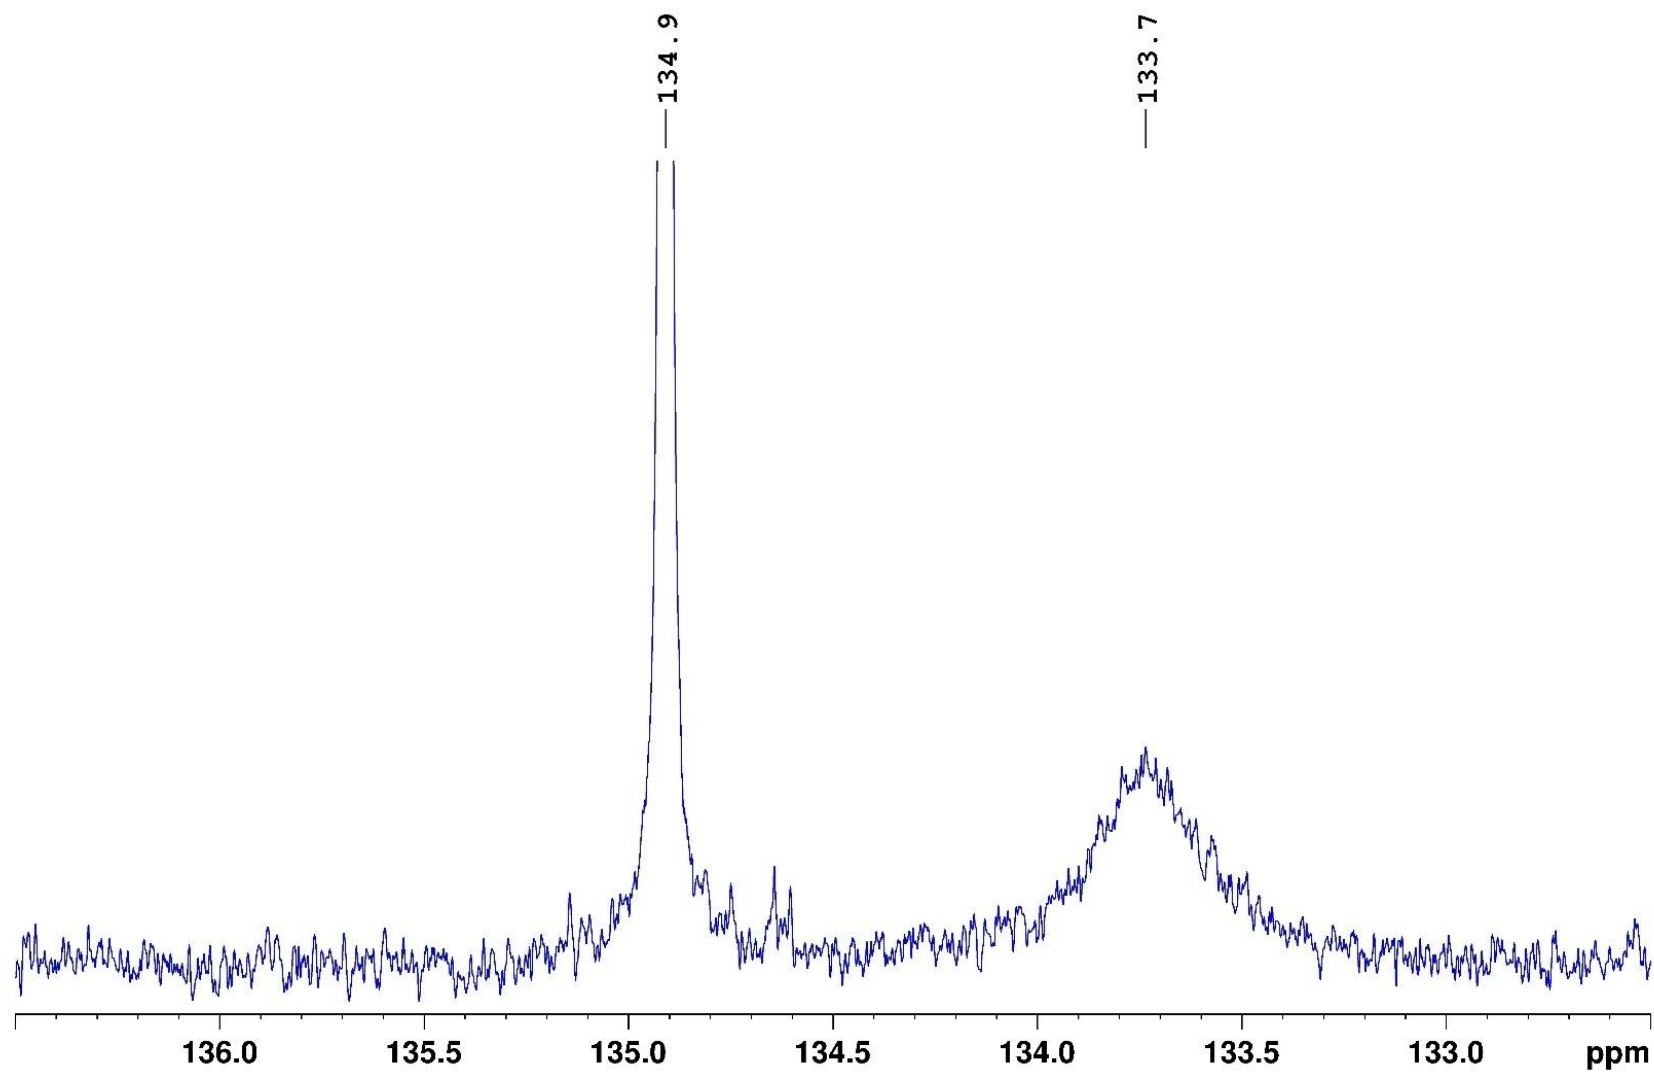

**Figure S15.** Aromatic region of the  $^{13}\text{C}\{^1\text{H}\}$  NMR spectrum of **3** in  $d_8$ -THF.

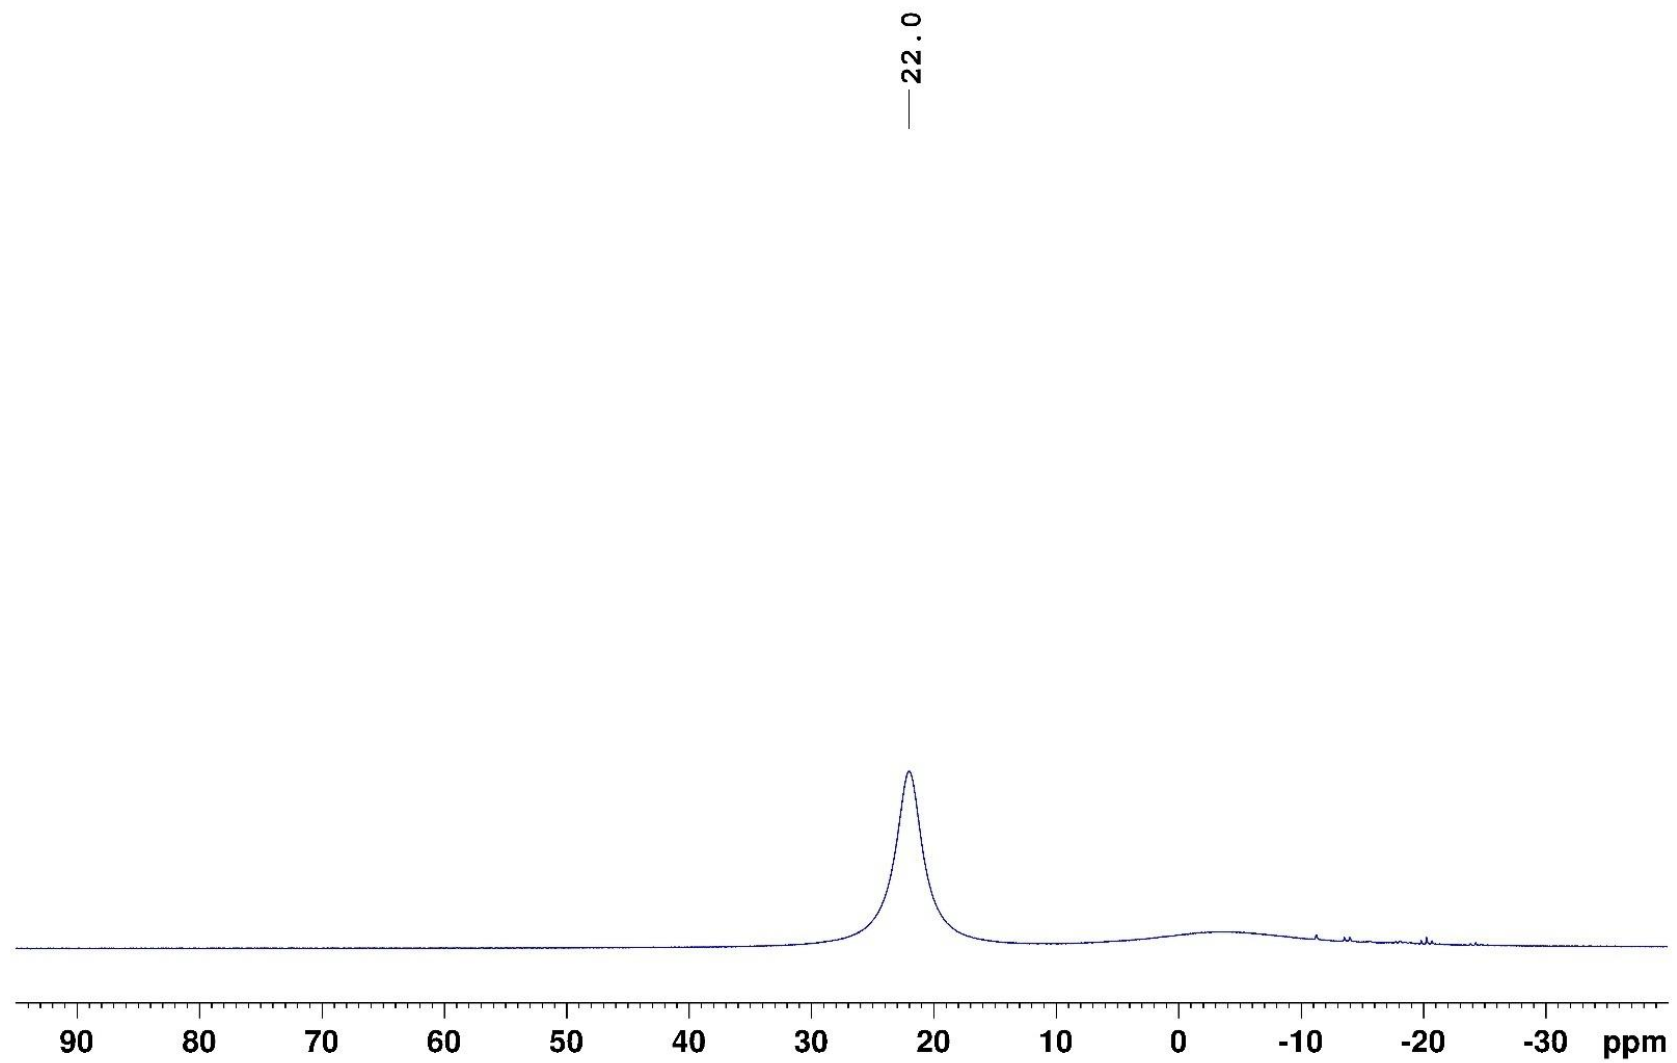

Figure S16.  $^{11}\text{B}$  NMR spectrum of **3** in  $d_8$ -THF.

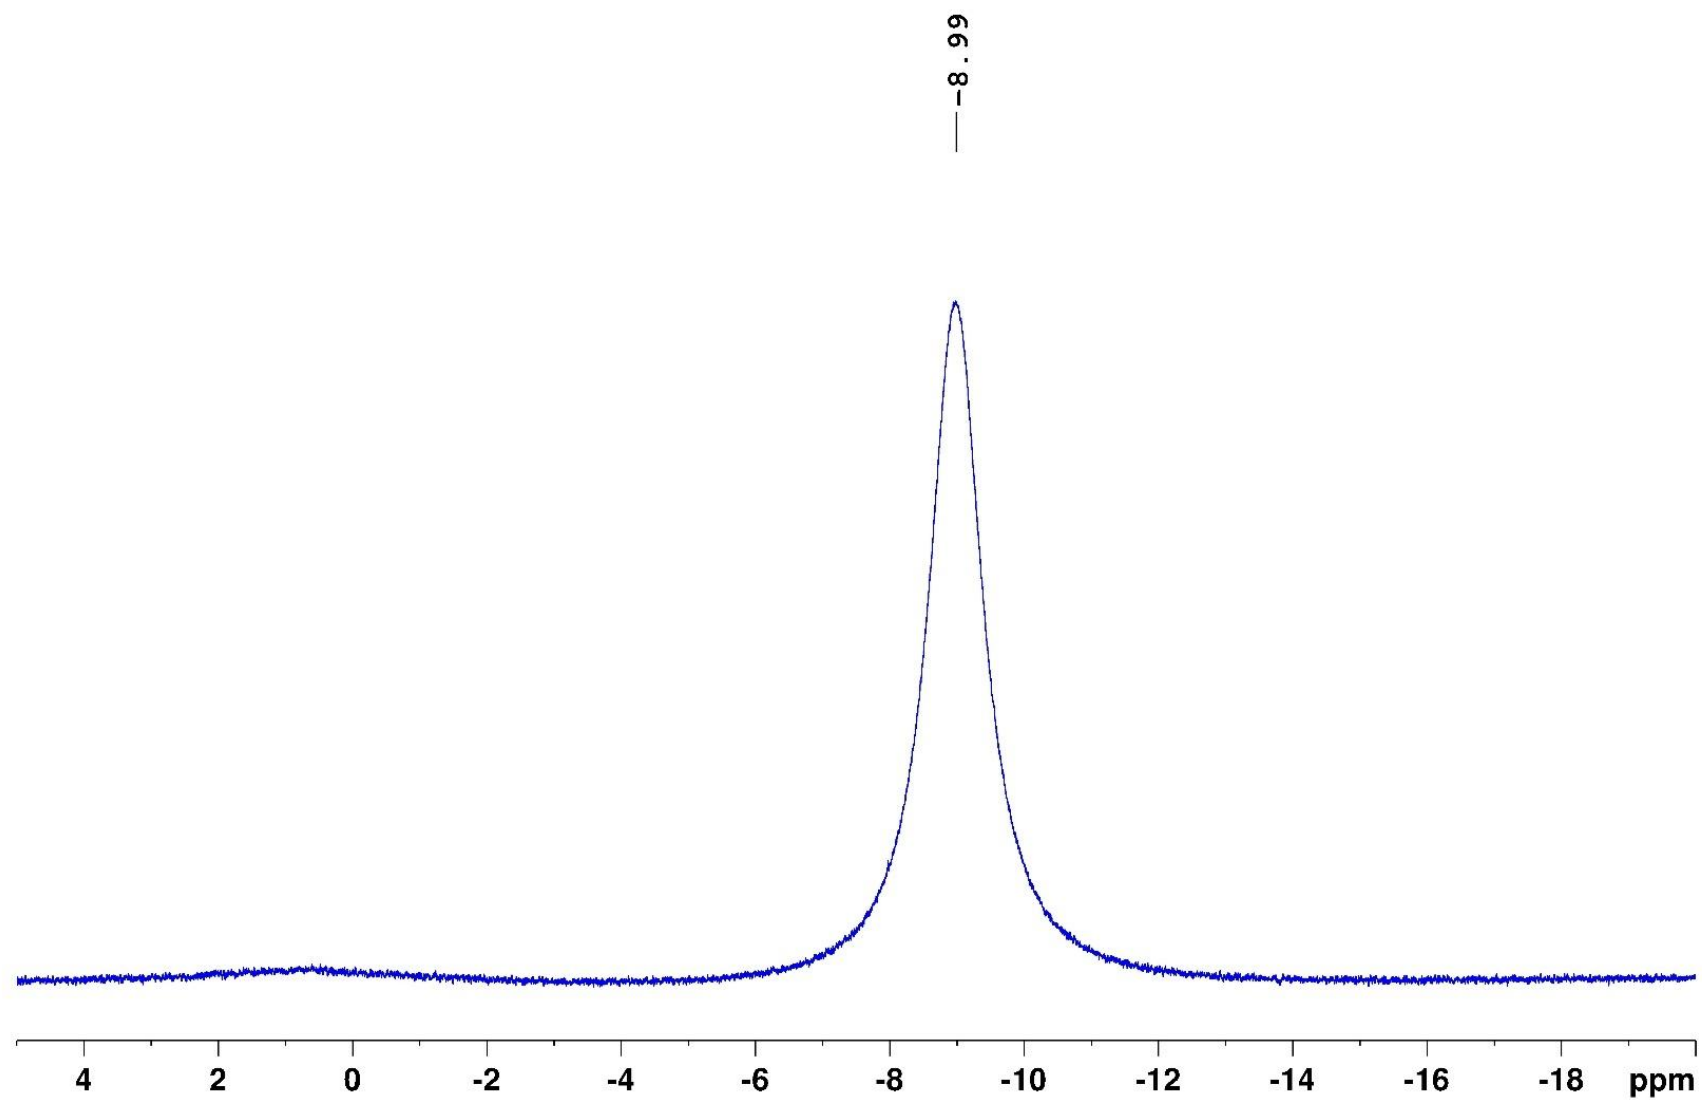

**Figure S17.**  ${}^7\text{Li}\{^1\text{H}\}$  NMR spectrum of **3** in  $d_8$ -THF.

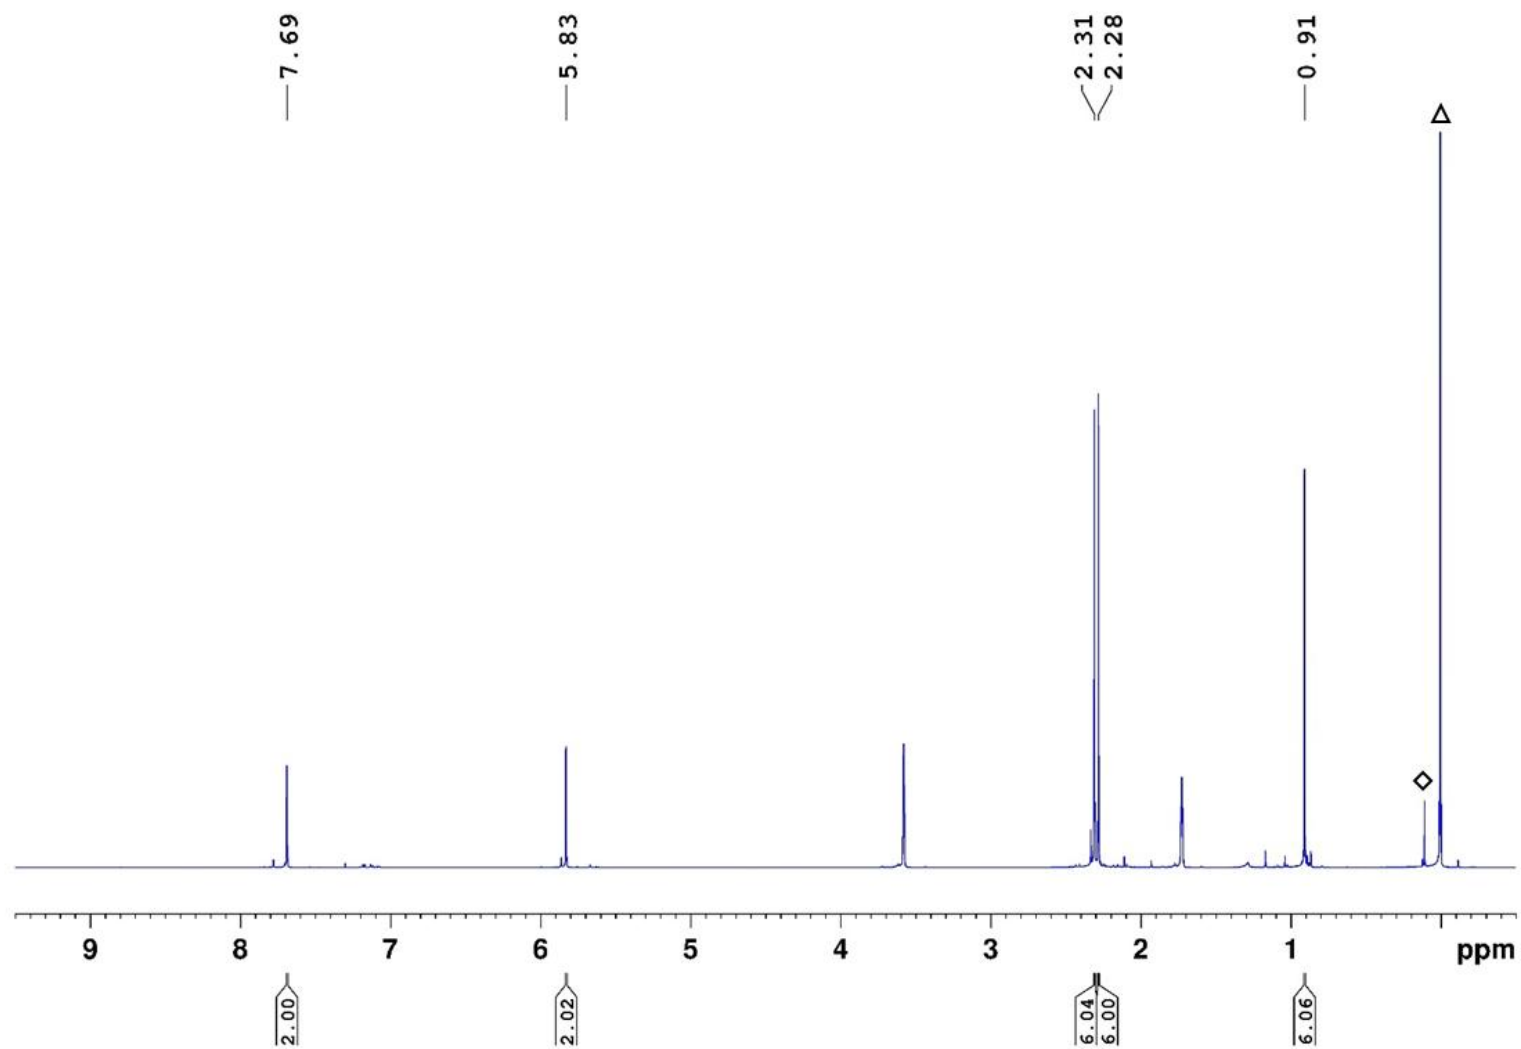

**Figure S18.**  $^1\text{H}$  NMR spectrum of **2-Cr** in  $d_8$ -THF. The resonance marked  $\diamond$  belongs to silicon grease, that marked  $\Delta$  to the internal standard tetramethylsilane (TMS).

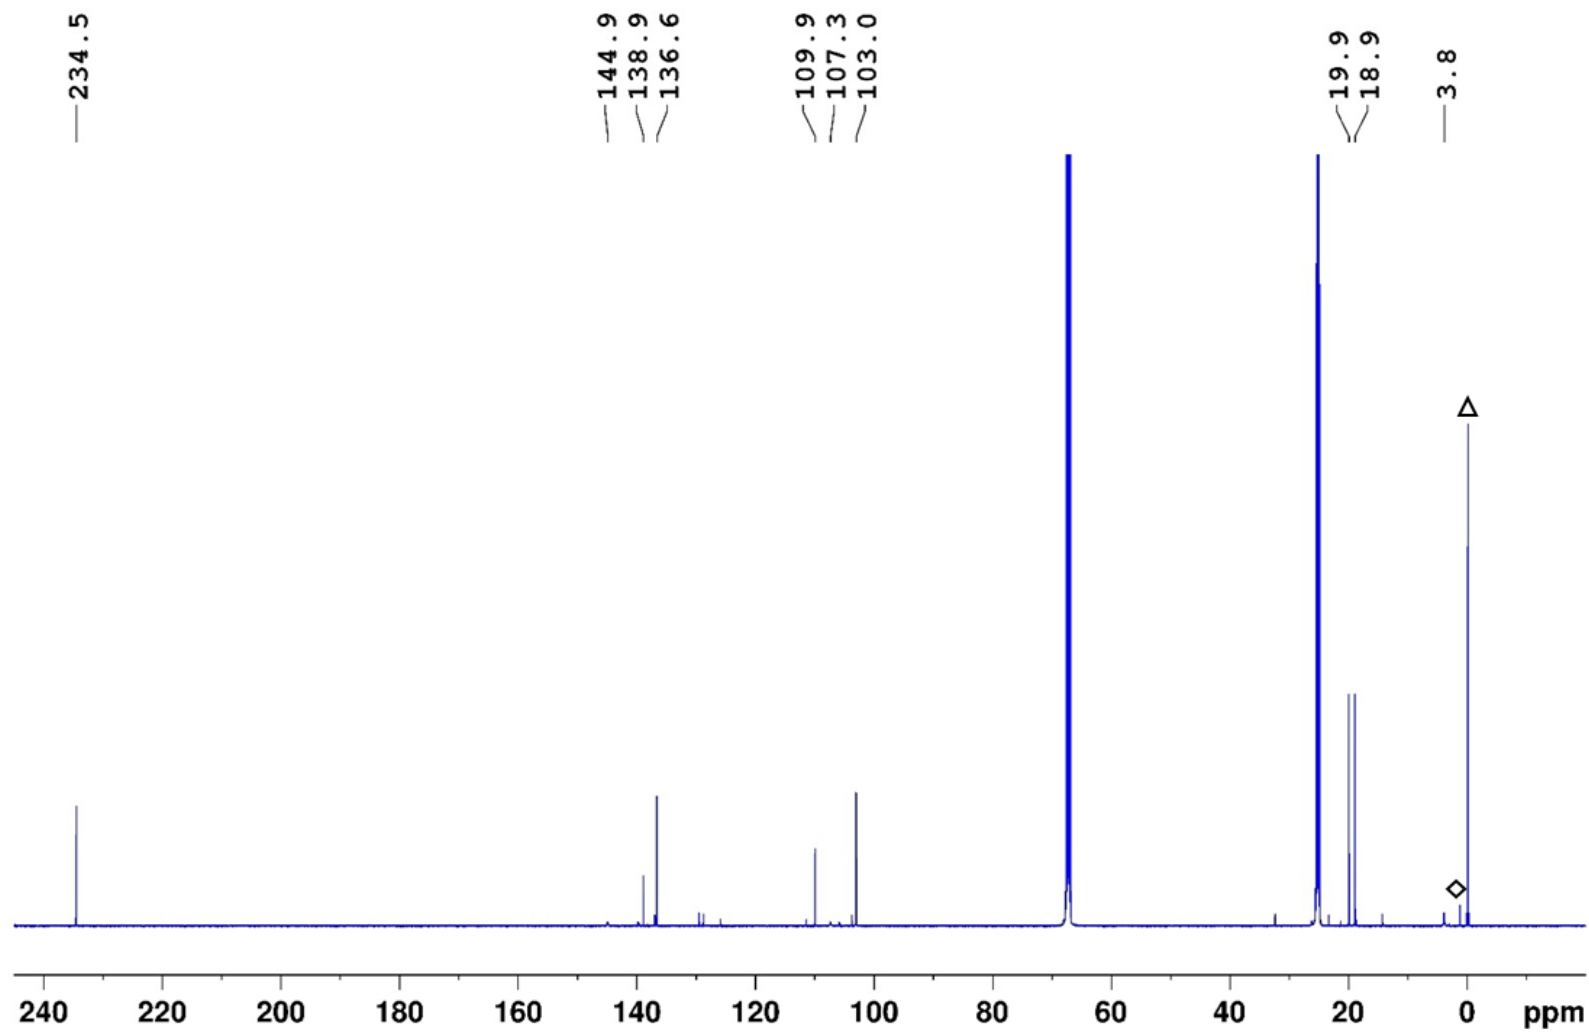

**Figure S19.**  $^{13}\text{C}\{^1\text{H}\}$  NMR spectrum of 2-Cr in  $d_8$ -THF. The resonance marked  $\diamond$  belongs to silicon grease, that marked  $\Delta$  to the internal standard TMS.

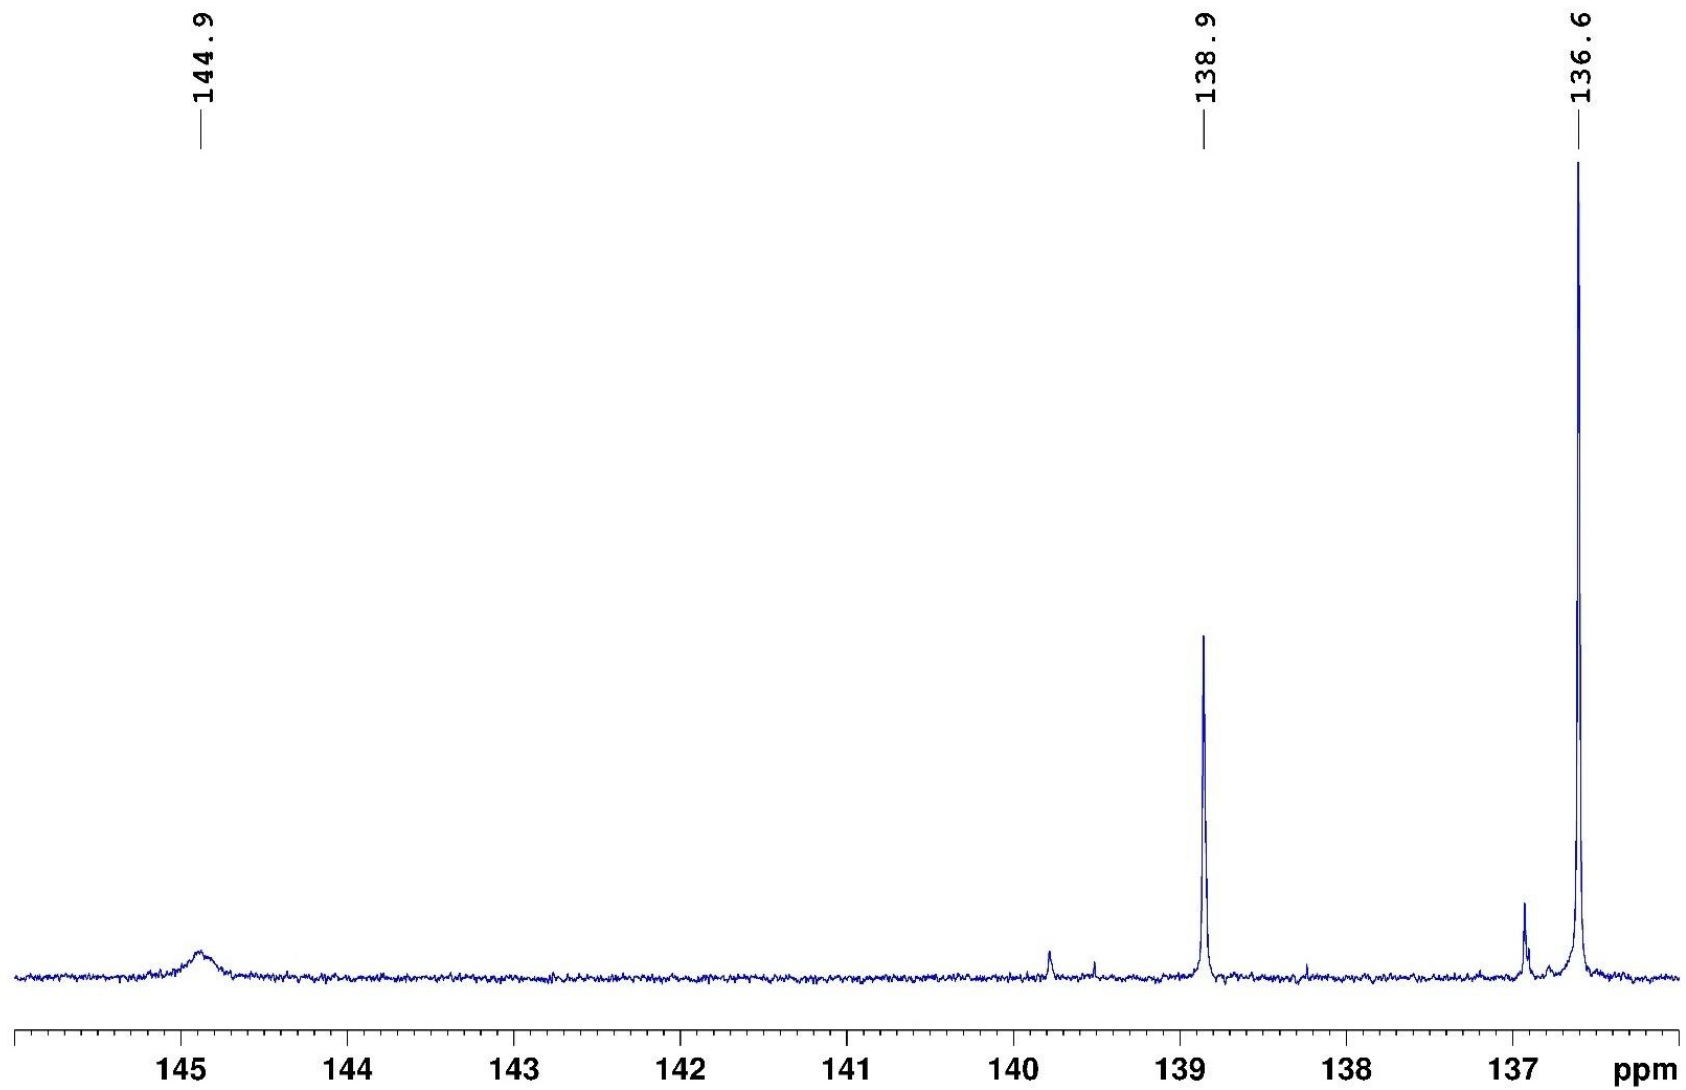

**Figure S20.** Aromatic region of the  $^{13}\text{C}\{^1\text{H}\}$  NMR spectrum of 2-Cr in  $d_8$ -THF.

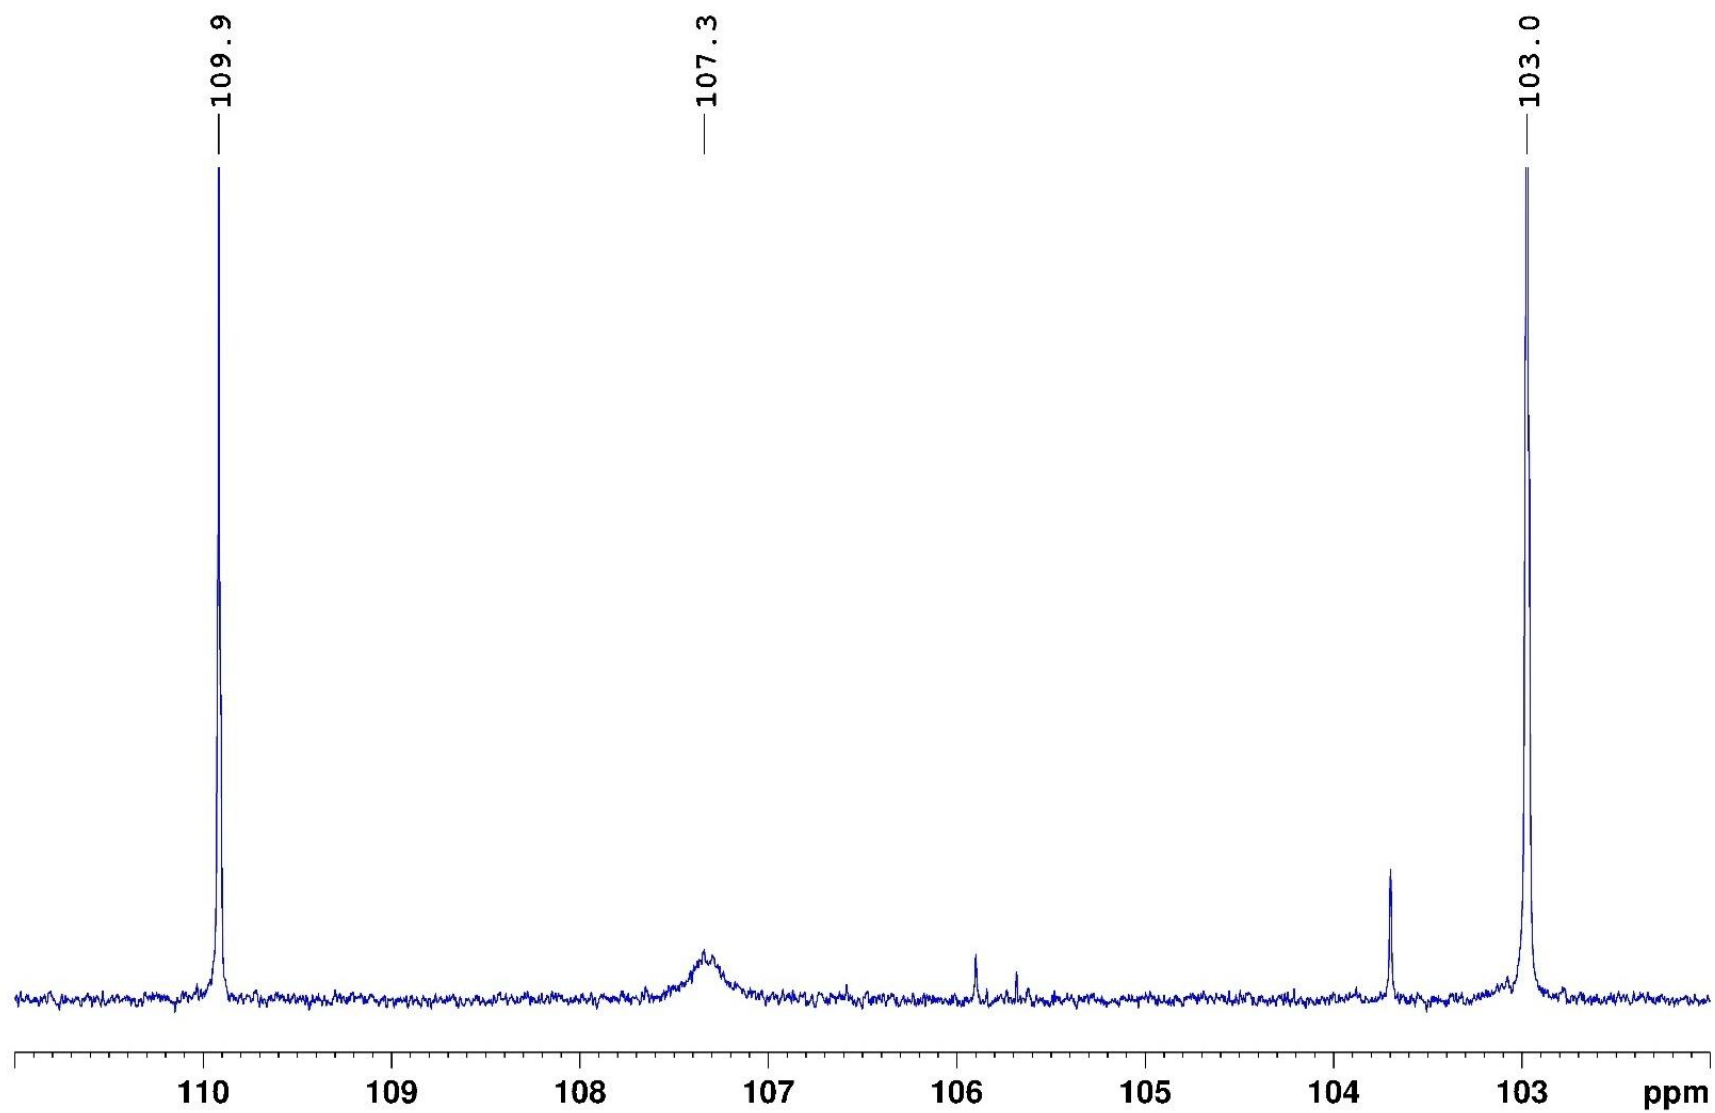

**Figure S21.** Aromatic region of the  $^{13}\text{C}\{^1\text{H}\}$  NMR spectrum of 2-Cr in  $d_8$ -THF.

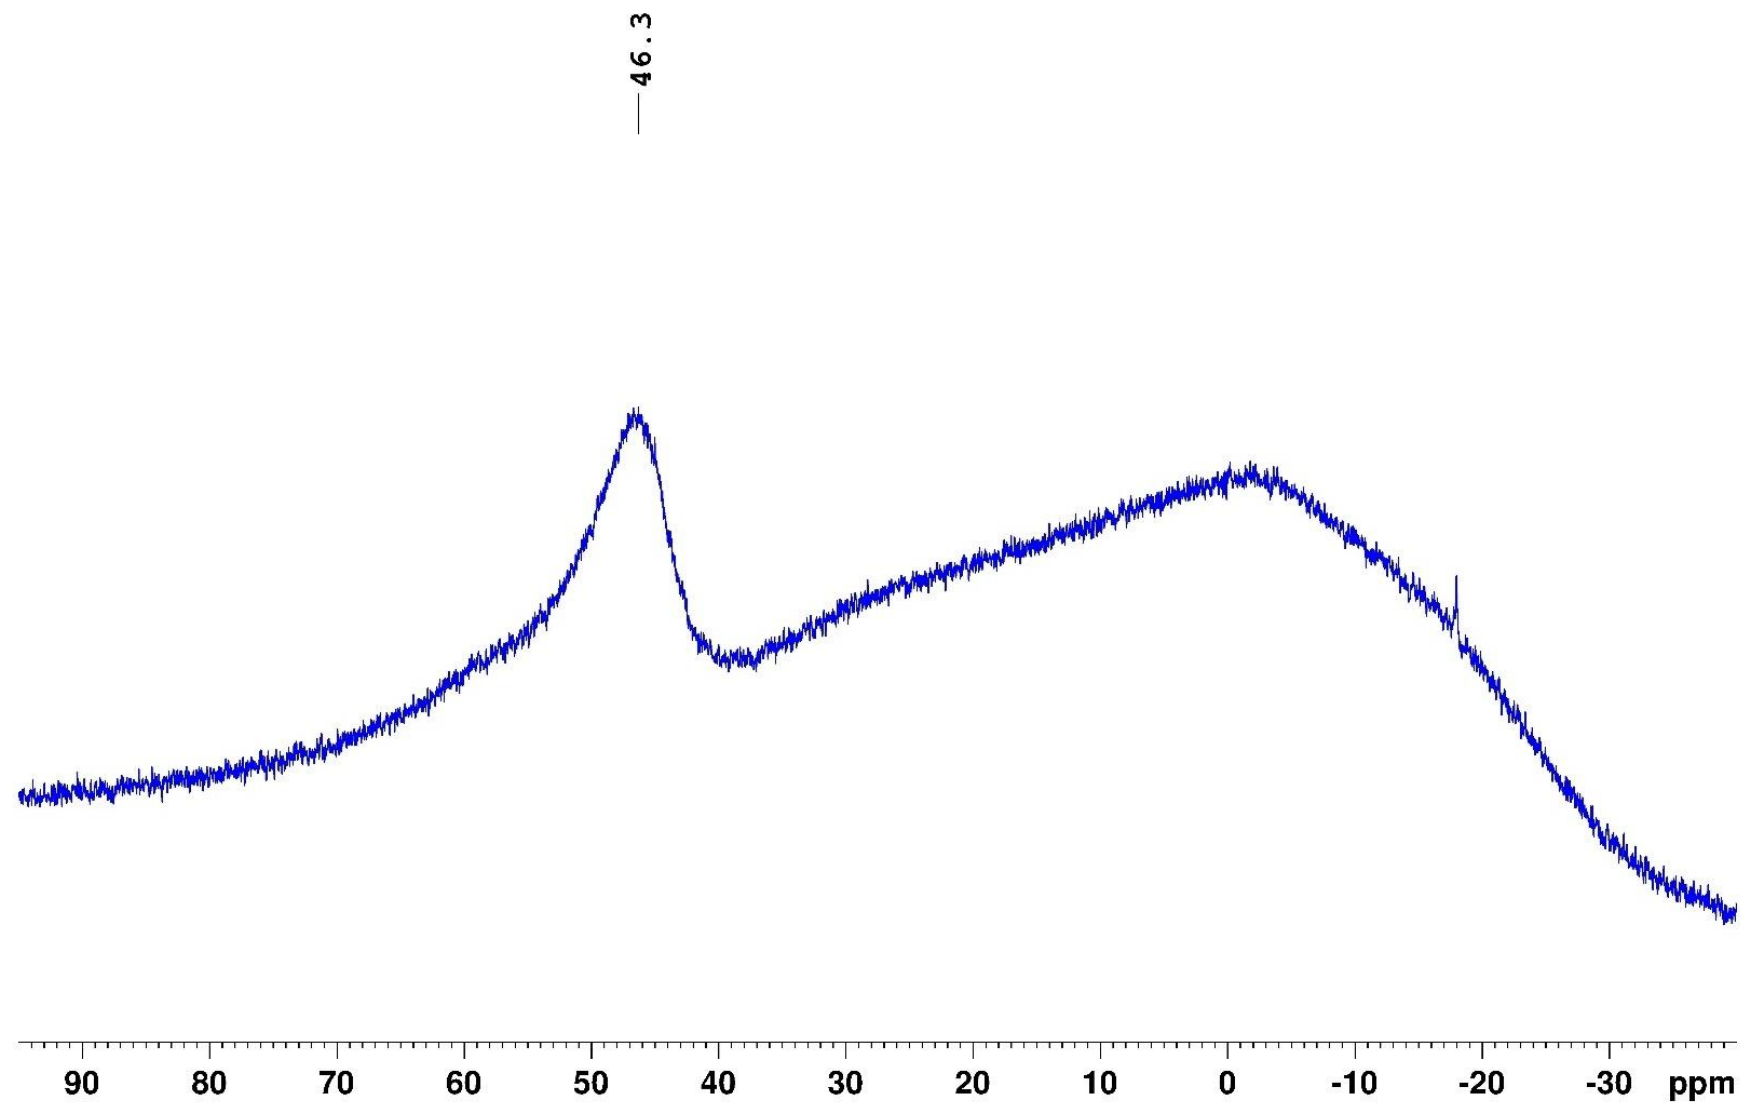

Figure S22.  $^{11}\text{B}\{^1\text{H}\}$  NMR spectrum of 2-Cr in  $d_8$ -THF.

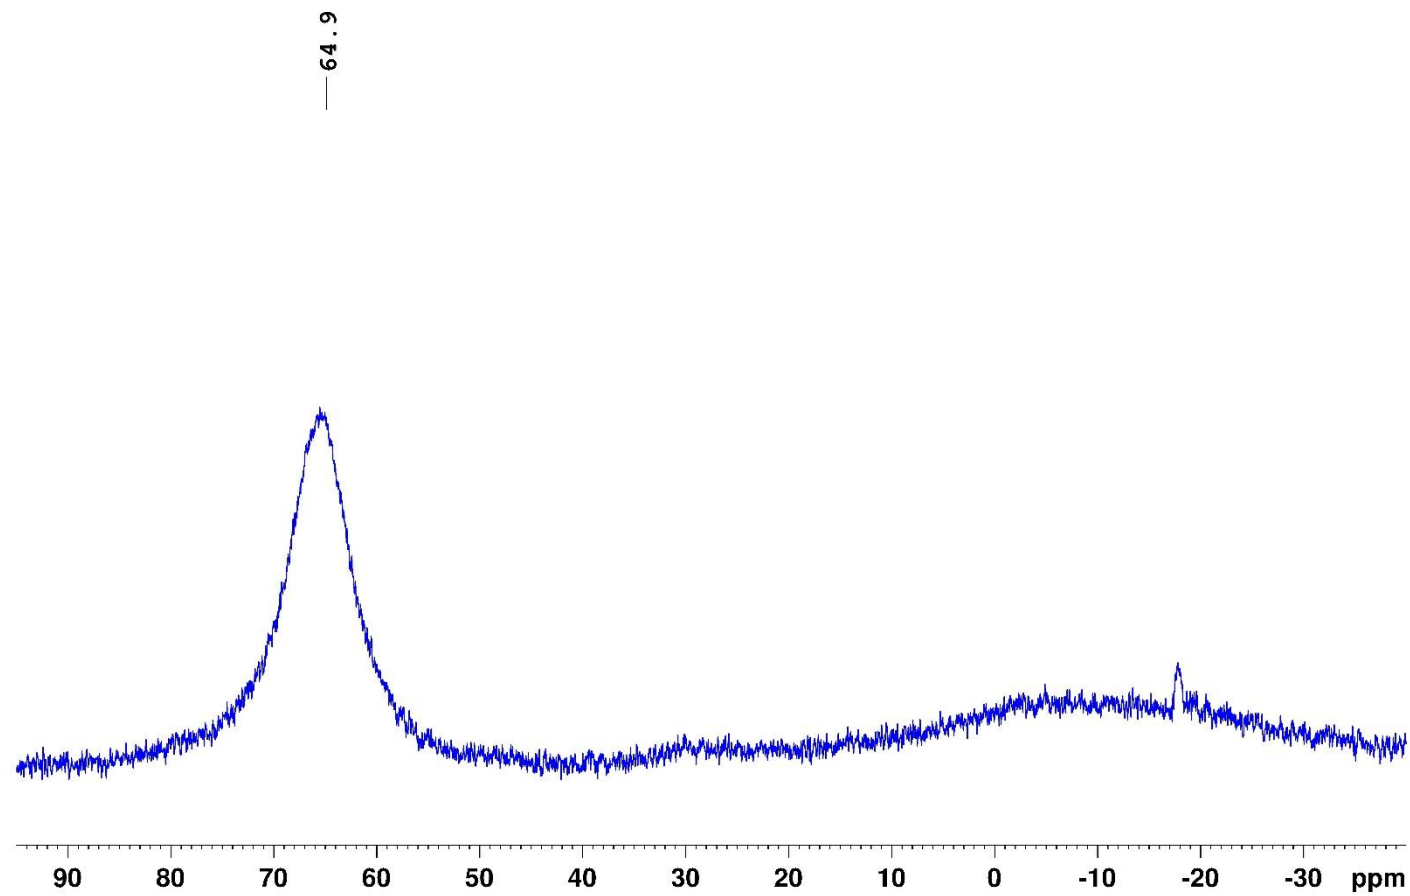

**Figure S23.**  $^{11}\text{B}$  NMR spectrum of 2-Cr in  $\text{C}_6\text{D}_6$ .

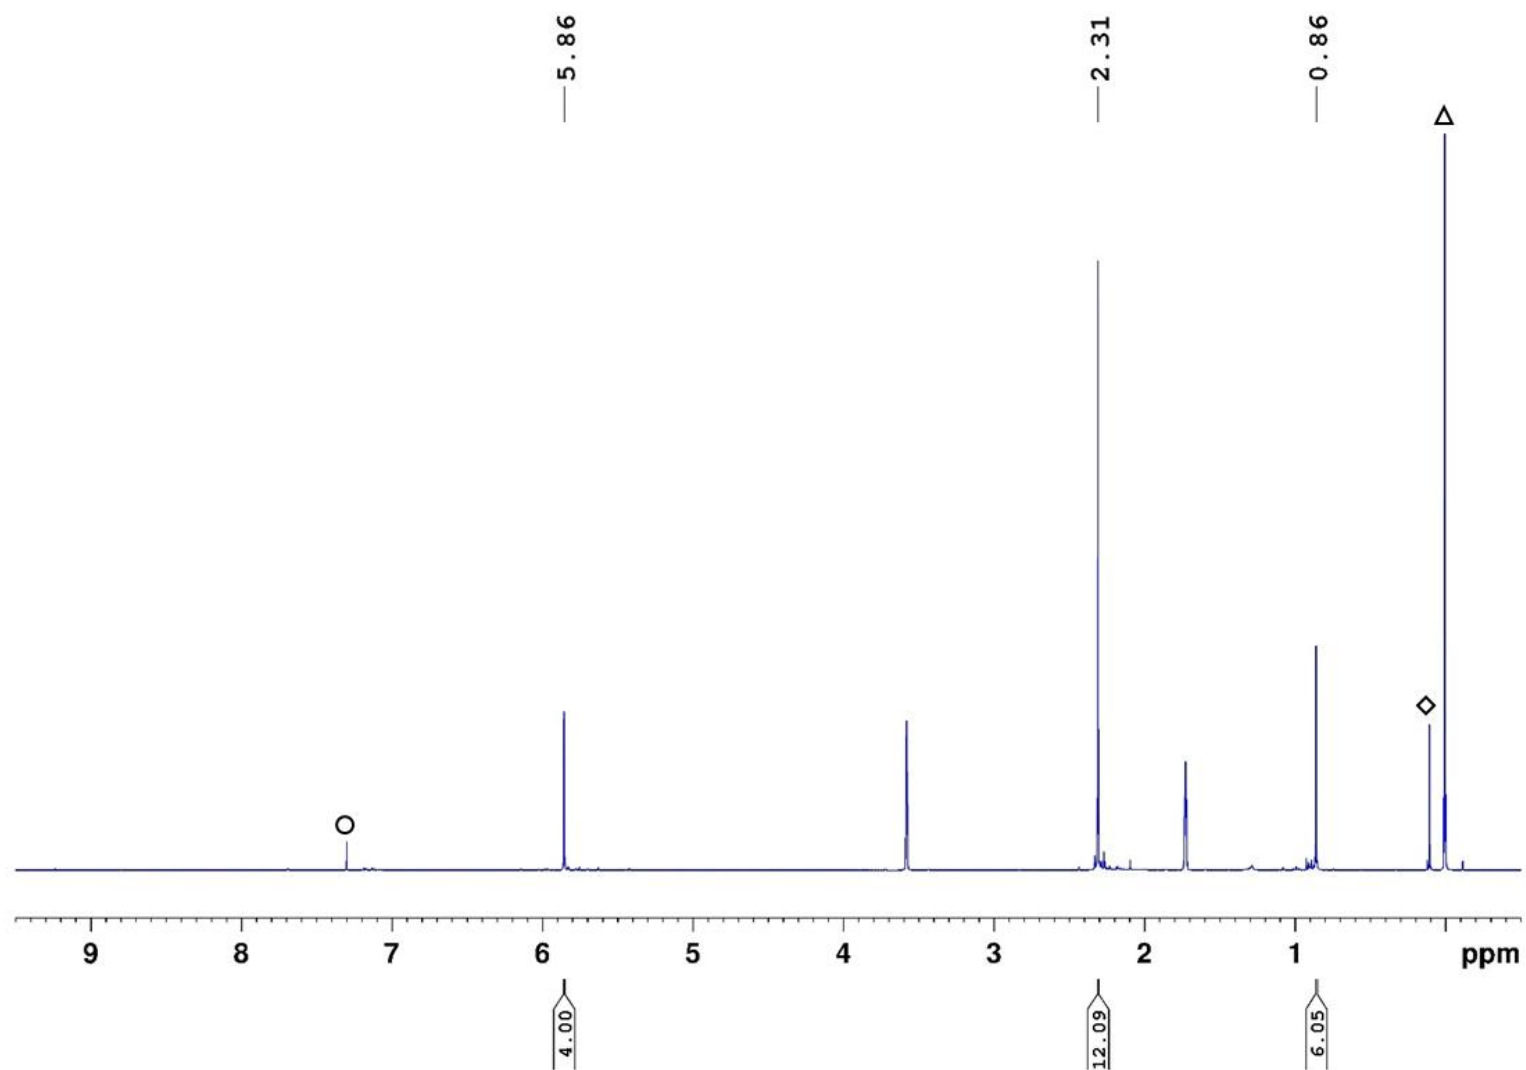

**Figure S24.**  $^1\text{H}$  NMR spectrum of  $2\text{-Cr}_2$  in  $d_8\text{-THF}$ . The resonance marked  $\circ$  belongs to residual benzene solvent, that marked  $\diamond$  to silicon grease, and that marked  $\Delta$  to the internal standard TMS.

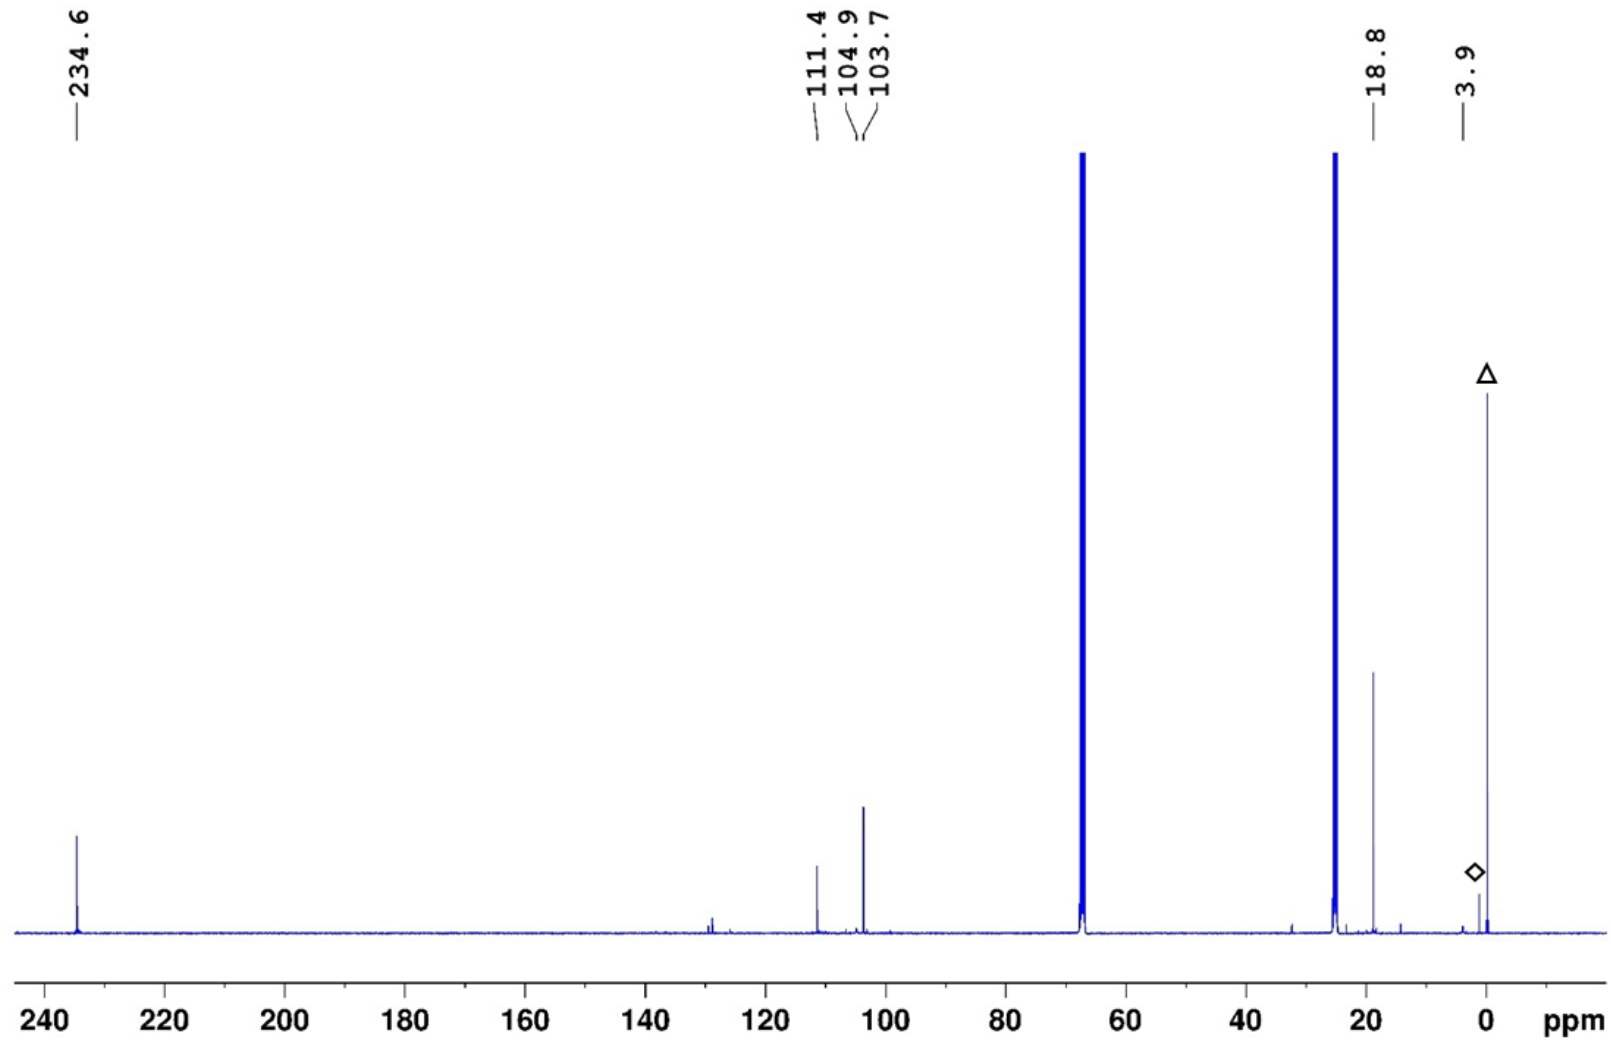

**Figure S25.**  $^{13}\text{C}\{^1\text{H}\}$  NMR spectrum of **2-Cr<sub>2</sub>** in  $d_8$ -THF. The resonance marked  $\diamond$  belongs to silicon grease, and that marked  $\Delta$  to the internal standard TMS.

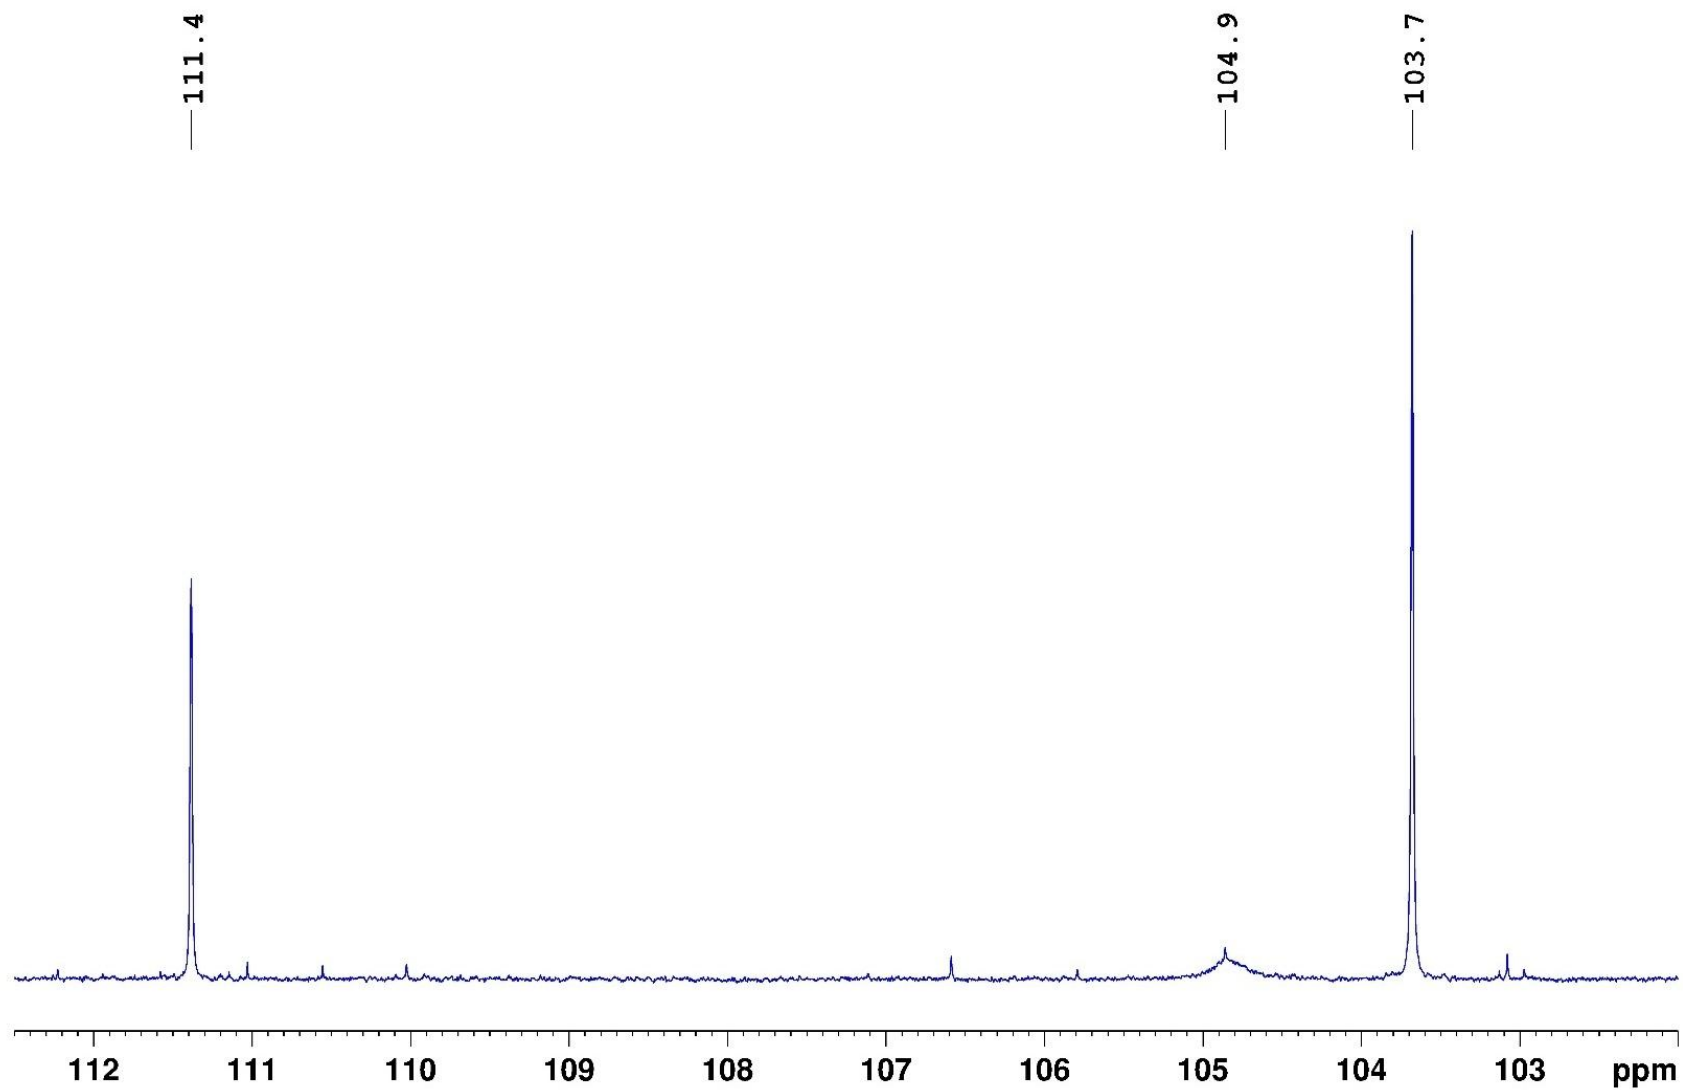

Figure S26. Aromatic region of the  $^{13}\text{C}\{^1\text{H}\}$  NMR spectrum of 2-Cr<sub>2</sub> in d<sub>8</sub>-THF.

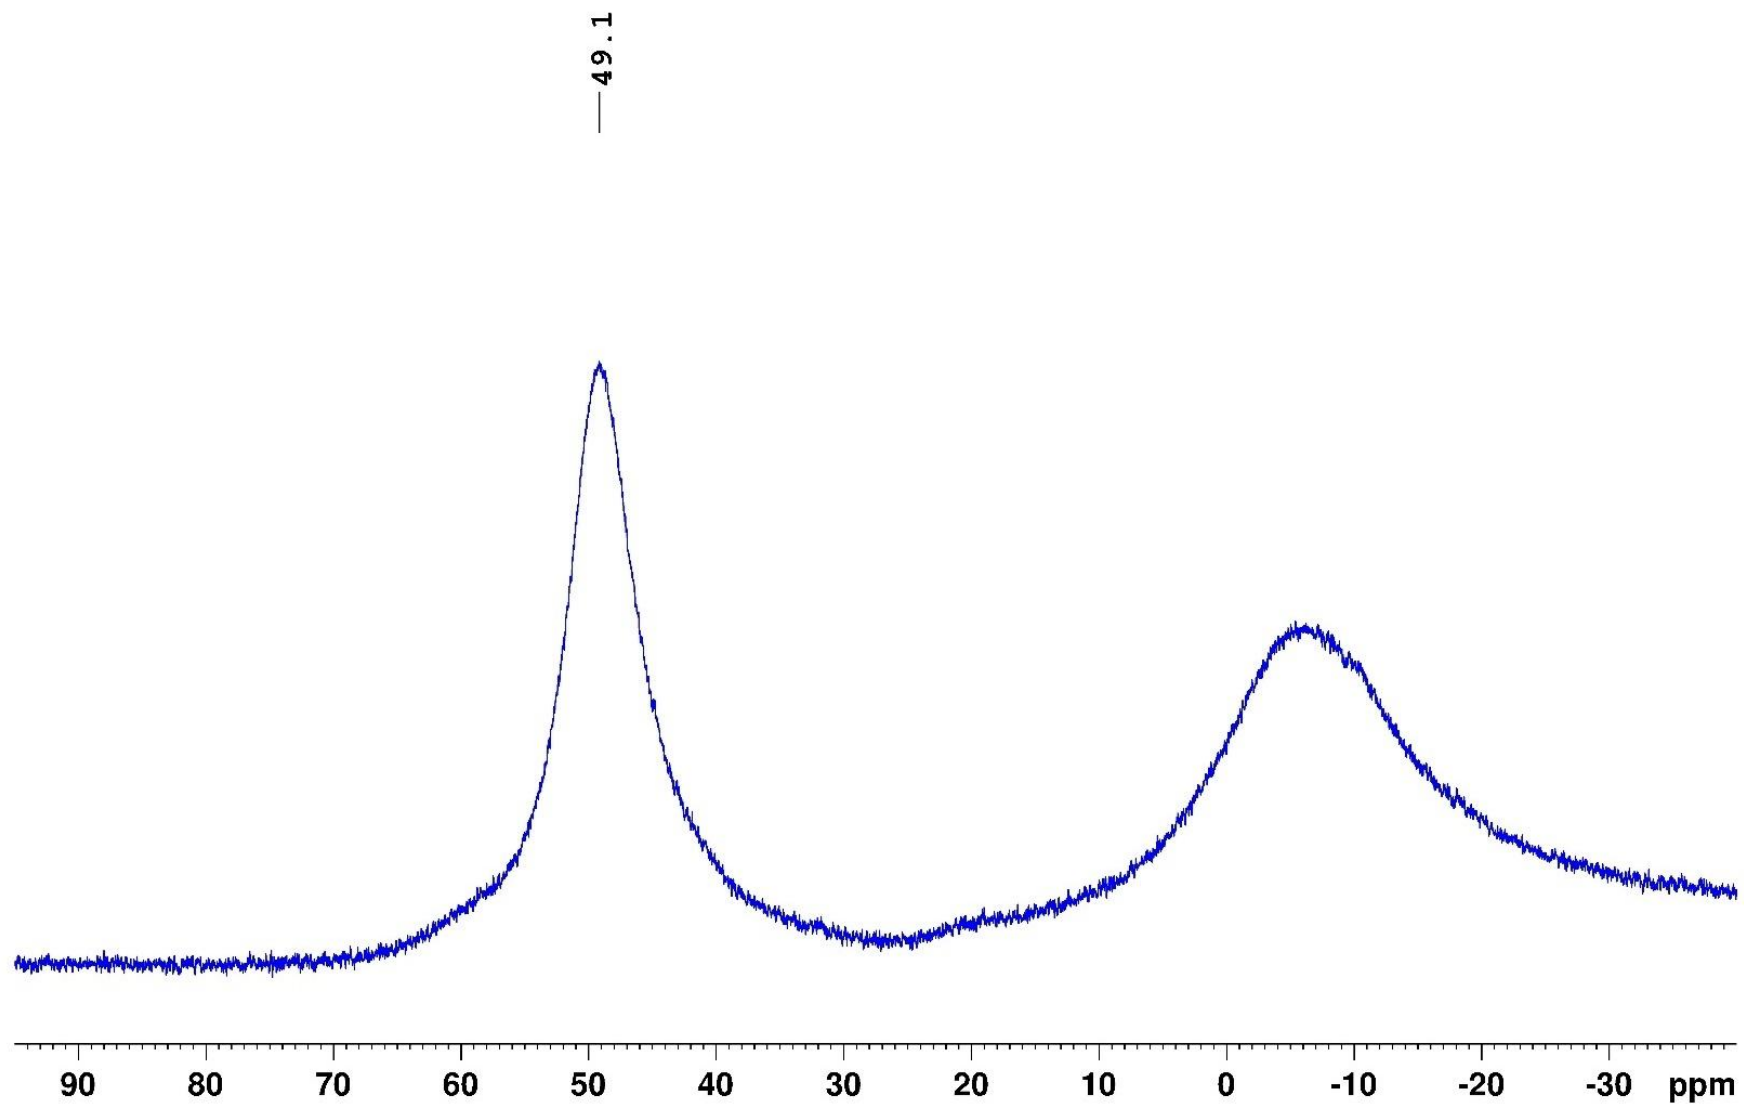

**Figure S27.**  $^{11}\text{B}$  NMR spectrum of 2-Cr<sub>2</sub> in d<sub>8</sub>-THF.

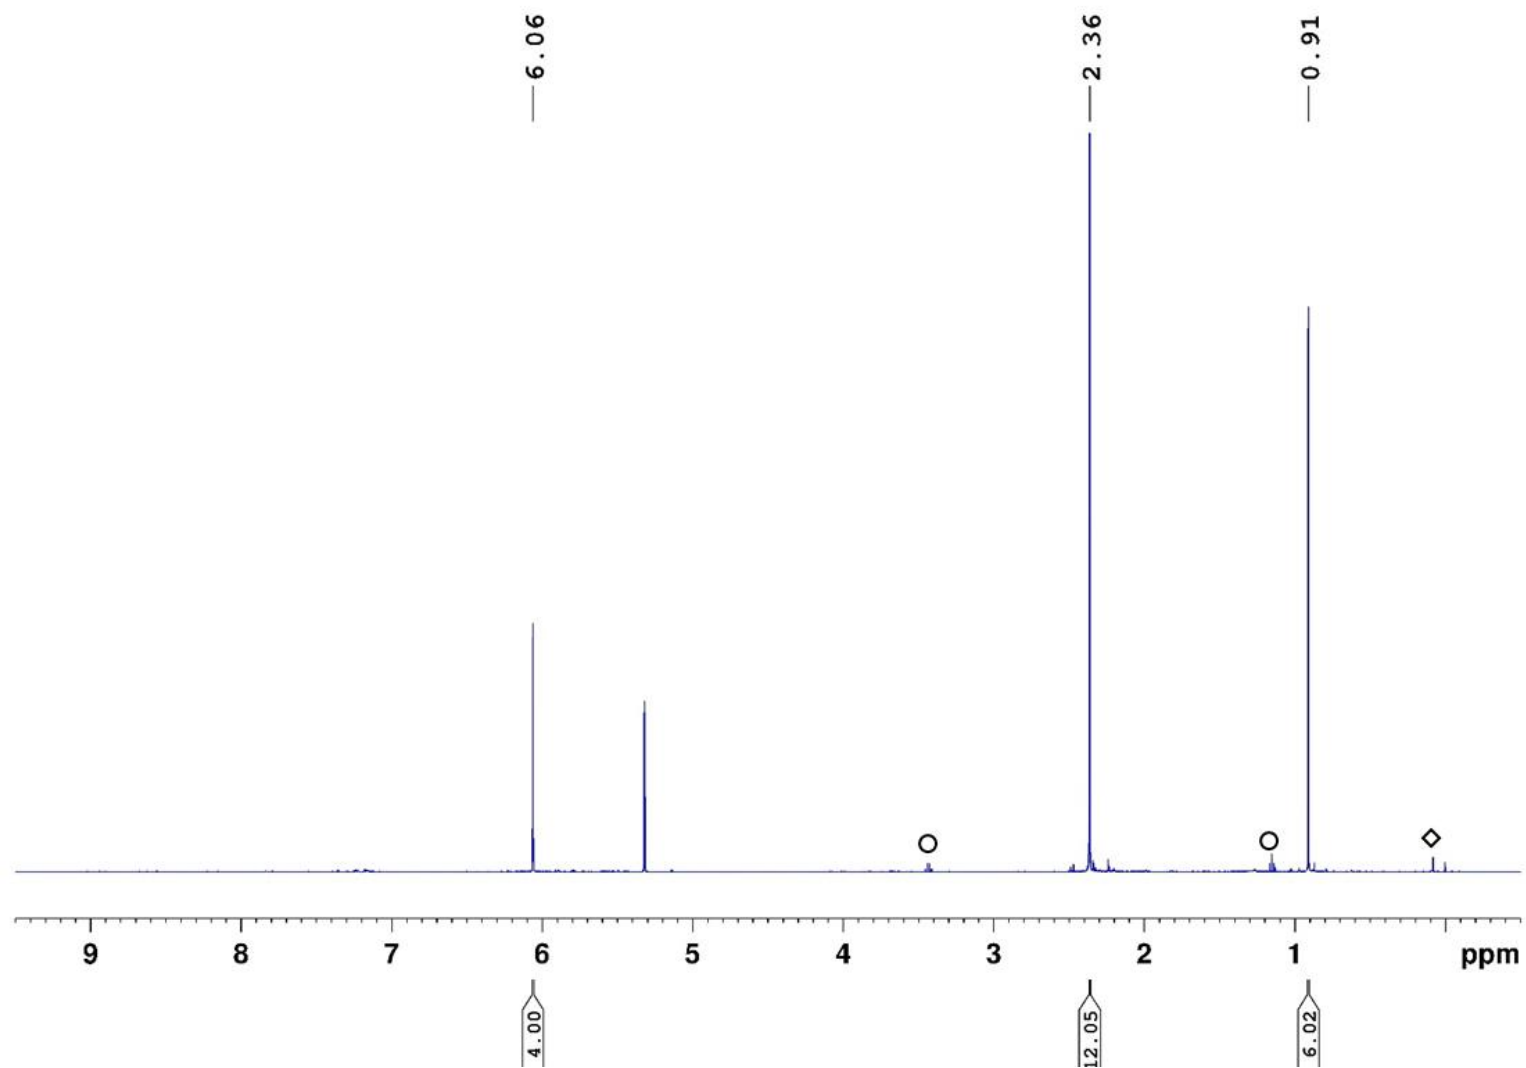

**Figure S28.**  $^1\text{H}$  NMR spectrum of **2-Mo<sub>2</sub>** in  $\text{CD}_2\text{Cl}_2$ . The resonances marked O belong to residual  $\text{Et}_2\text{O}$  solvent, and that marked  $\diamond$  to silicon grease.

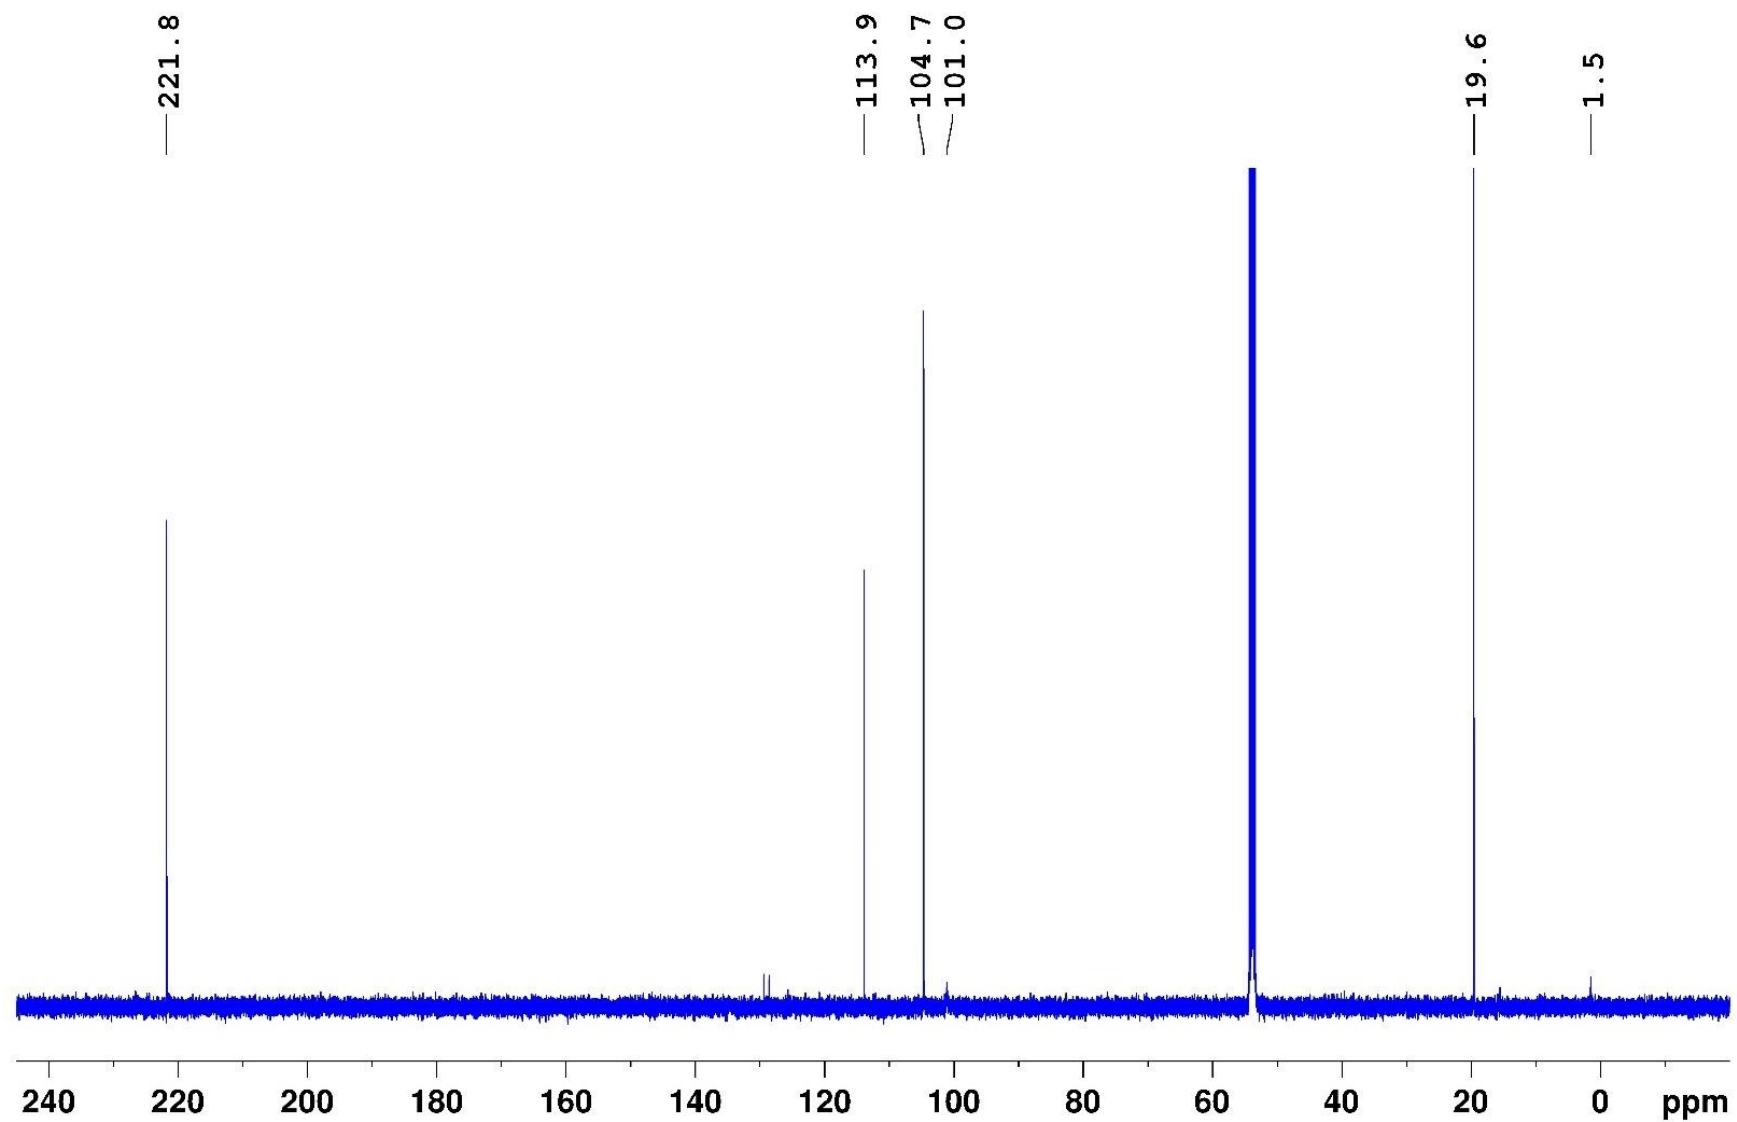

Figure S29.  $^{13}\text{C}\{^1\text{H}\}$  NMR spectrum of 2-Mo<sub>2</sub> in CD<sub>2</sub>Cl<sub>2</sub>.

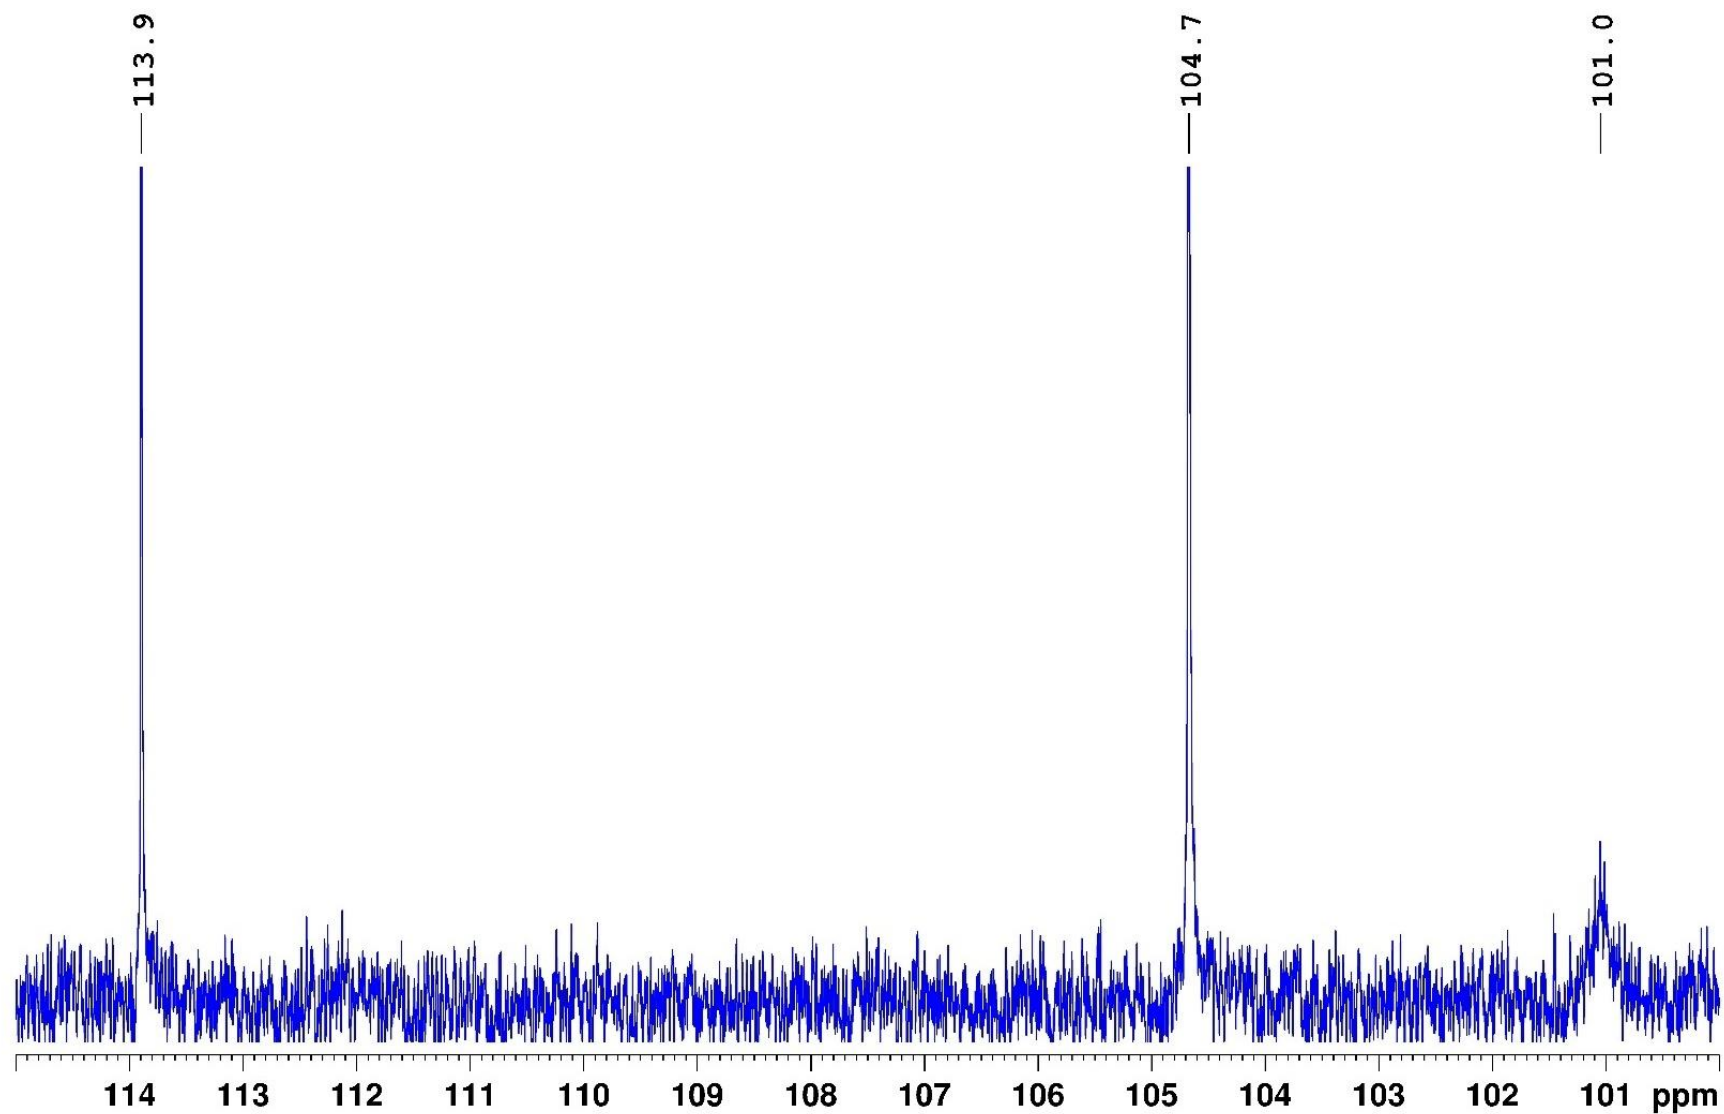

**Figure S30.** Aromatic region of the  $^{13}\text{C}\{^1\text{H}\}$  NMR spectrum of **2-Mo<sub>2</sub>** in CD<sub>2</sub>Cl<sub>2</sub>.

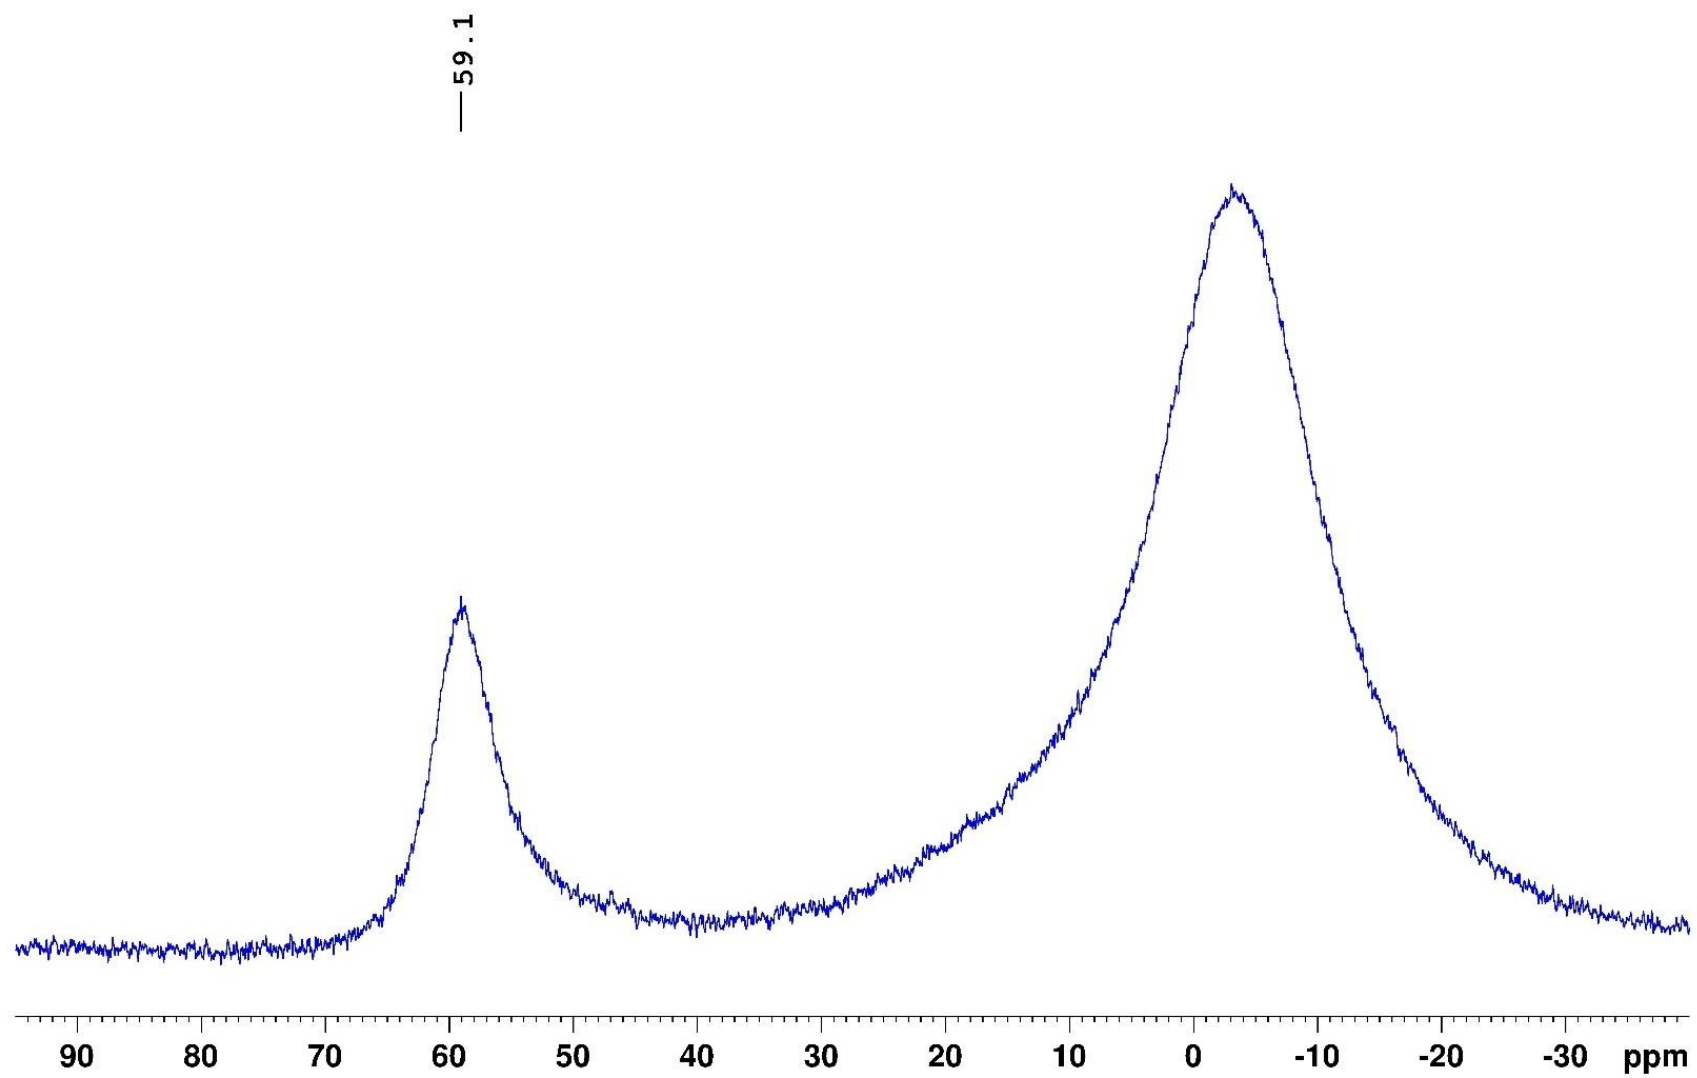

Figure S31.  $^{11}\text{B}$  NMR spectrum of 2-Mo<sub>2</sub> in CD<sub>2</sub>Cl<sub>2</sub>.

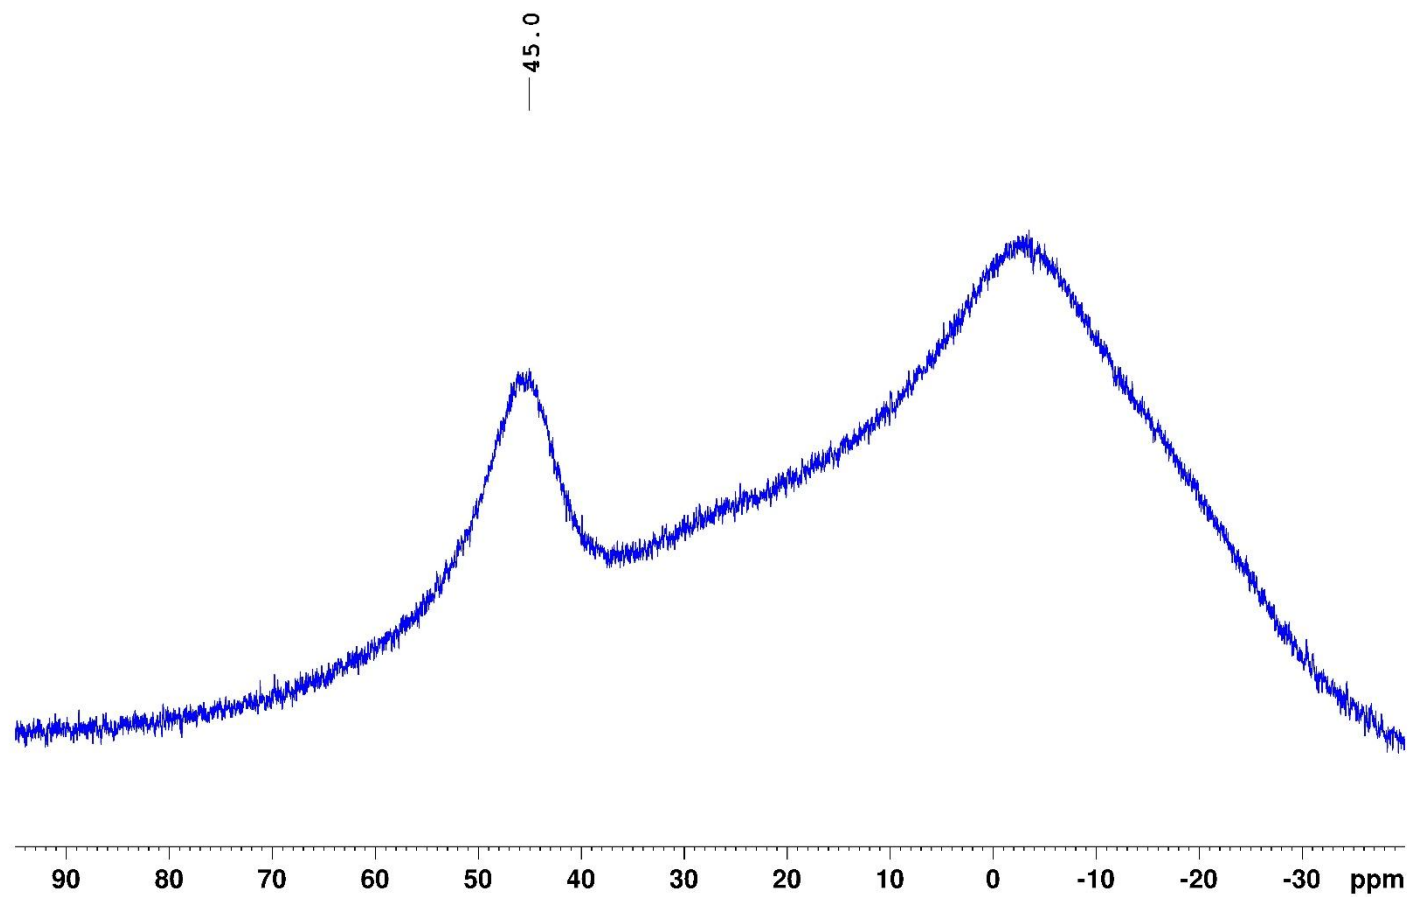

**Figure S32.**  $^{11}\text{B}$  NMR spectrum of 2-Mo<sub>2</sub> in d<sub>8</sub>-THF.

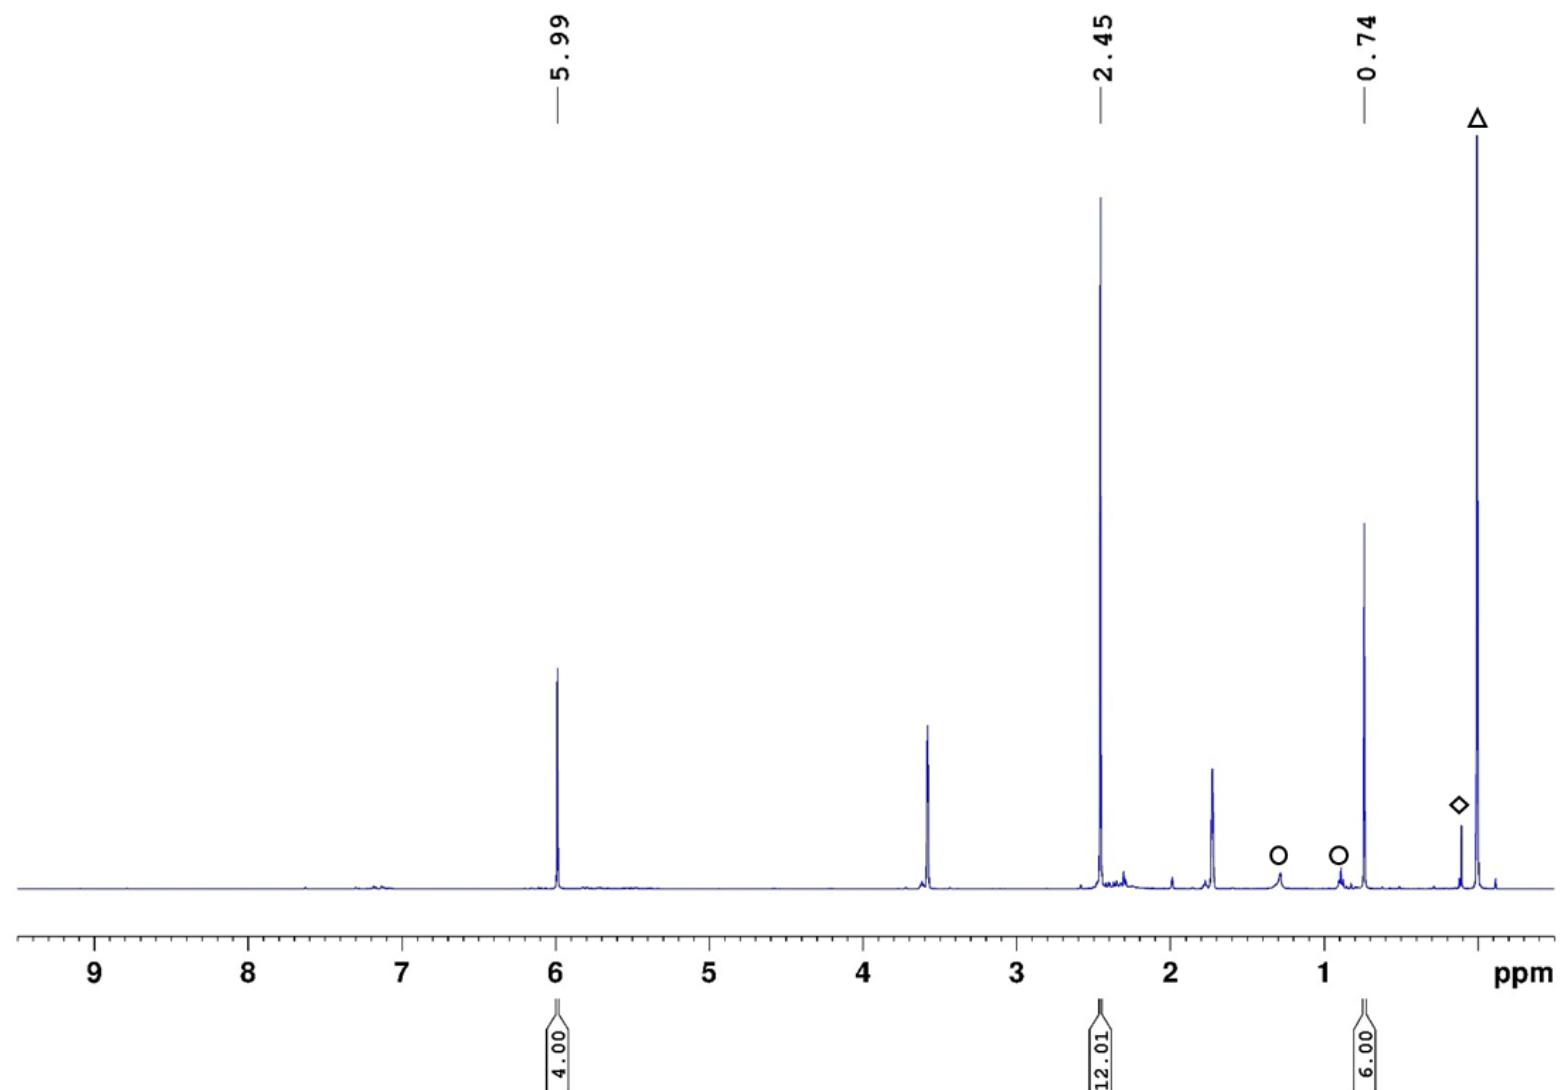

**Figure S33.**  $^1\text{H}$  NMR spectrum of **2-W<sub>2</sub>** in  $d_8$ -THF. The resonances marked  $\circ$  belong to residual hexane solvent, that marked  $\diamond$  to silicon grease, and that marked  $\Delta$  to the internal standard TMS.

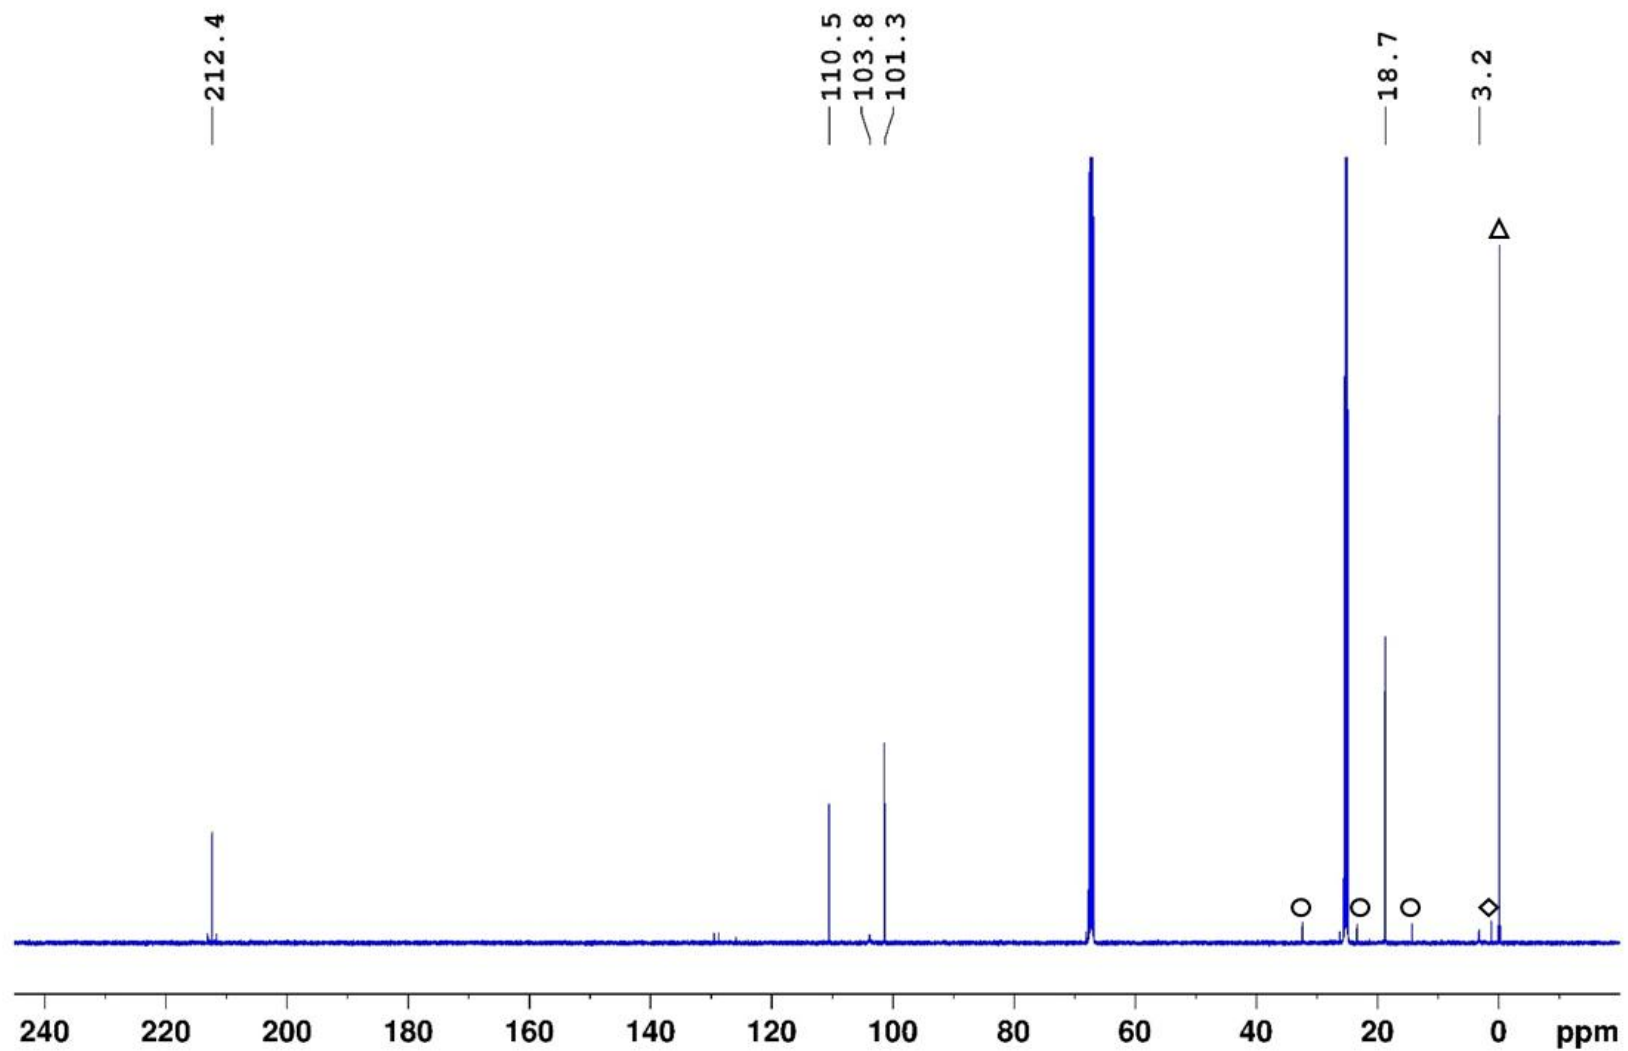

**Figure S34.**  $^{13}\text{C}\{^1\text{H}\}$  NMR spectrum of **2-W<sub>2</sub>** in  $d_8$ -THF. The resonances marked O belong to residual hexane solvent, that marked ◇ to silicon grease, and that marked Δ to the internal standard TMS.

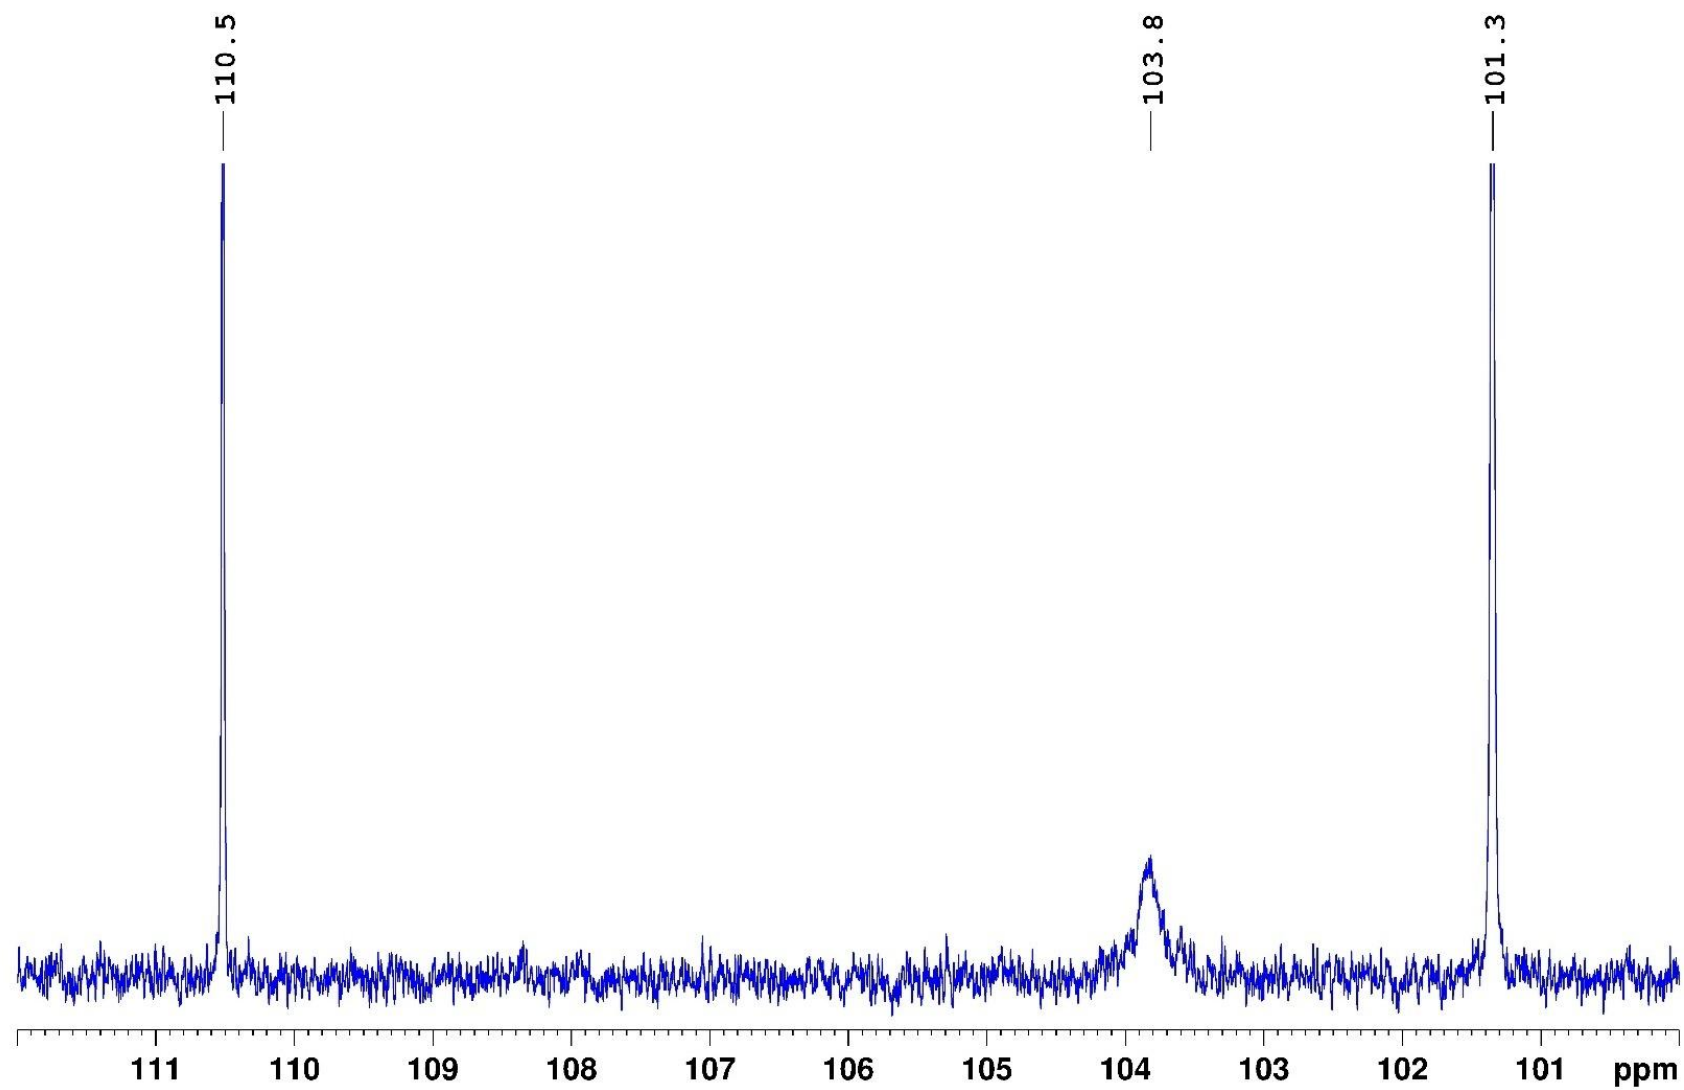

Figure S35. Aromatic region of the  $^{13}\text{C}\{^1\text{H}\}$  NMR spectrum of 2-W<sub>2</sub> in d<sub>8</sub>-THF.

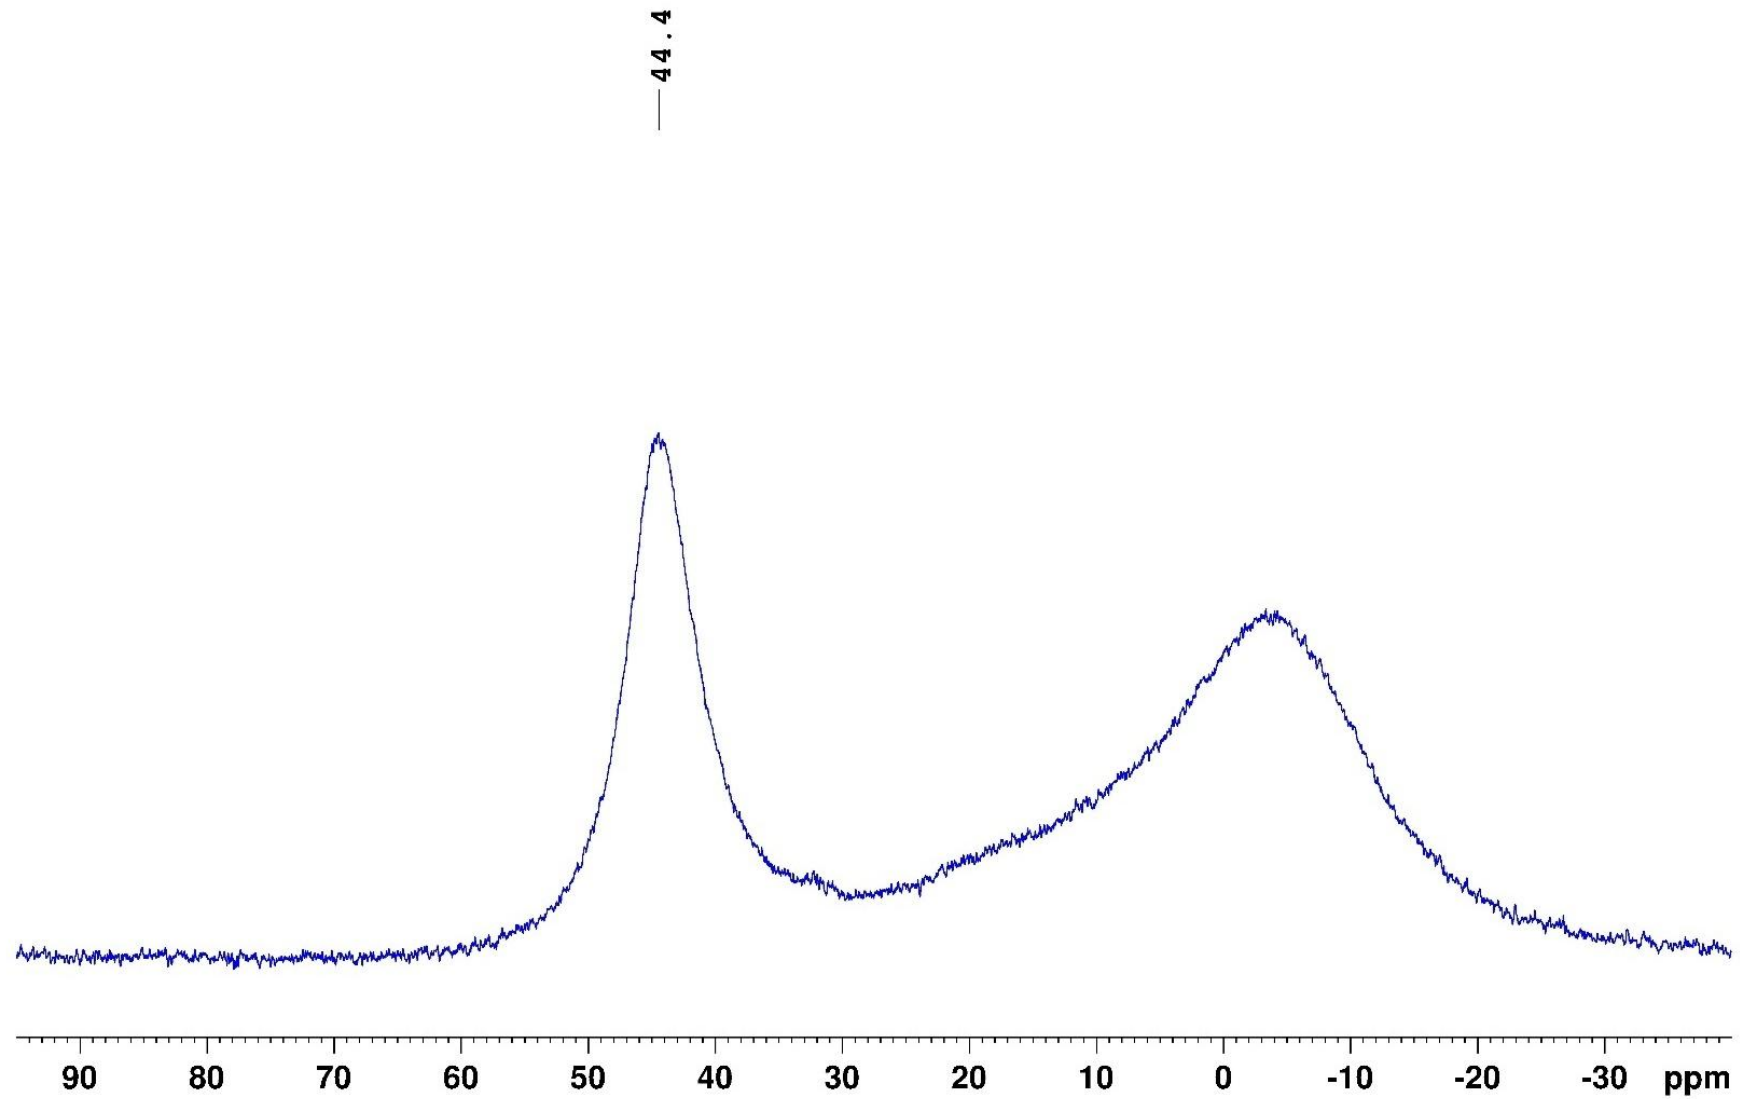

**Figure S36.**  $^{11}\text{B}\{^1\text{H}\}$  NMR spectrum of **2-W<sub>2</sub>** in  $d_8$ -THF.

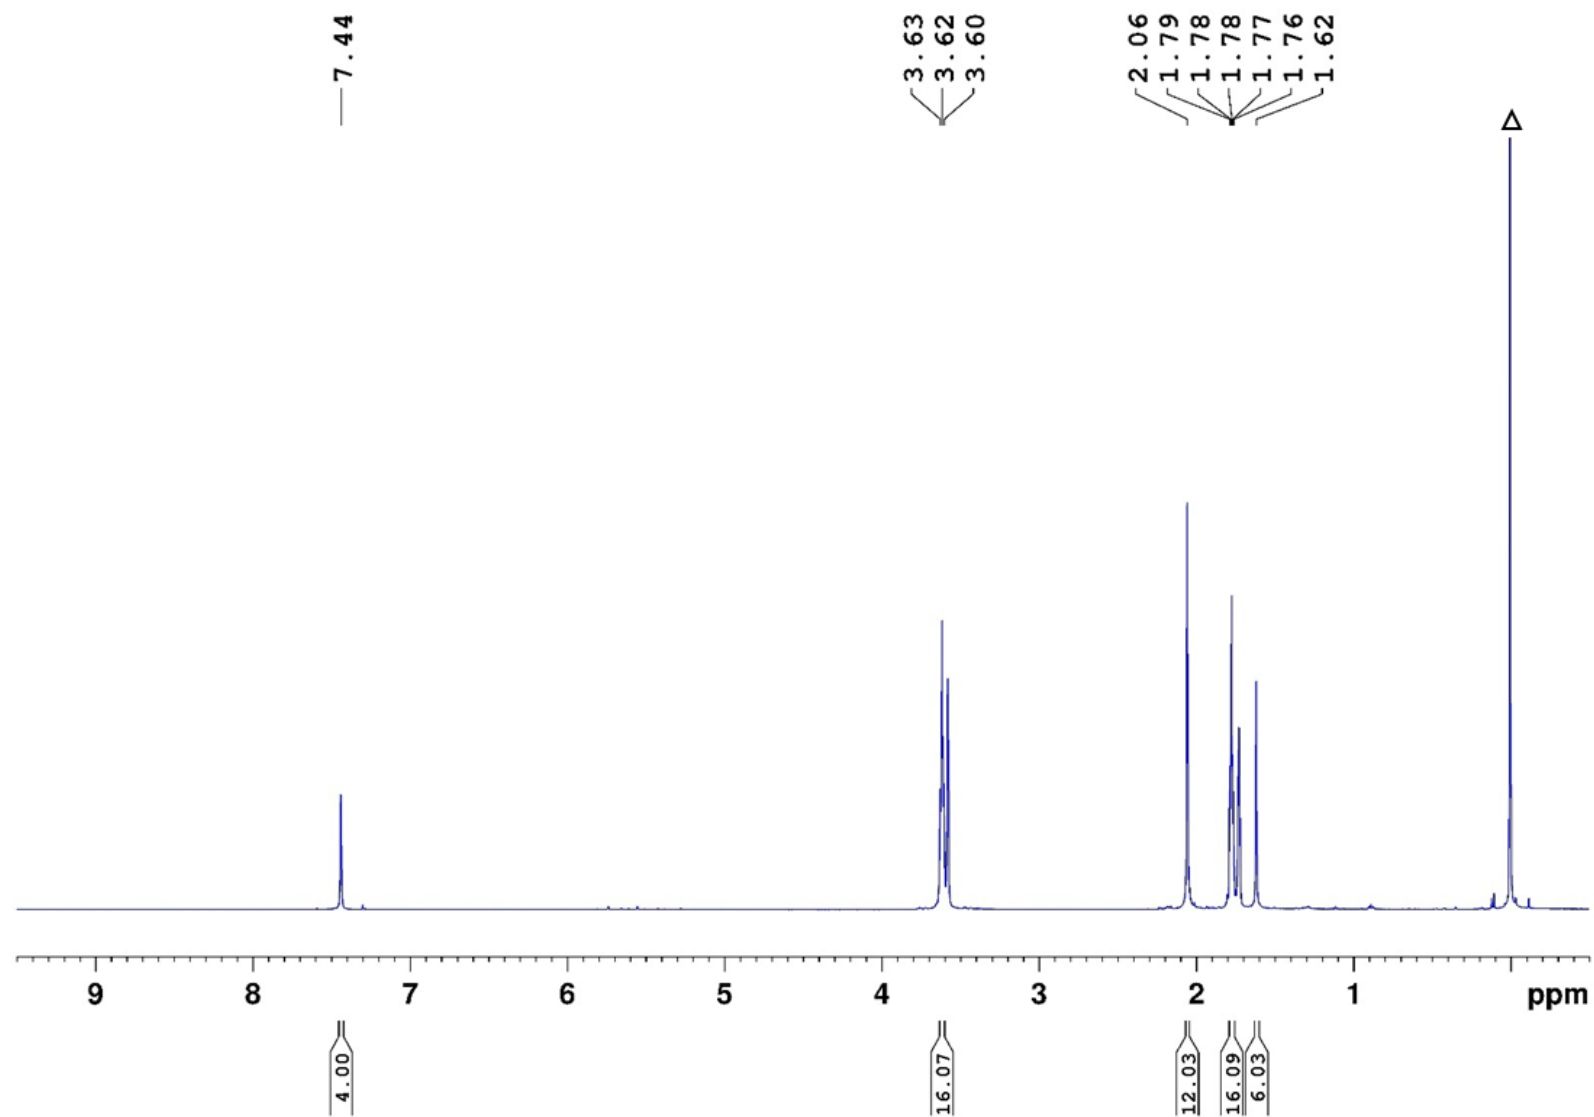

**Figure S37.**  $^1\text{H}$  NMR spectrum of **3-Cr<sub>2</sub>** in  $d_8$ -THF. The resonance marked  $\Delta$  belongs to the internal standard TMS.

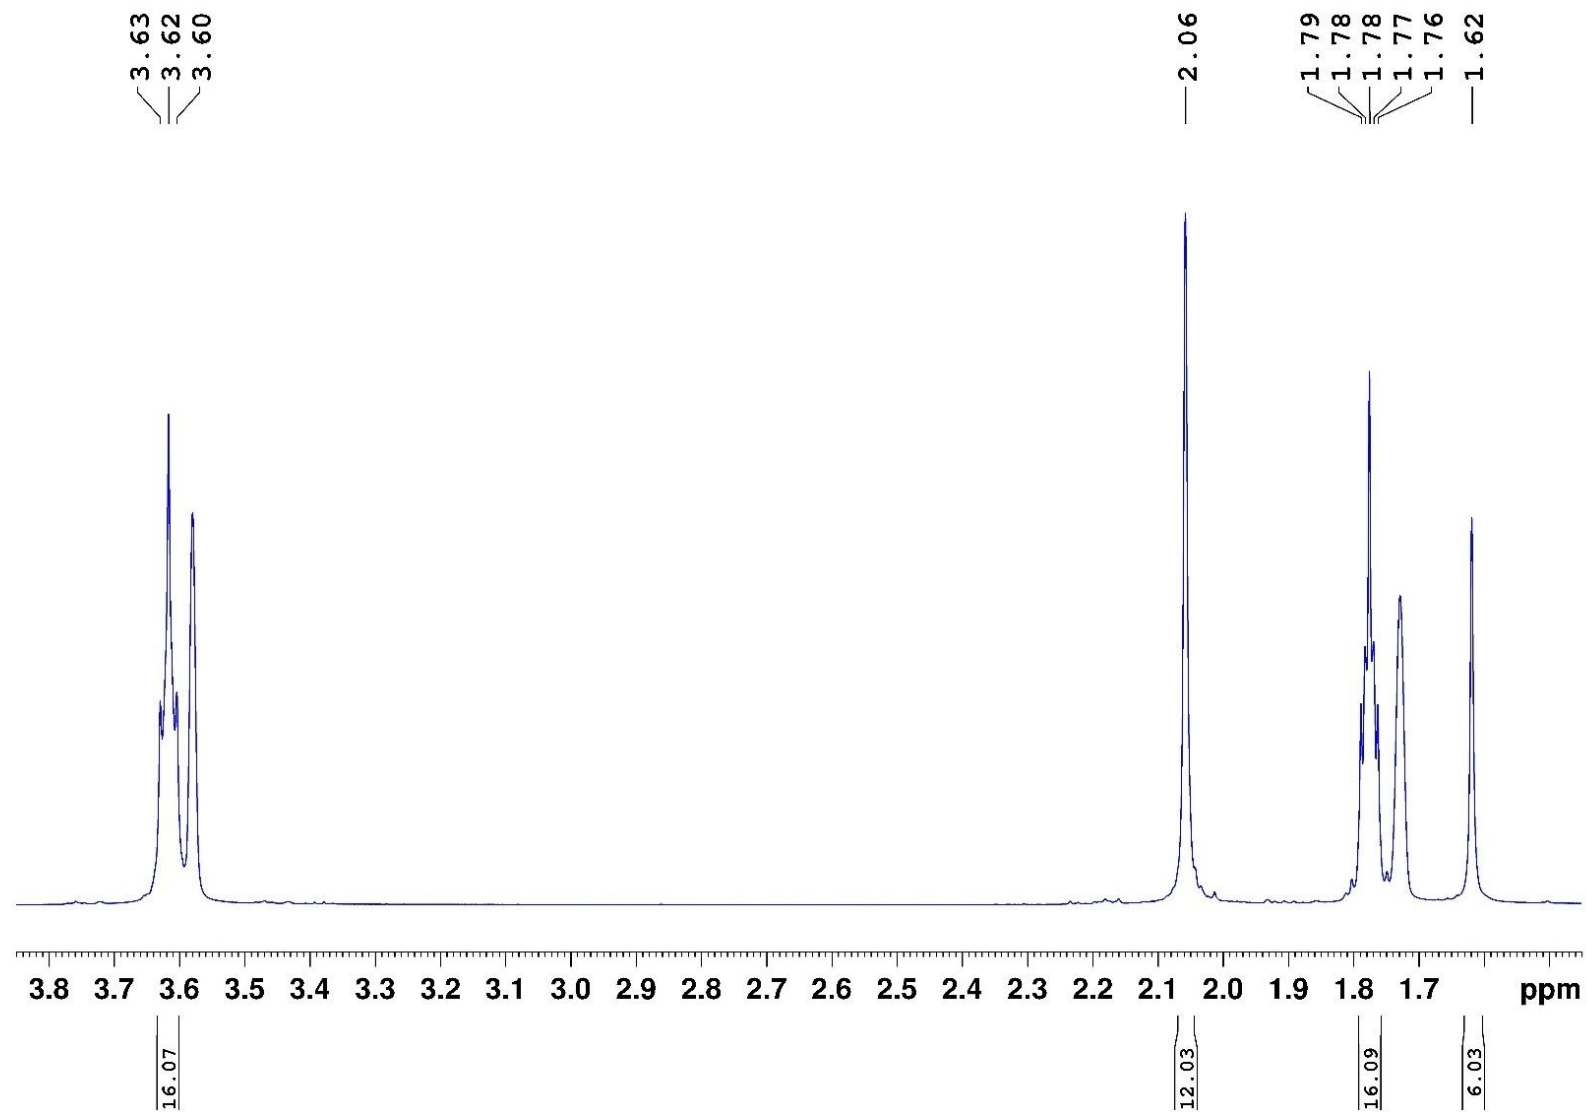

**Figure S38.** Aliphatic region of the  $^1\text{H}$  NMR spectrum of **3-Cr<sub>2</sub>** in  $d_8$ -THF.

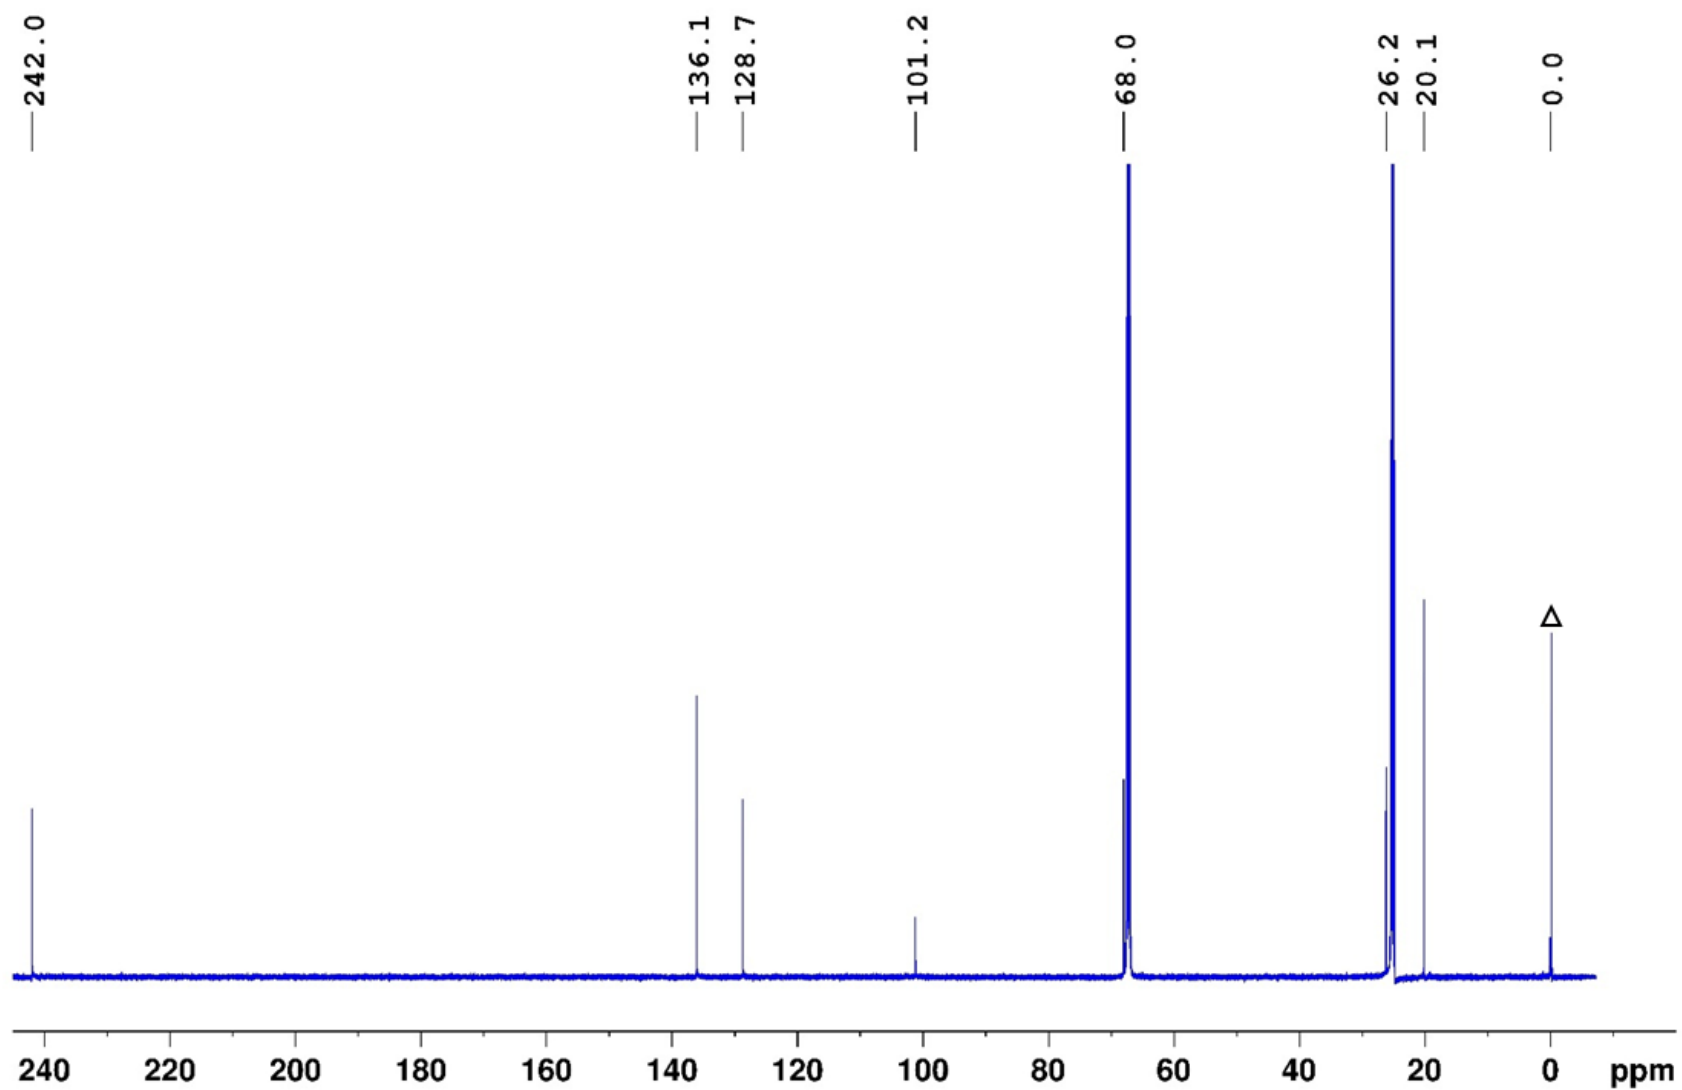

**Figure S39.**  $^{13}\text{C}\{^1\text{H}, ^{11}\text{B}\}$  NMR spectrum of **3-Cr<sub>2</sub>** in  $d_8$ -THF. The resonance marked  $\Delta$  belongs to the internal standard TMS.

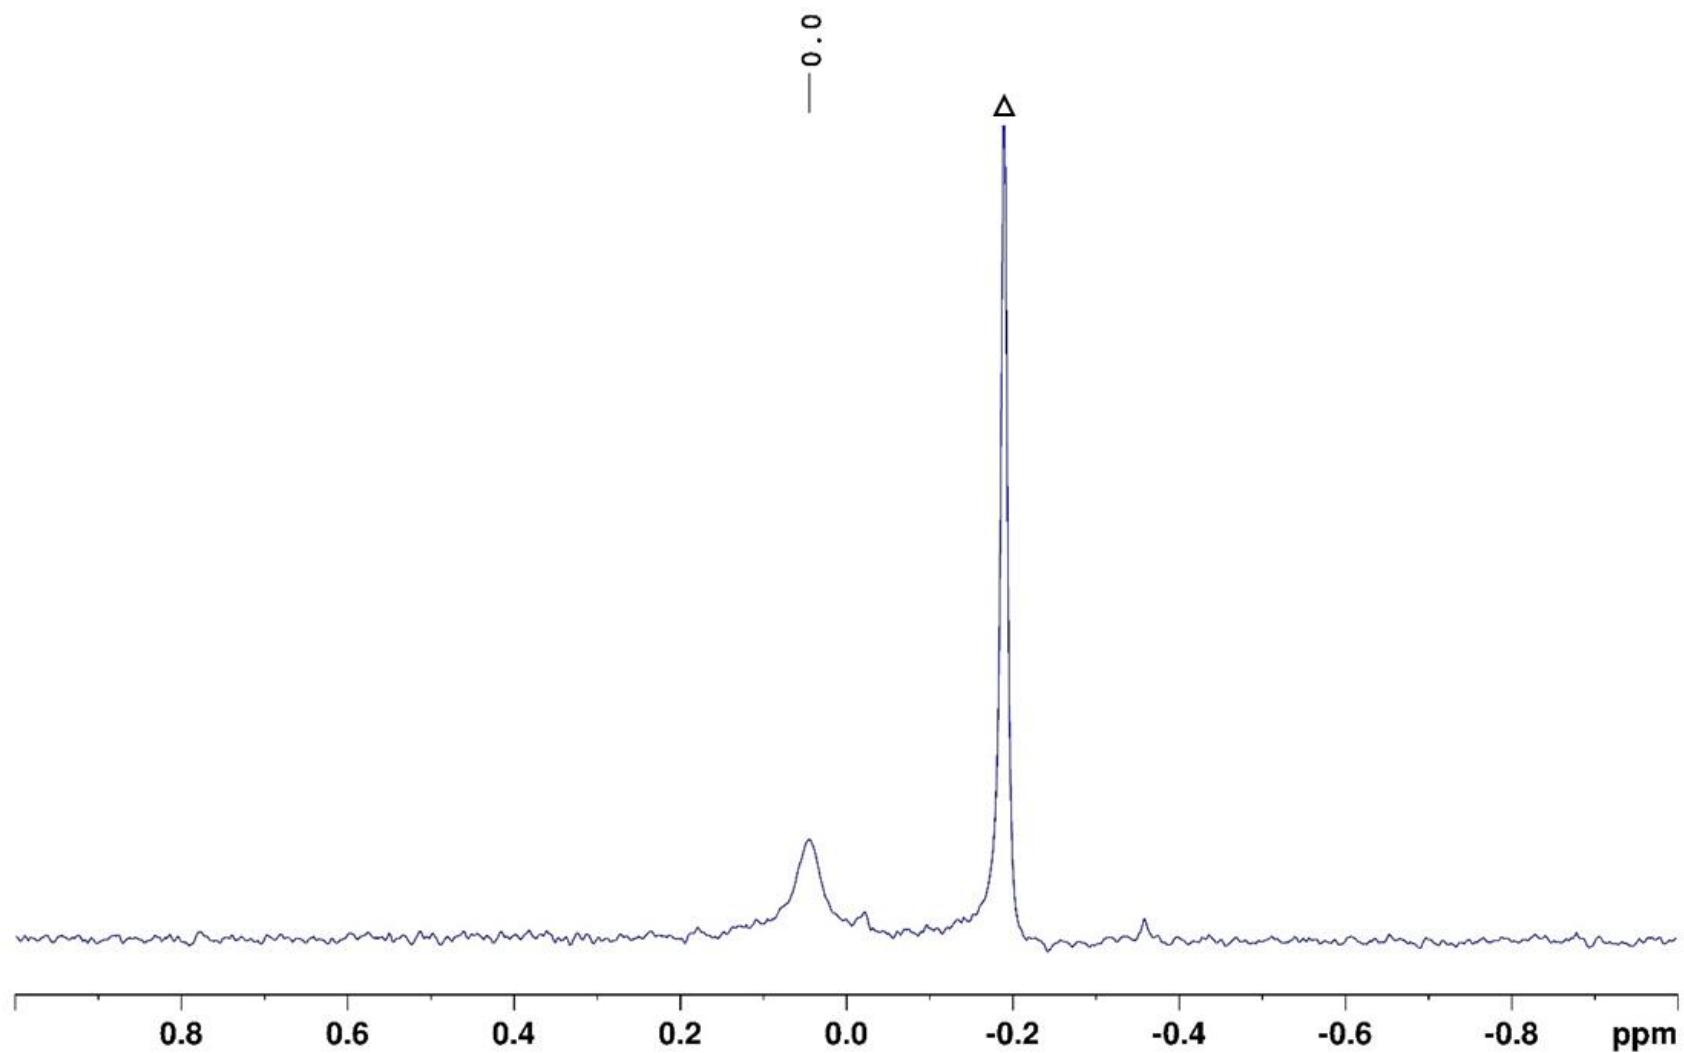

**Figure S40.** Part of the aliphatic region of the  $^{13}\text{C}\{^1\text{H}, ^{11}\text{B}\}$  NMR spectrum of **3-Cr<sub>2</sub>** in  $d_8$ -THF. The resonance marked  $\Delta$  belongs to the internal standard TMS.

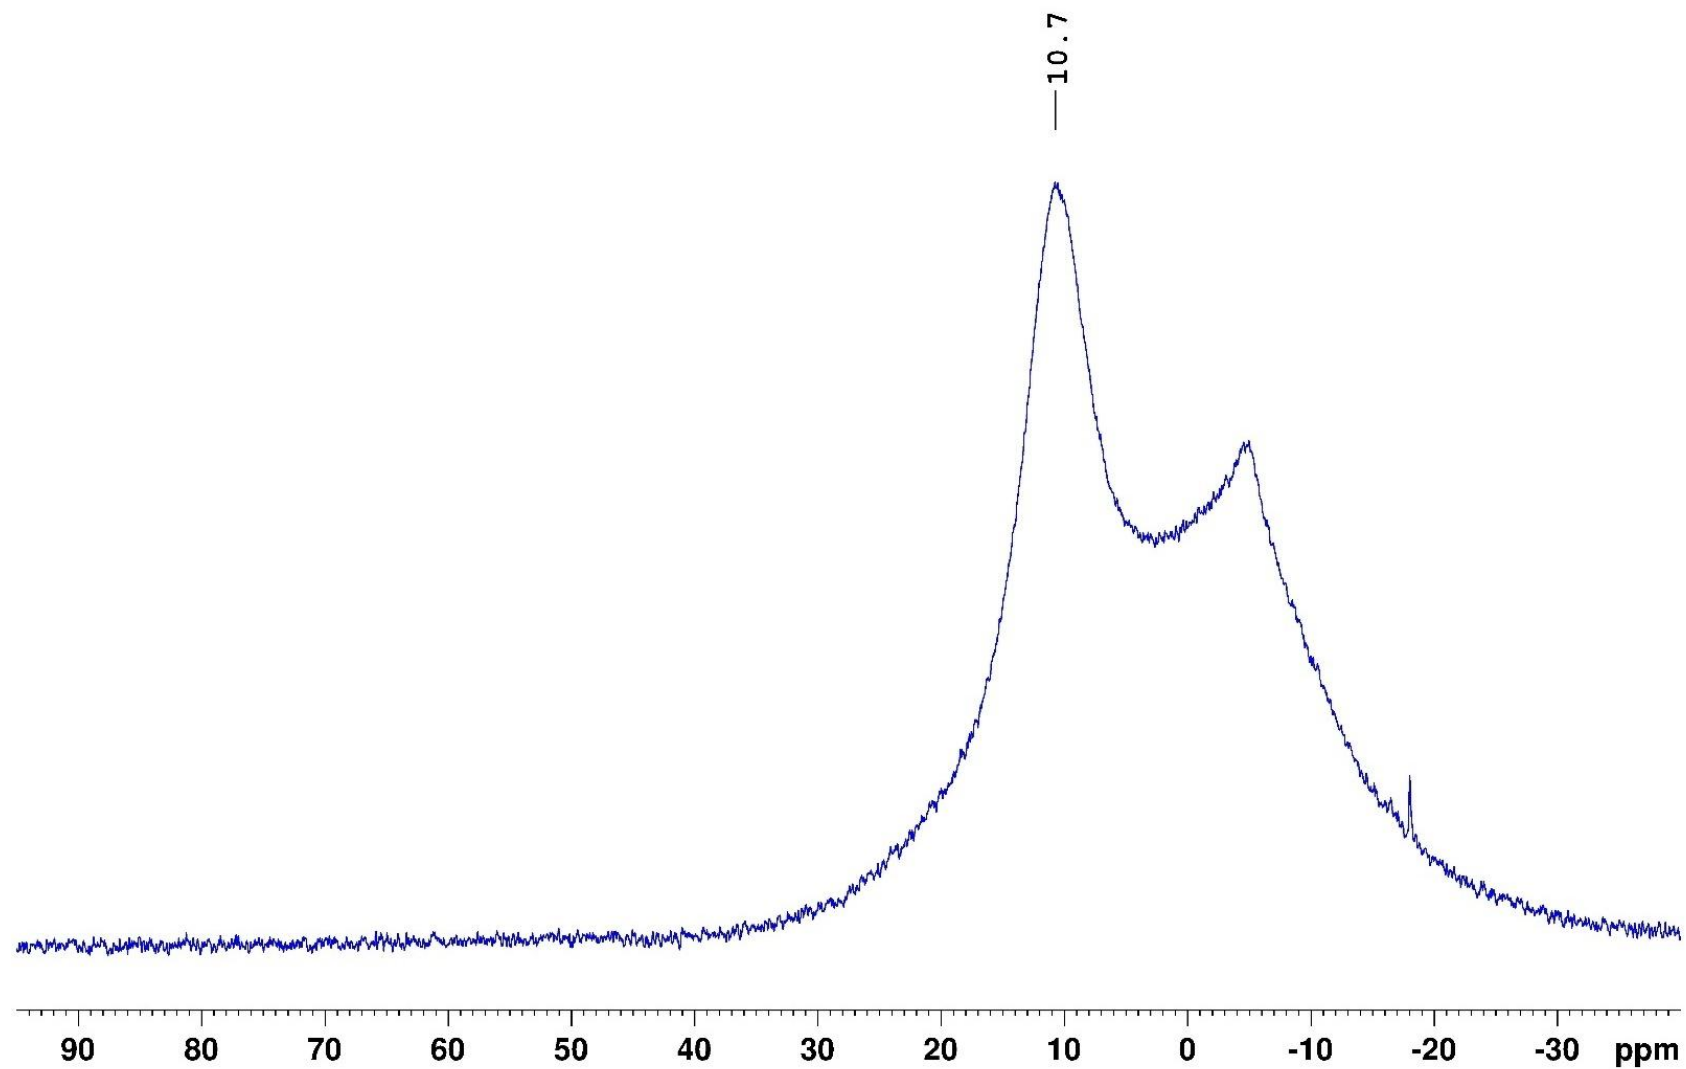

**Figure S41.**  $^{11}\text{B}\{^1\text{H}\}$  NMR spectrum of  $3\text{-Cr}_2$  in  $d_8\text{-THF}$ .

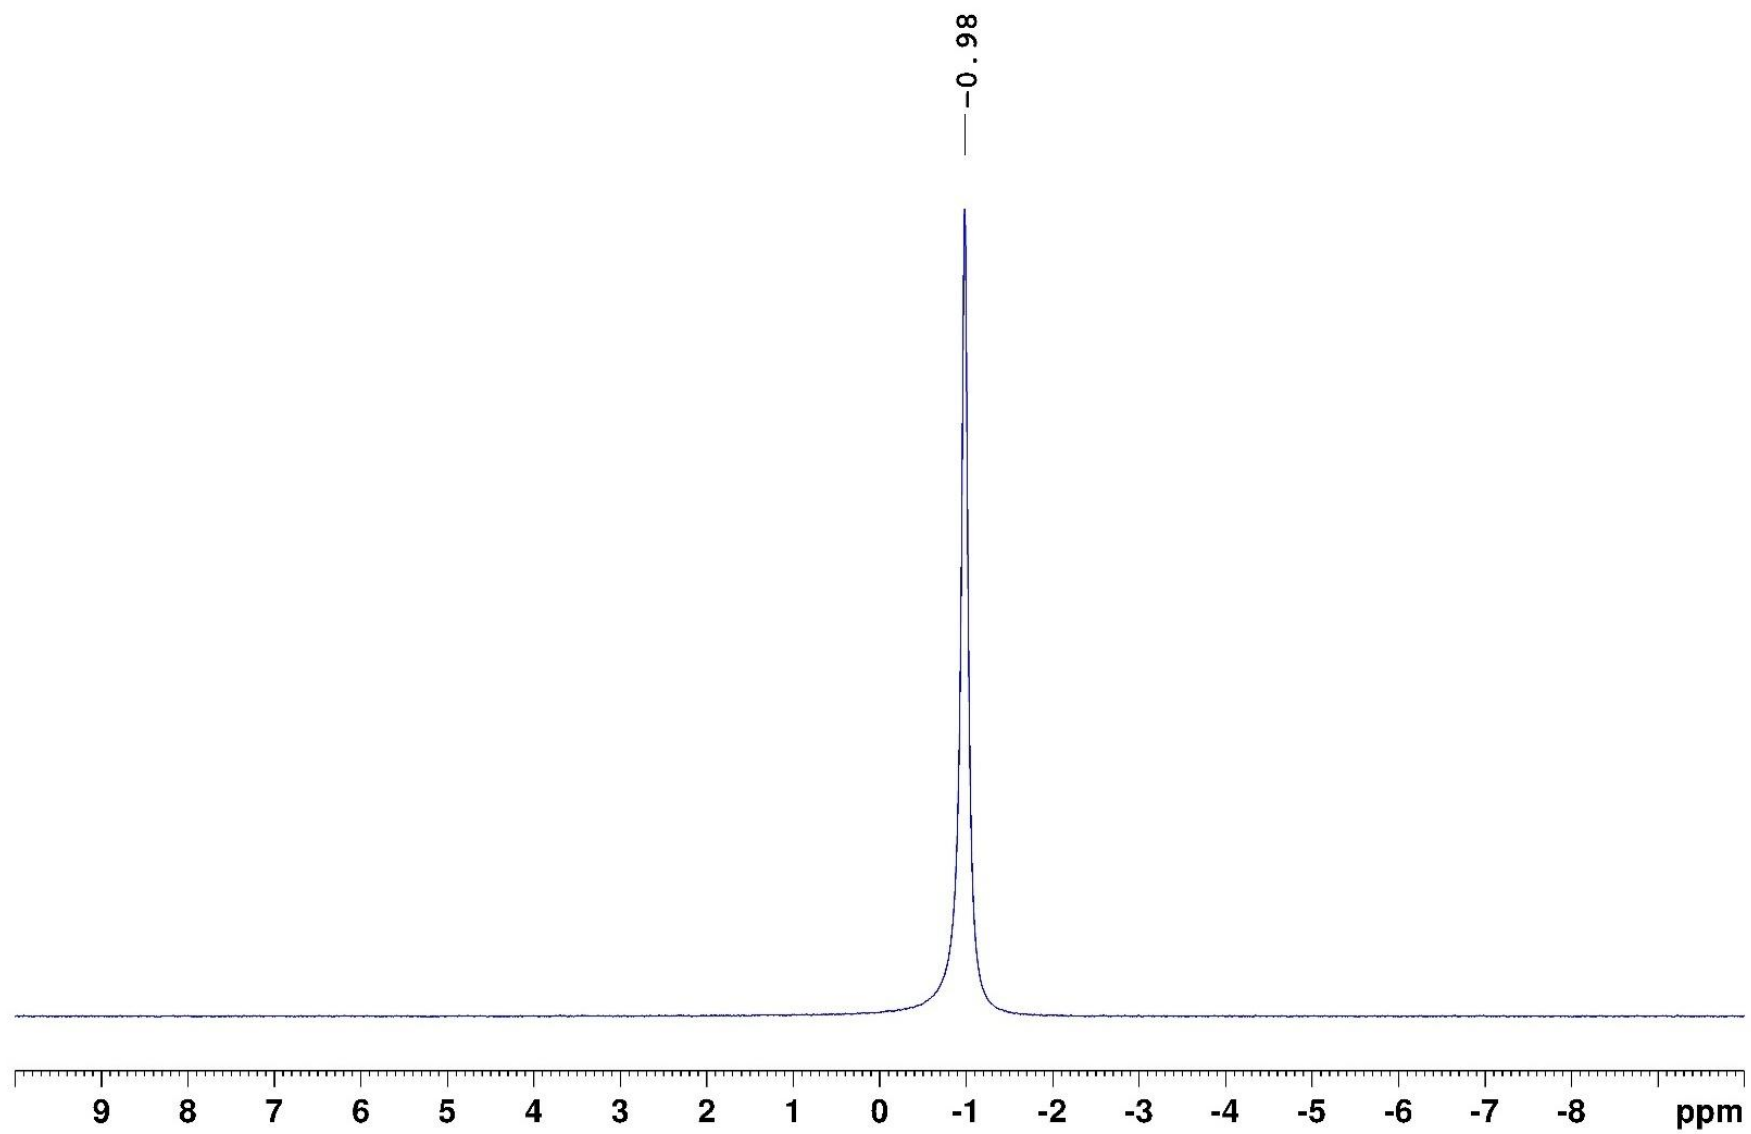

**Figure S42.**  ${}^7\text{Li}\{{}^1\text{H}\}$  NMR spectrum of **3-Cr<sub>2</sub>** in  $d_8$ -THF.

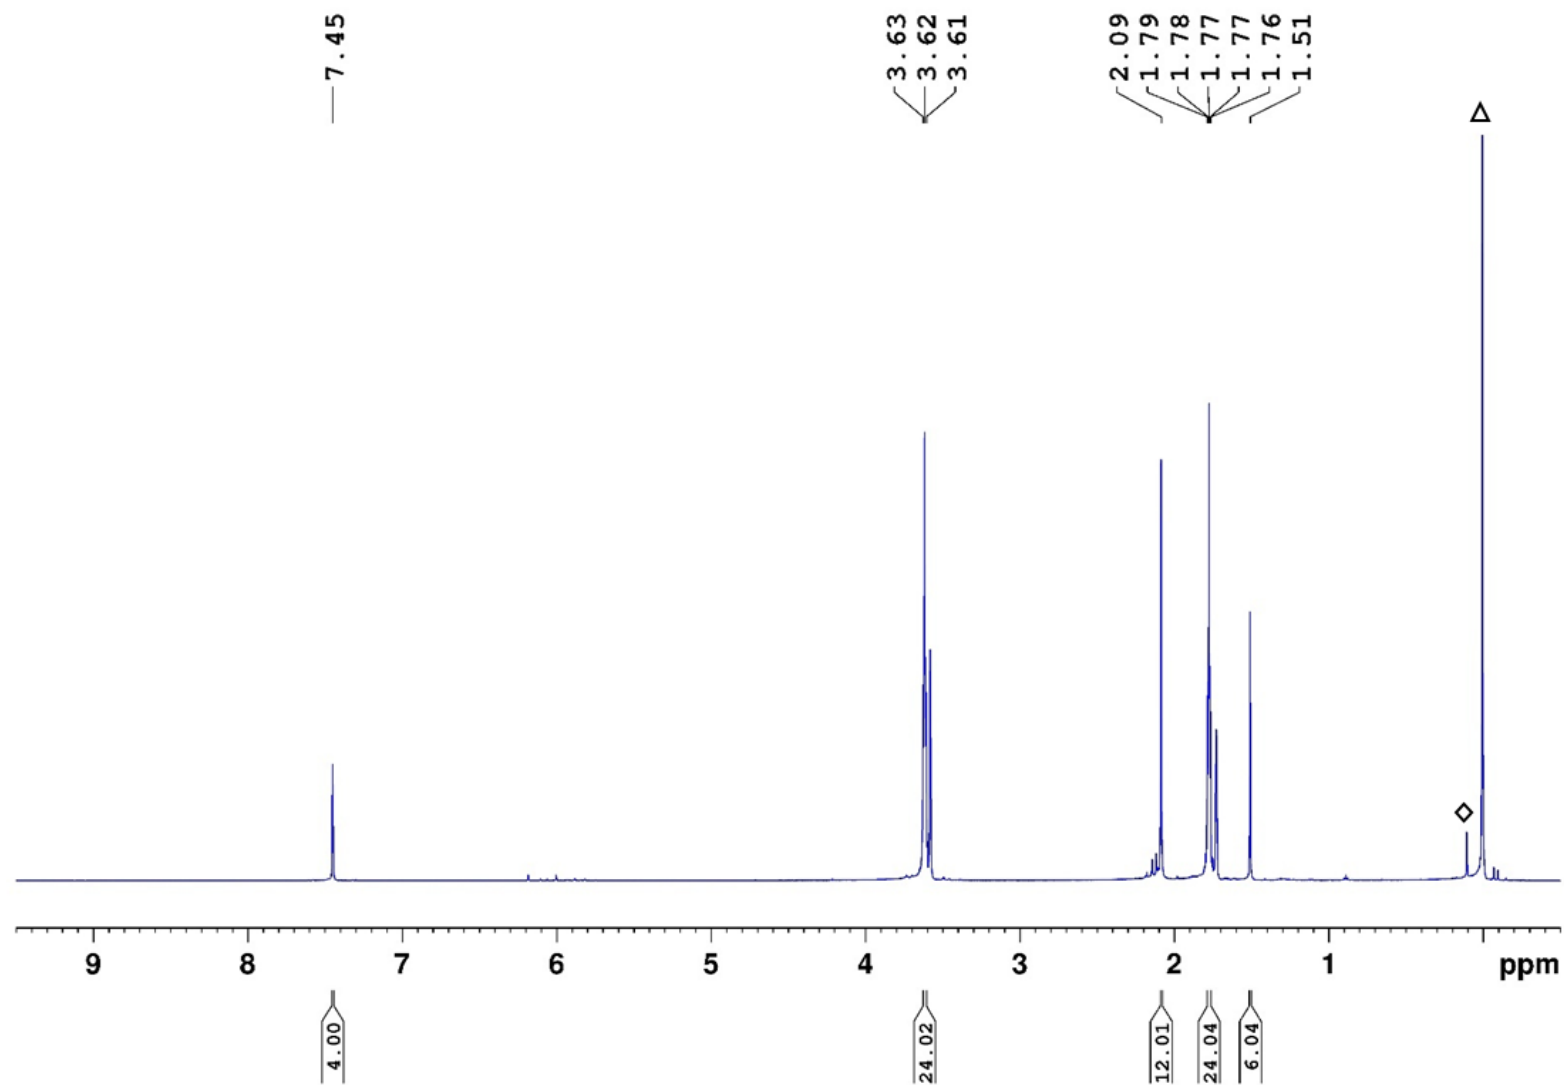

**Figure S43.**  $^1\text{H}$  NMR spectrum of **3-Mo<sub>2</sub>** in  $d_8$ -THF. The resonance marked  $\diamond$  belongs to silicon grease, and that marked  $\Delta$  to the internal standard TMS.

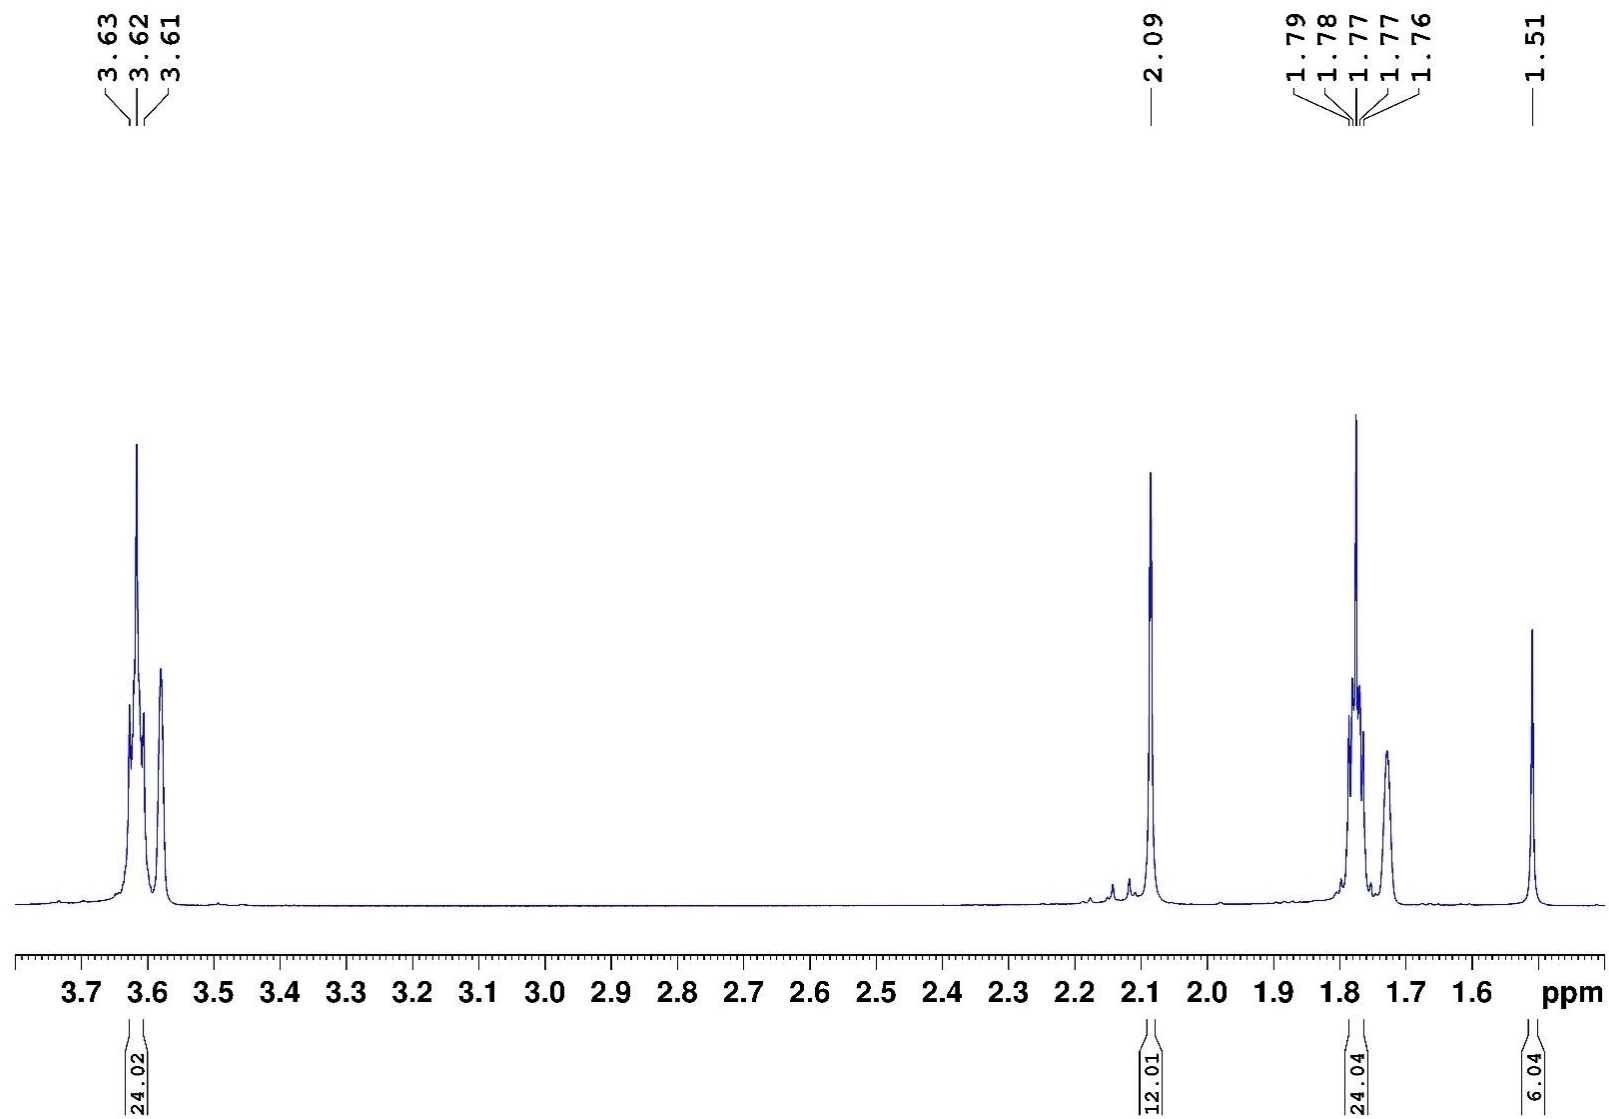

**Figure S44.** Part of the aliphatic region of the  $^1\text{H}$  NMR spectrum of **3-Mo<sub>2</sub>** in  $d_8$ -THF.

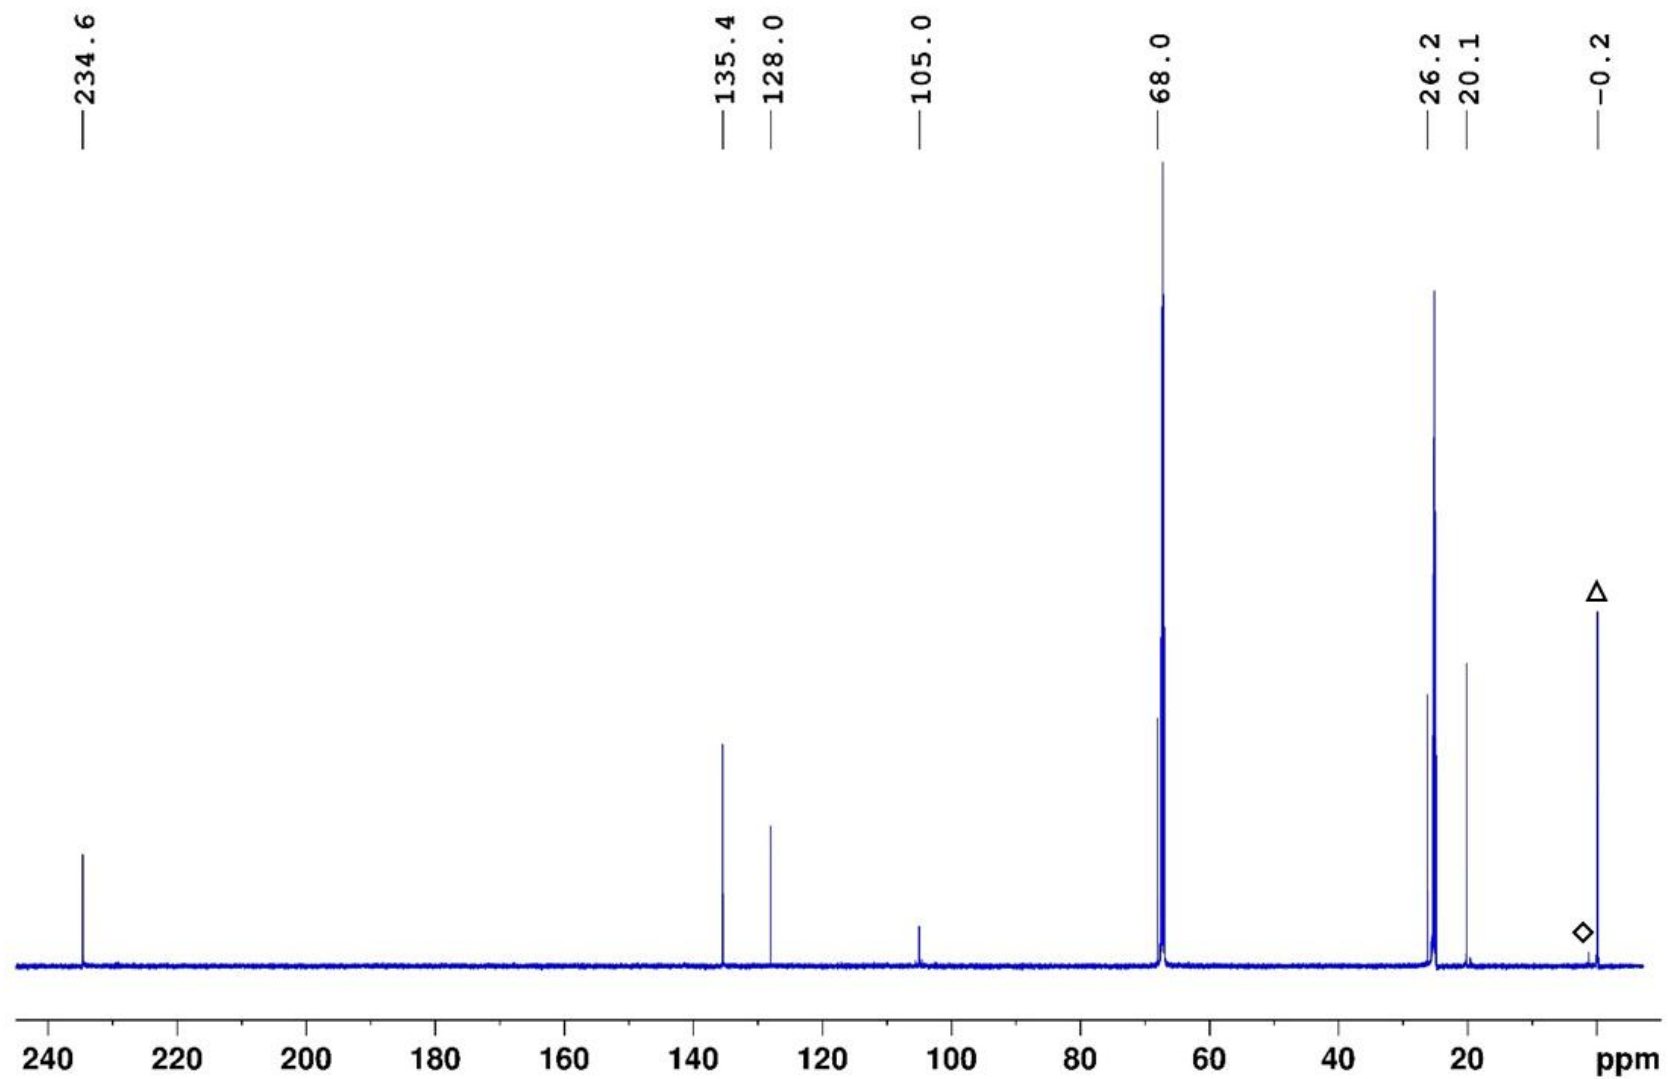

**Figure S45.**  $^{13}\text{C}\{^1\text{H}\}$  NMR spectrum of 3-Mo<sub>2</sub> in d<sub>8</sub>-THF. The resonance marked ◇ belongs to silicon grease, and that marked Δ to the internal standard TMS.

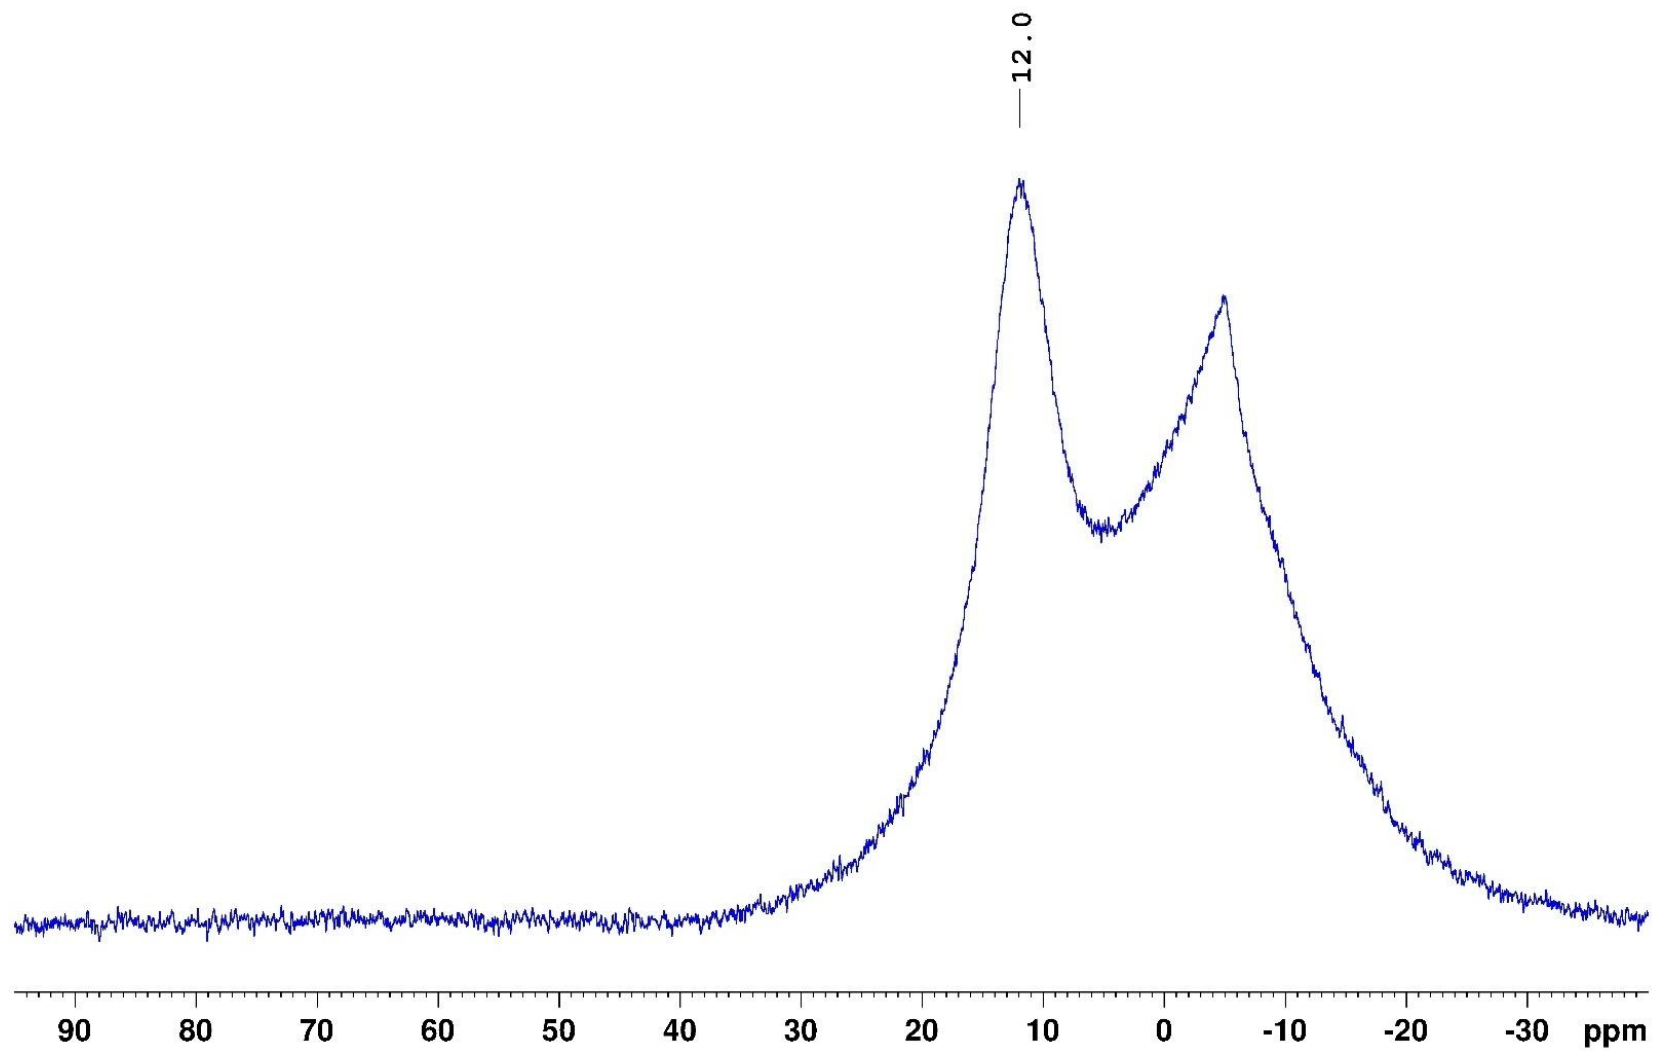

**Figure S46.**  $^{11}\text{B}\{^1\text{H}\}$  NMR spectrum of **3-Mo<sub>2</sub>** in  $d_8$ -THF.

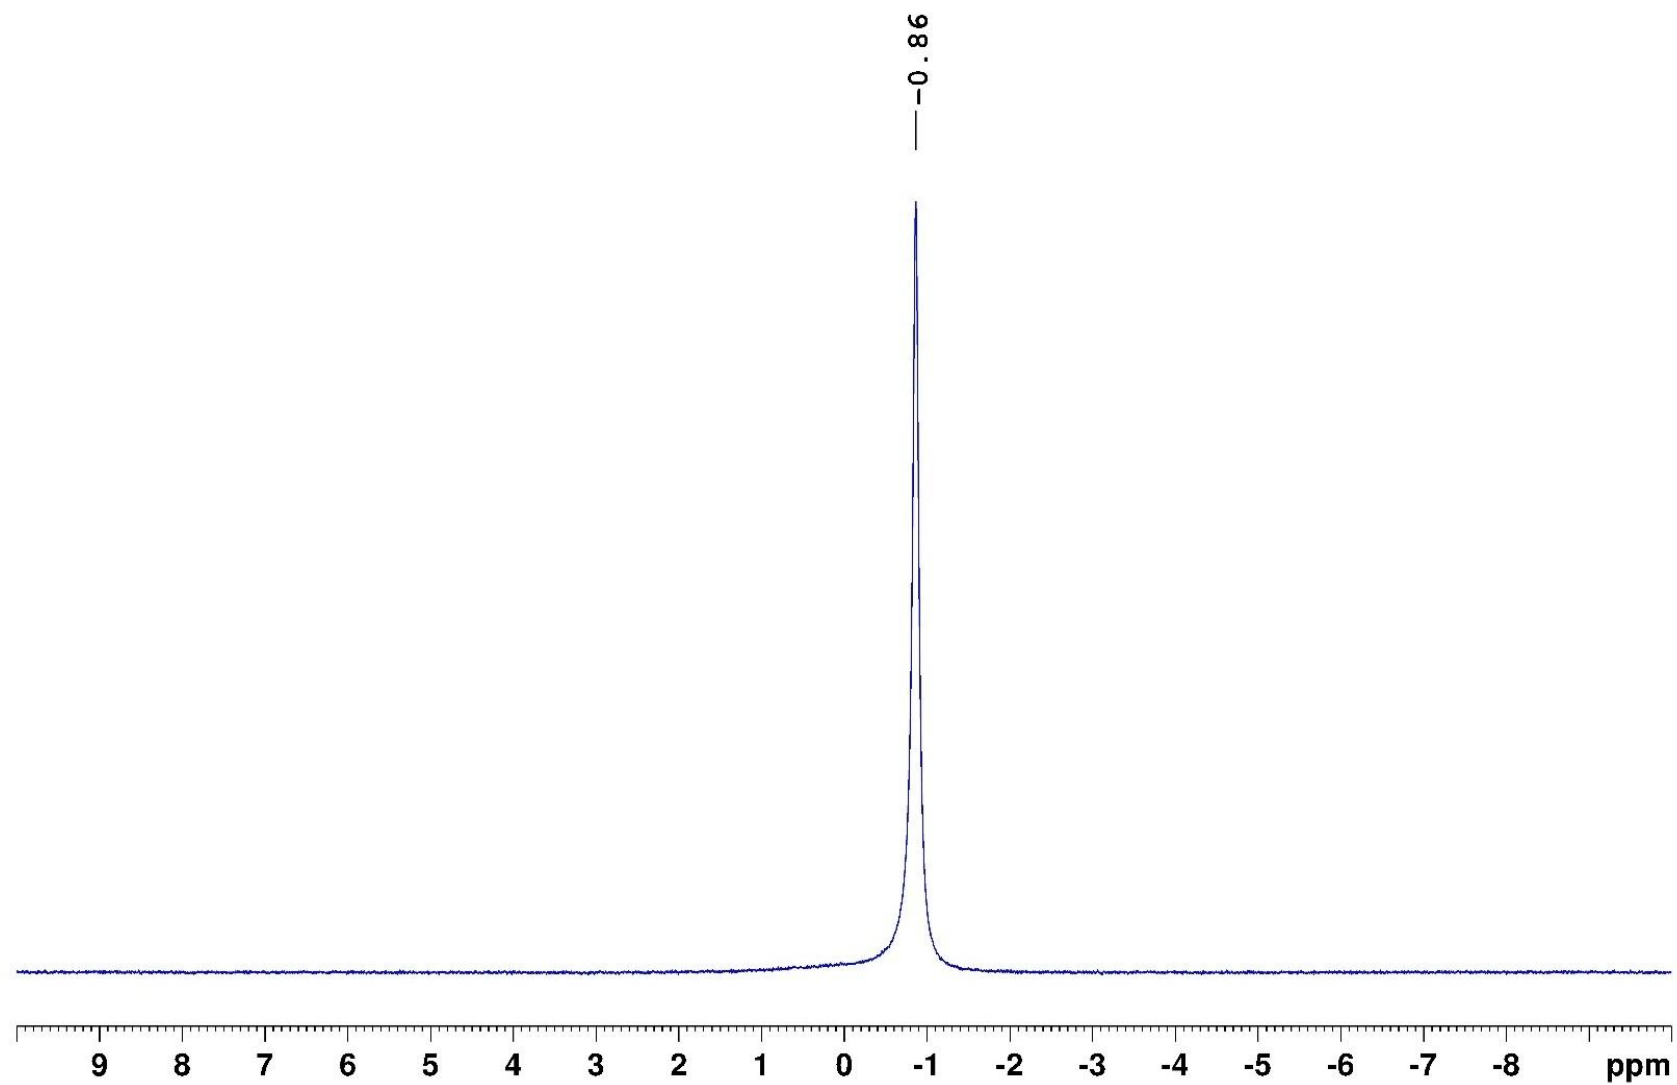

Figure S47.  ${}^7\text{Li}\{{}^1\text{H}\}$  NMR spectrum of **3-Mo2** in  $d_8$ -THF.

## IR spectra

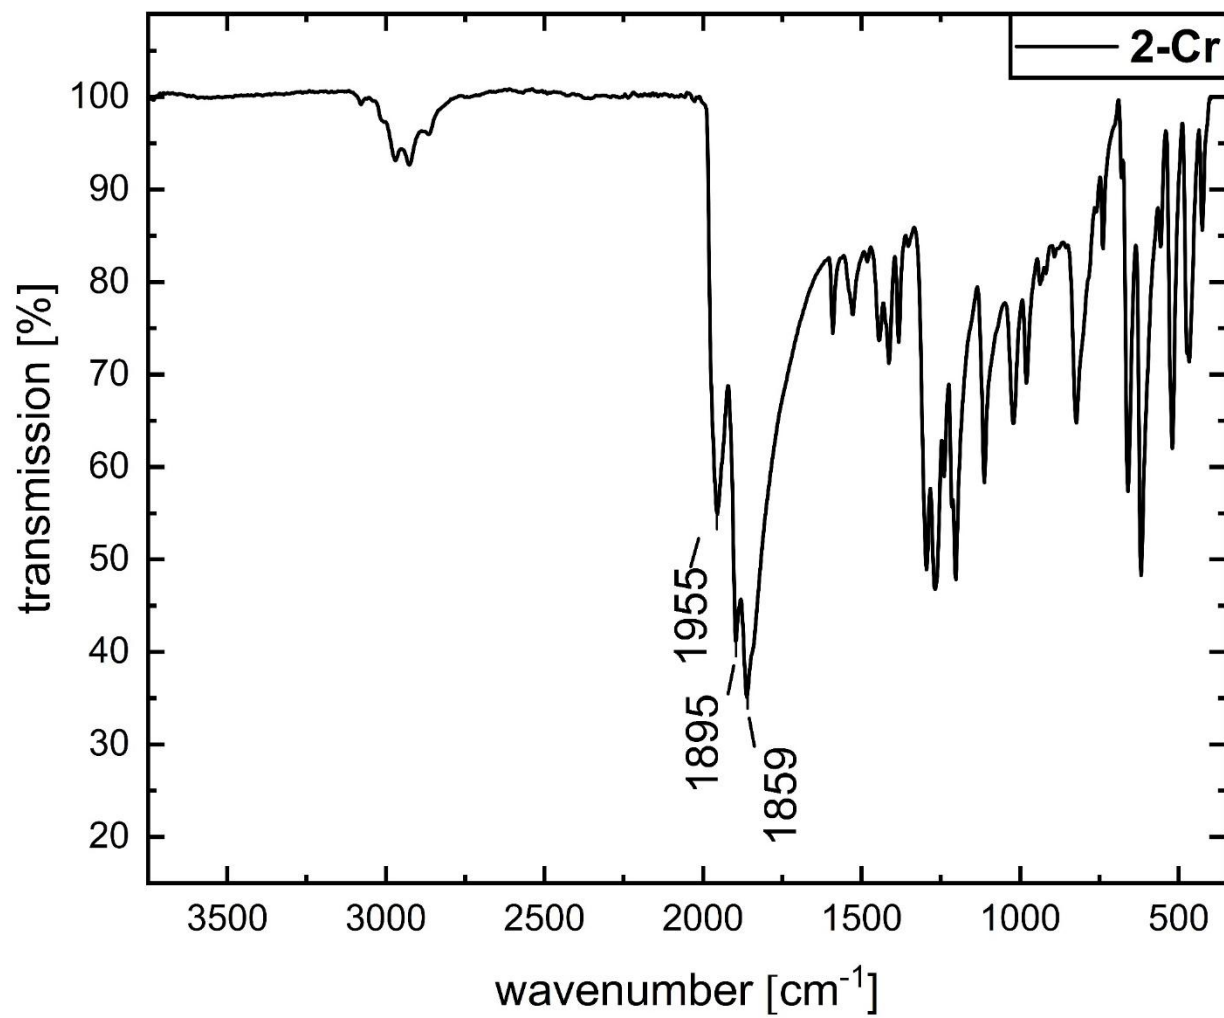

**Figure S48.** Solid-state IR spectrum of 2-Cr.

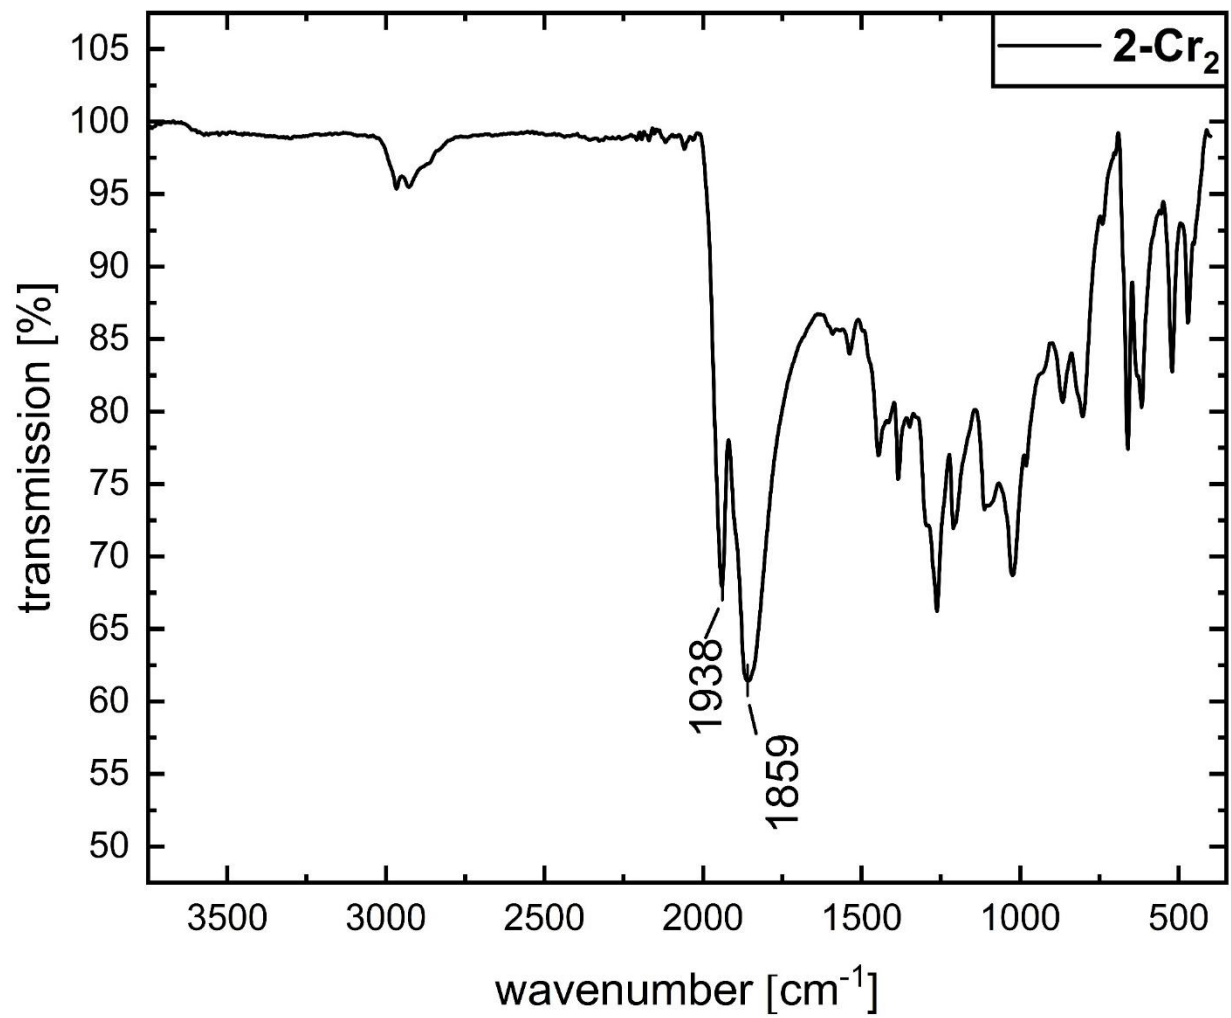

**Figure S49.** Solid-state IR spectrum of 2-Cr<sub>2</sub>.

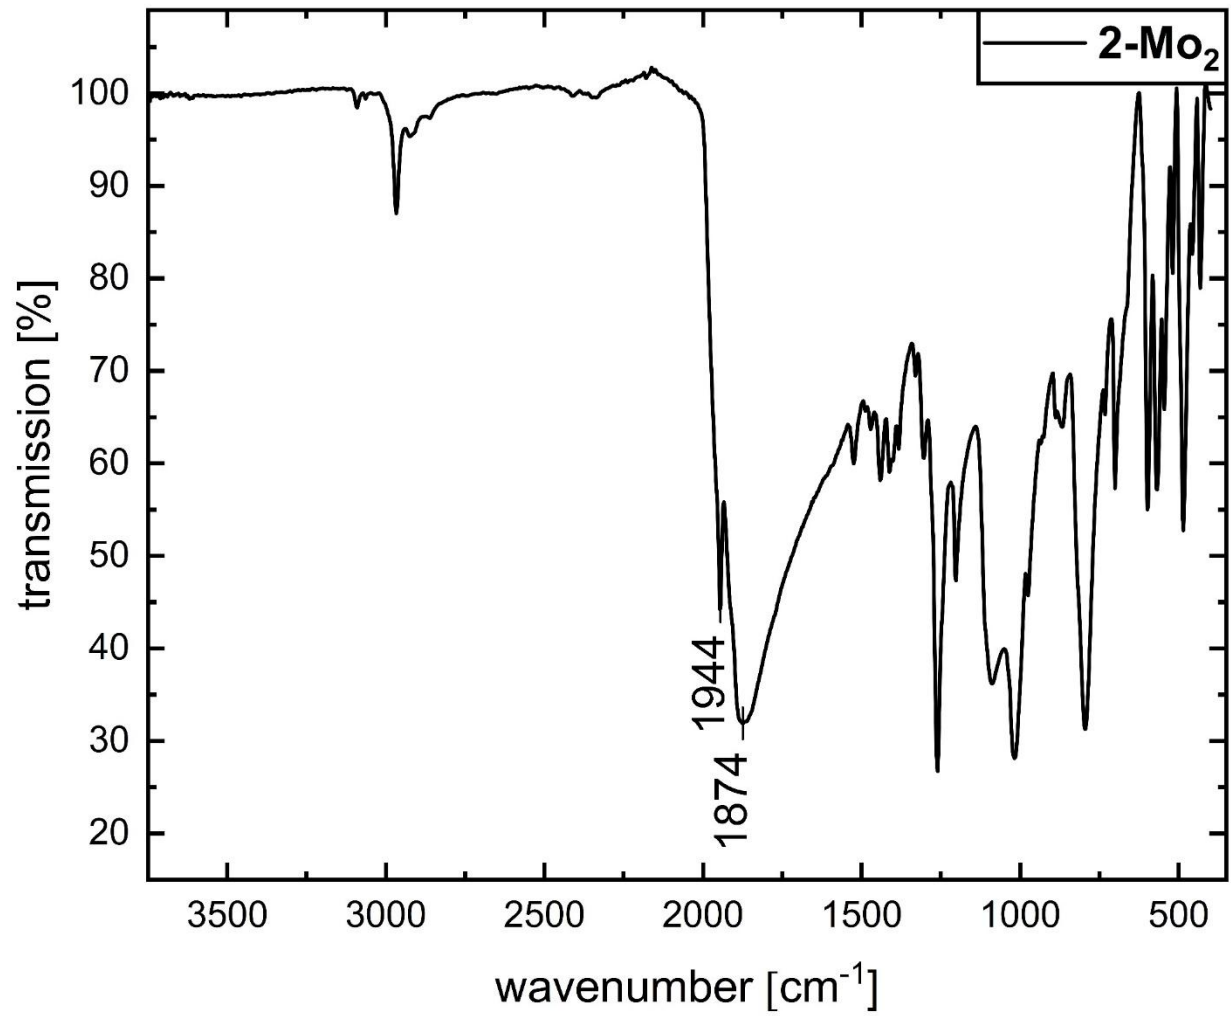

**Figure S50.** Solid-state IR spectrum of 2-Mo<sub>2</sub>.

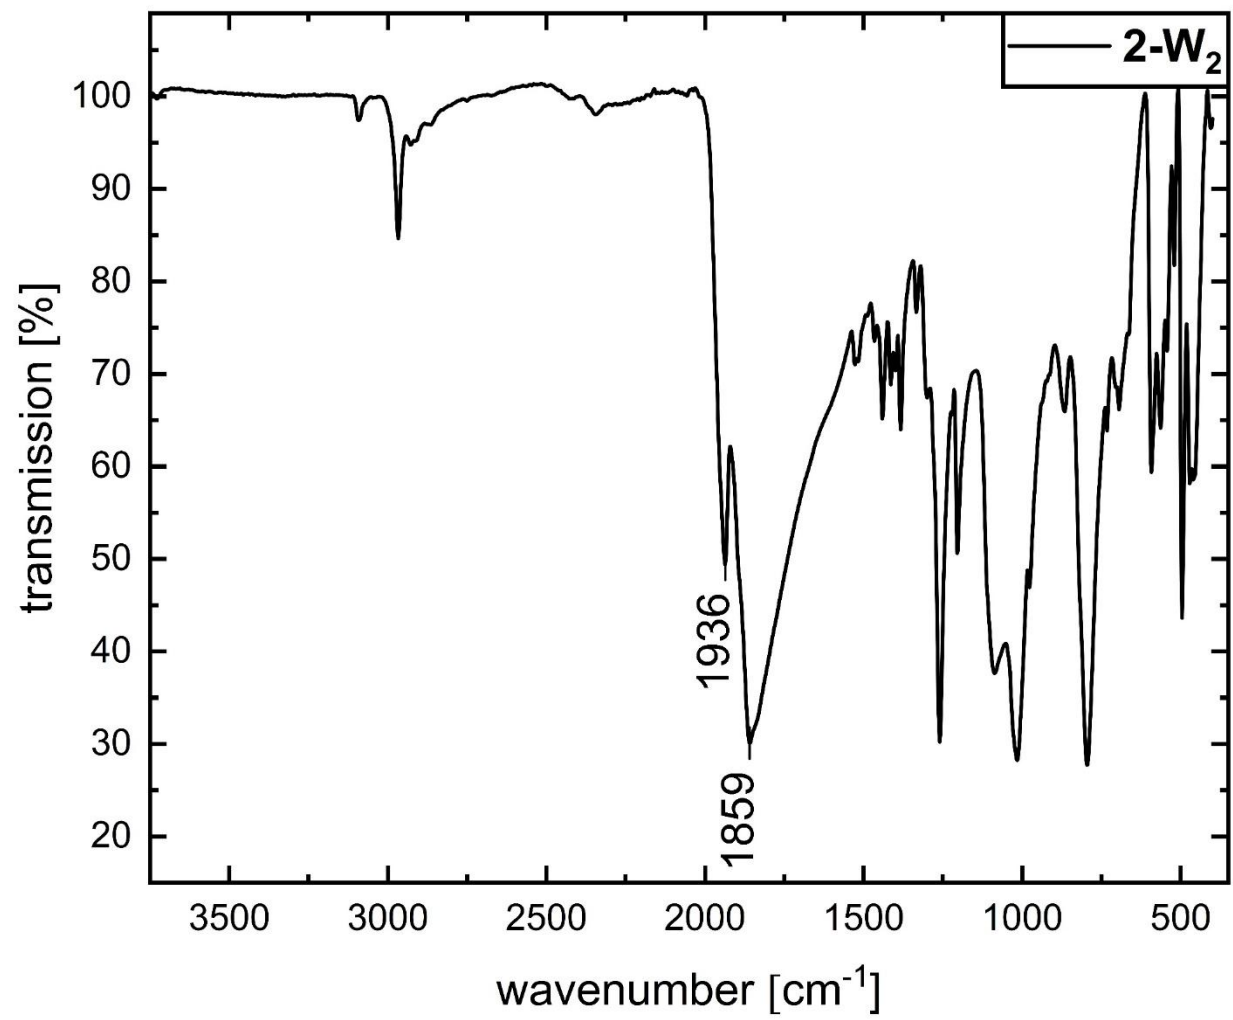

**Figure S51.** Solid-state IR spectrum of 2-W<sub>2</sub>.

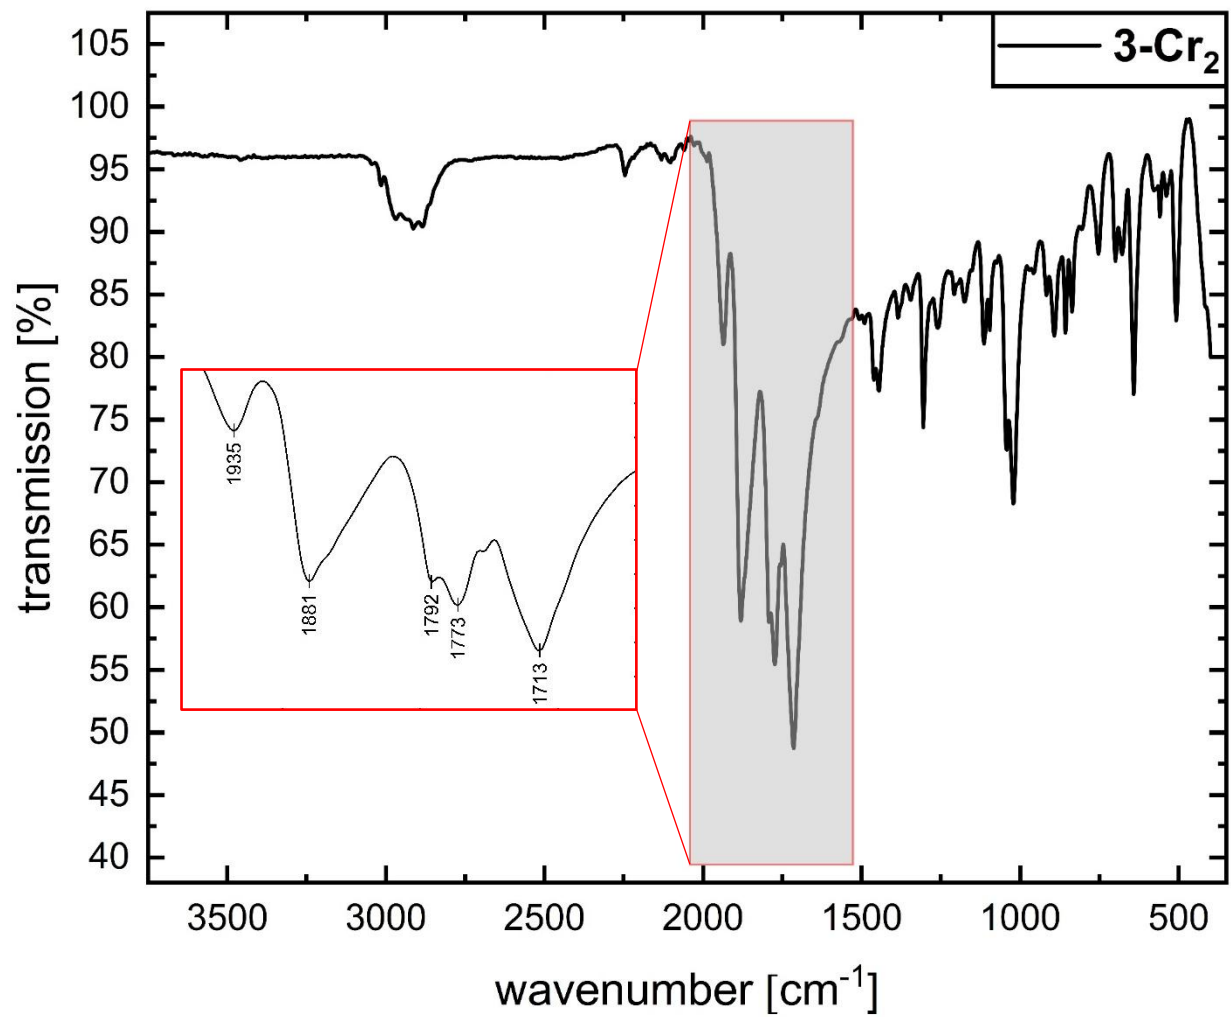

**Figure S52.** Full solid-state IR spectrum and zoomed-in C=O stretching region (insert) of 3-Cr<sub>2</sub>.

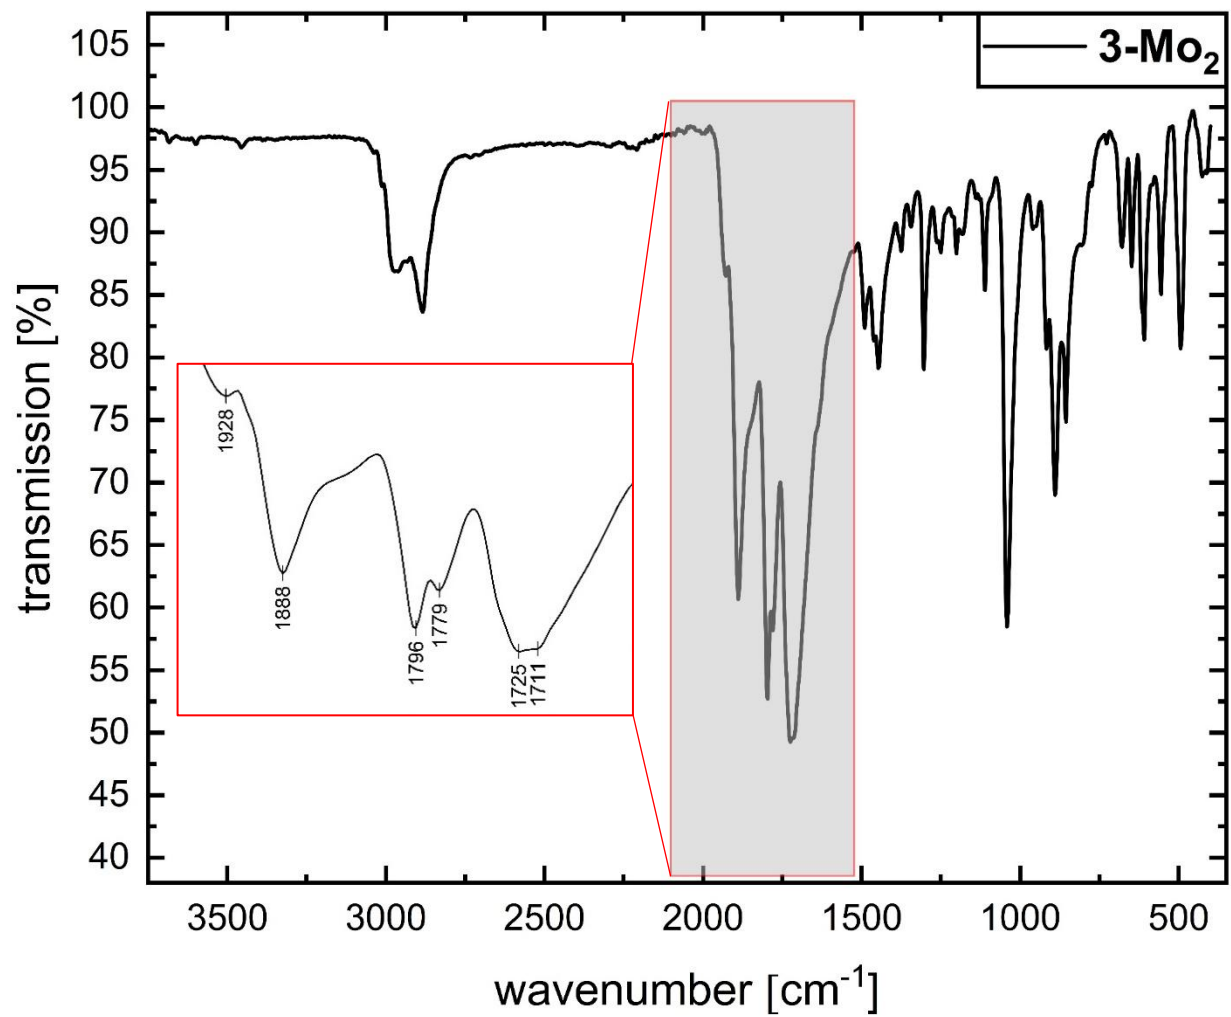

**Figure S53.** Full solid-state IR spectrum and zoomed-in C=O stretching region (insert) of **3-Mo<sub>2</sub>**.

## UV-vis spectra

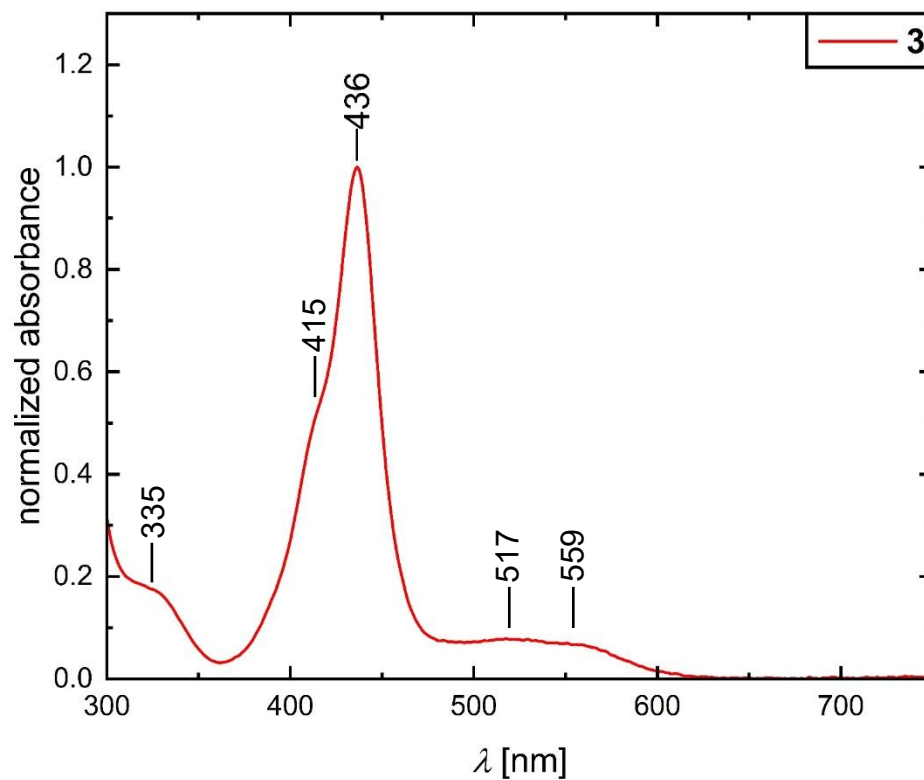

**Figure S54.** UV-vis absorption spectrum of **3** in THF.  $\lambda_{\max} = 436$ ,  $\lambda_2 = 335$ ,  $\lambda_3 = 415$  (shoulder),  $\lambda_4 = 517$  (broad),  $\lambda_4 = 559$  (broad) nm.

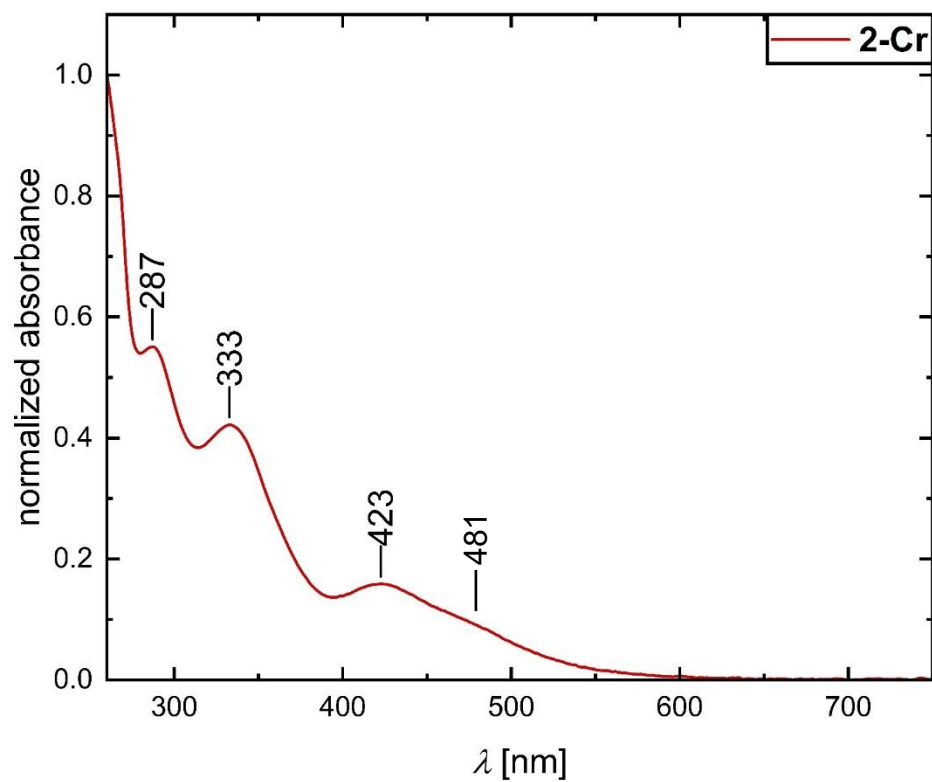

**Figure S55.** UV-vis absorption spectrum of **2-Cr** in THF.  $\lambda_{\text{max}} = 287$ ,  $\lambda_2 = 333$ ,  $\lambda_3 = 423$ ,  $\lambda_4 = 481$  (broad shoulder) nm.

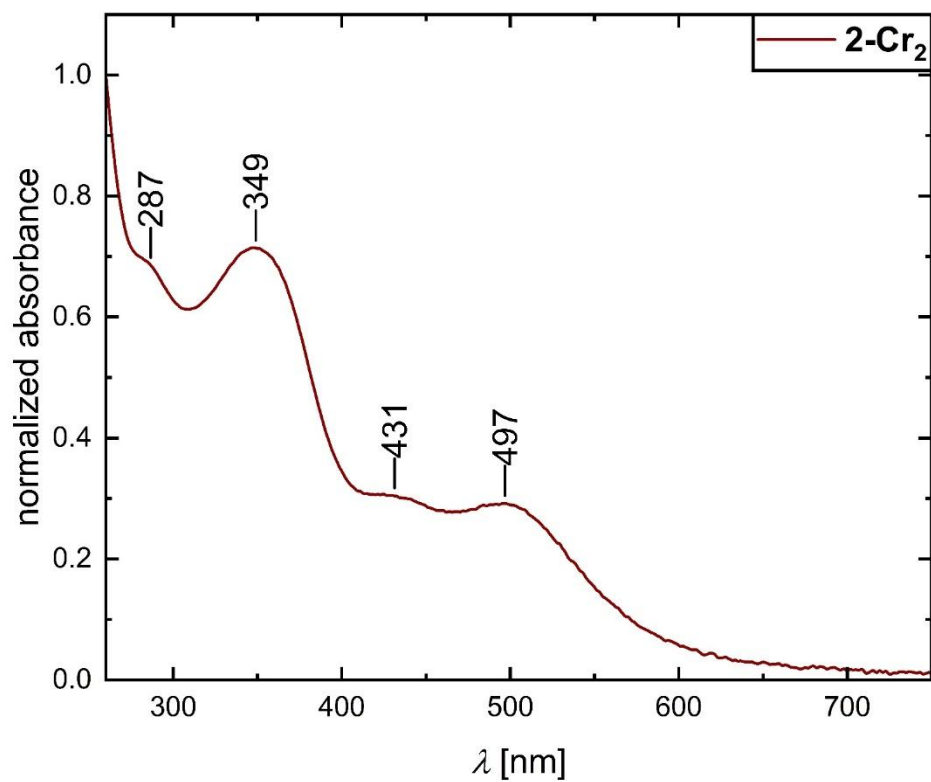

**Figure S56.** UV-vis absorption spectrum of **2-Cr<sub>2</sub>** in THF.  $\lambda_{\text{max}} = 349$  (broad),  $\lambda_2 = 287$  (shoulder),  $\lambda_3 = 431$  (broad),  $\lambda_4 = 497$  (very broad) nm.

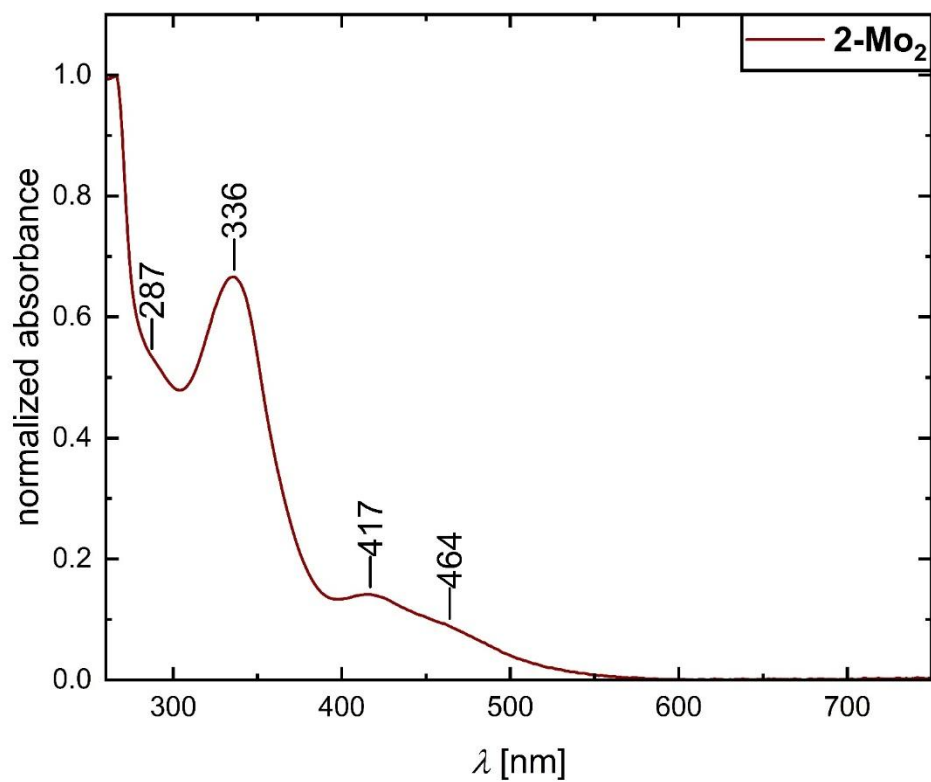

**Figure S57.** UV-vis absorption spectrum of **2-Mo<sub>2</sub>** in THF.  $\lambda_{\text{max}} = 336$ ,  $\lambda_2 = 287$  (shoulder),  $\lambda_3 = 417$ ,  $\lambda_4 = 464$  (broad shoulder) nm.

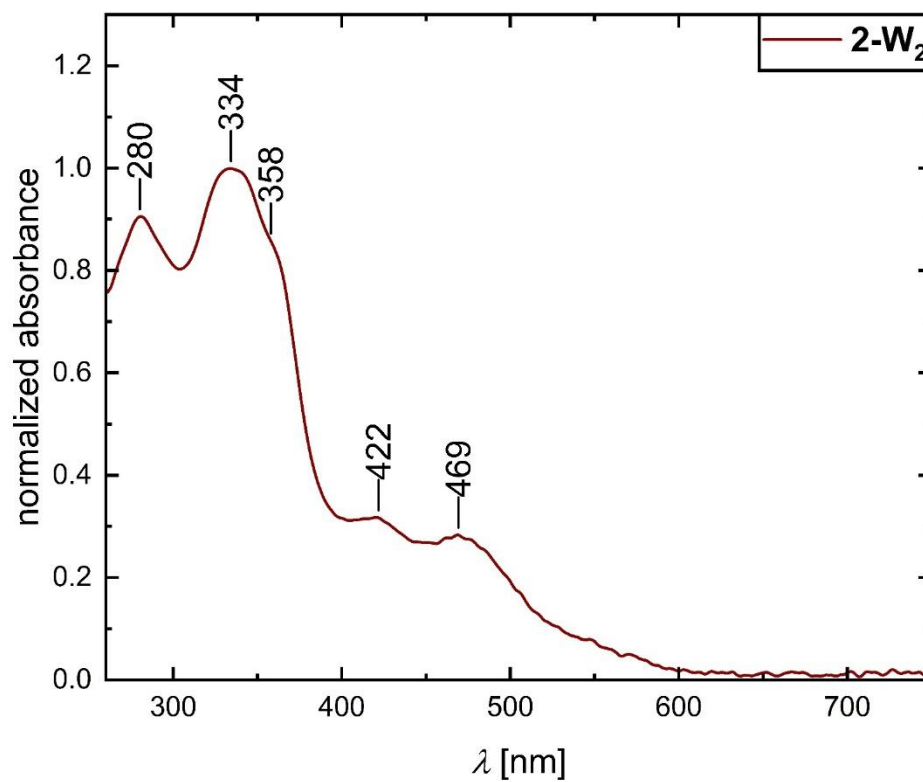

**Figure S58.** UV-vis absorption spectrum of **2-W<sub>2</sub>** in THF.  $\lambda_{\text{max}} = 334$ ,  $\lambda_2 = 280$ ,  $\lambda_3 = 358$  (shoulder),  $\lambda_4 = 422$  (shoulder),  $\lambda_5 = 469$  (very broad) nm.

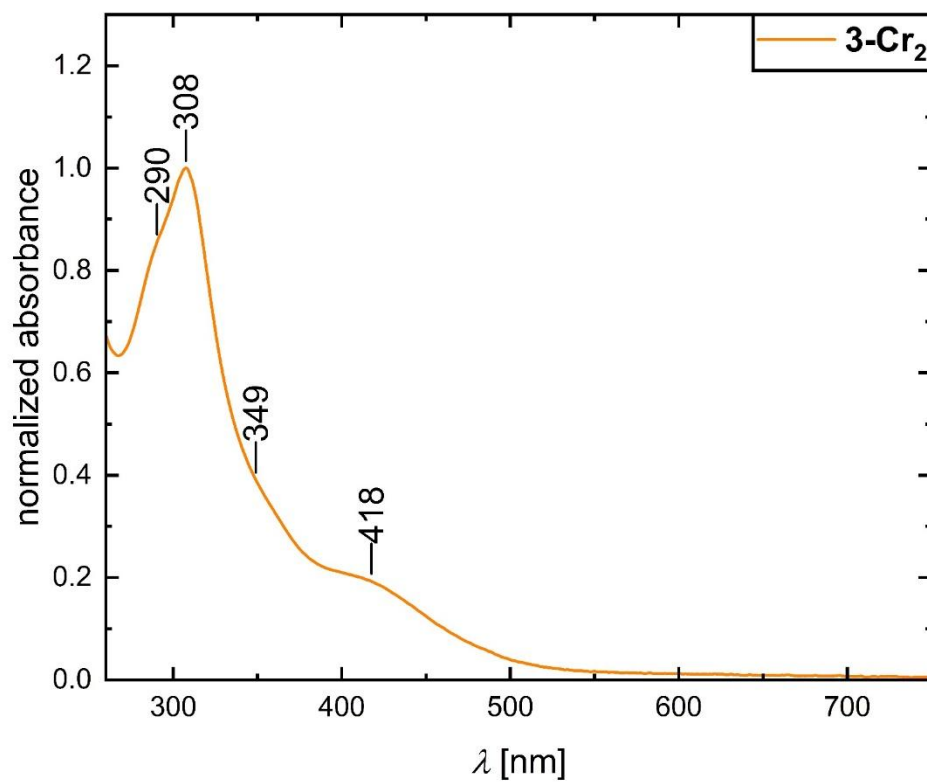

**Figure S59.** UV-vis absorption spectrum of **3-Cr<sub>2</sub>** in THF.  $\lambda_{\text{max}} = 308$ ,  $\lambda_2 = 290$  (shoulder),  $\lambda_3 = 349$  (shoulder),  $\lambda_4 = 418$  (very broad) nm.

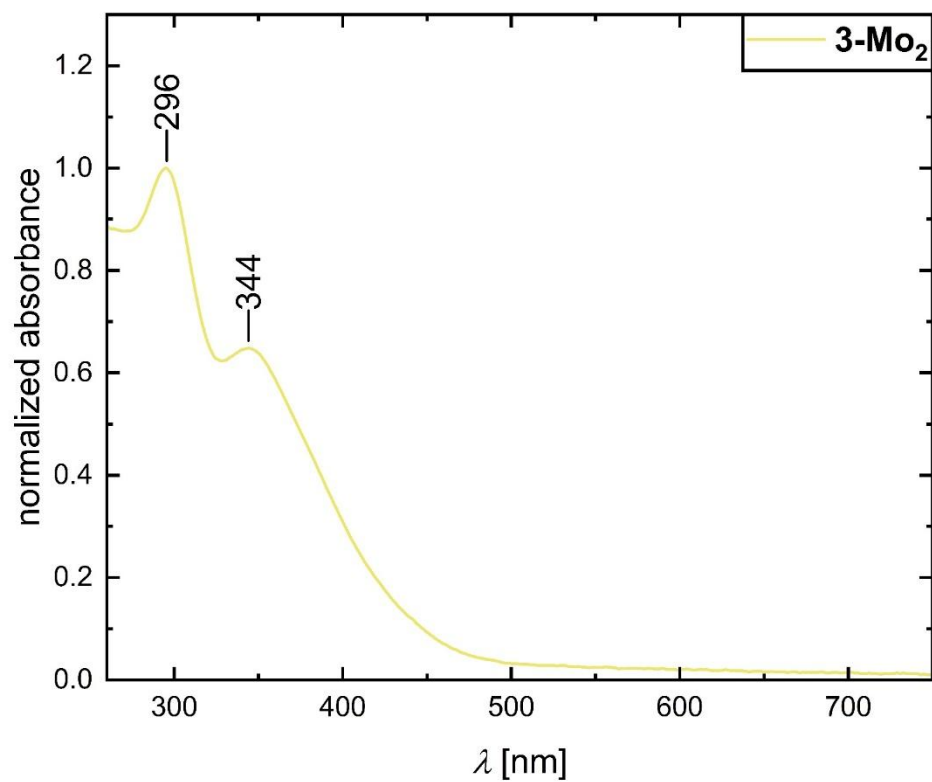

**Figure S60.** UV-vis absorption spectrum of **3-Mo<sub>2</sub>** in THF.  $\lambda_{\text{max}} = 296$ ,  $\lambda_2 = 344$  (broad tailing) nm.

## Cyclic voltammetry

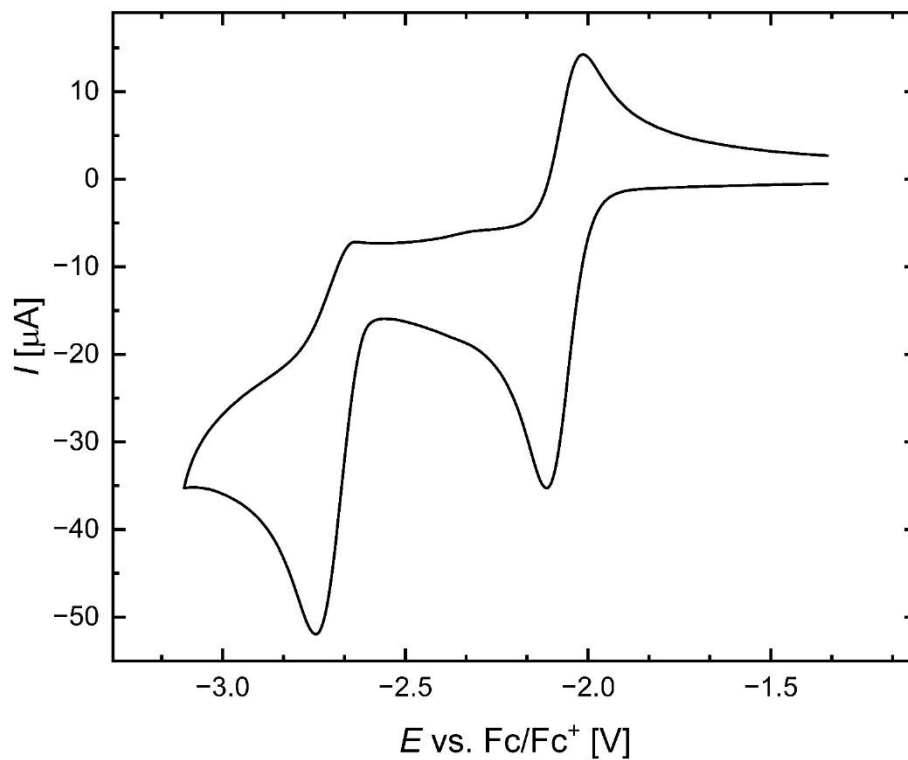

**Figure S61.** Cyclic voltammogram of **2** in THF/0.1 M [*n*Bu<sub>4</sub>N][PF<sub>6</sub>] measured at 250 mV s<sup>-1</sup> with voltammetric response. Formal potentials:  $E_{1/2} = -2.06$  V,  $E^{pc} = -2.71$  V.

## X-ray crystallographic data

All crystal data were collected on a Rigaku XtaLAB Synergy-R diffractometer with a Hybrid Pixel array detector and multi-layer mirror monochromated Cu $K\alpha$  radiation. The structures were solved using the intrinsic phasing method,<sup>3</sup> refined with the ShelXL program<sup>4</sup> and expanded using Fourier techniques. All non-hydrogen atoms were refined anisotropically. Hydrogen atoms were included in structure factor calculations. All hydrogen atoms were assigned to idealized geometric positions unless otherwise stated.

Crystallographic data has been deposited at the Cambridge Crystallographic Data Center as supplementary publication with deposition numbers 2538786-2538794. These data can be obtained free of charge from The Cambridge Crystallographic Data Center *via* [www.ccdc.cam.ac.uk/data\\_request/cif](http://www.ccdc.cam.ac.uk/data_request/cif).

**Table S1.** CCDC numbers of crystallographically characterised compounds.

| Compound                | CCDC number |
|-------------------------|-------------|
| <b>1</b>                | 2538786     |
| <b>2</b>                | 2538789     |
| <b>2-Cr</b>             | 2538793     |
| <b>2-Cr<sub>2</sub></b> | 2538790     |
| <b>2-Mo<sub>2</sub></b> | 2538791     |
| <b>2-W<sub>2</sub></b>  | 2538788     |
| <b>3</b>                | 2538792     |
| <b>3-Cr<sub>2</sub></b> | 2538794     |
| <b>3-Mo<sub>2</sub></b> | 2538787     |

**Crystal data for 1:** C<sub>16</sub>H<sub>16</sub>B<sub>2</sub>Br<sub>2</sub>,  $M_r = 389.73$ , yellow plate, 0.150×0.100×0.020 mm<sup>3</sup>, triclinic space group  $P\bar{1}$ ,  $a = 9.6057(3)$  Å,  $b = 9.6622(4)$  Å,  $c = 10.3382(4)$  Å,  $\alpha = 63.110(4)^\circ$ ,  $\beta = 88.157(3)^\circ$ ,  $\gamma = 66.225(4)^\circ$ ,  $V = 769.77(6)$  Å<sup>3</sup>,  $Z = 2$ ,  $\rho_{\text{calcd}} = 1.681$  g·cm<sup>-3</sup>,  $\mu = 6.530$  mm<sup>-1</sup>,  $F(000) = 384$ ,  $T = 100(2)$  K,  $R_1 = 0.0484$ ,  $wR_2 = 0.1301$ , 2886 independent reflections [ $2\theta \leq 140.144^\circ$ ] and 185 parameters.

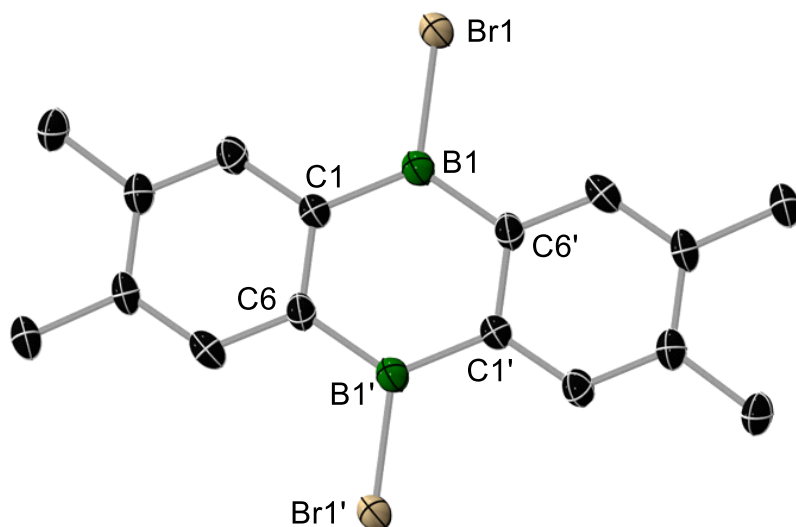

**Figure S62.** Crystallographically determined solid-state structure of one of the two centrosymmetric molecules of **1** present in the asymmetric unit. Hydrogen atoms are omitted for clarity.

**Crystal data for 2:**  $C_{18}H_{22}B_2$ ,  $M_r = 259.97$ , colourless plate,  $0.230 \times 0.110 \times 0.030$  mm<sup>3</sup>, triclinic space group  $P\bar{1}$ ,  $a = 8.3196(3)$  Å,  $b = 9.7359(3)$  Å,  $c = 10.7962(3)$  Å,  $\alpha = 69.942(3)^\circ$ ,  $\beta = 75.684(3)^\circ$ ,  $\gamma = 66.726(3)^\circ$ ,  $V = 748.24(5)$  Å<sup>3</sup>,  $Z = 2$ ,  $\rho_{calcd} = 1.154$  g·cm<sup>-3</sup>,  $\mu = 0.459$  mm<sup>-1</sup>,  $F(000) = 280$ ,  $T = 100(2)$  K,  $R_1 = 0.0708$ ,  $wR_2 = 0.1852$ , 2988 independent reflections [ $2\theta \leq 150.804^\circ$ ] and 187 parameters.

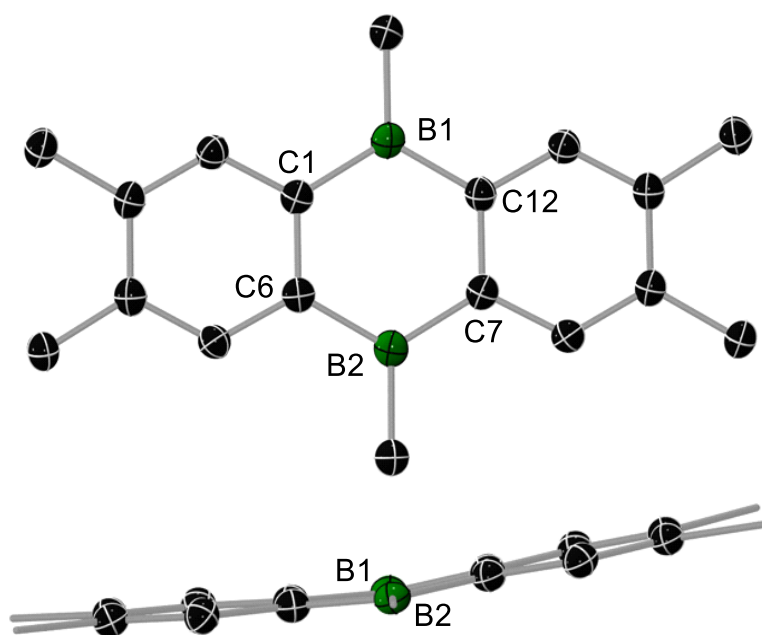

**Figure S63.** Top: crystallographically determined solid-state structure of **2**. Bottom: side view of **2** (methyl group ellipsoids omitted for clarity) showing the bend in the  $C_4B_2$  ring. Atomic displacement ellipsoids are set at 50%. Hydrogen atoms are omitted for clarity.

**Refinement details for 3:** The data was twinned (ca. 10%) but could not be satisfactorily solved as such, and was therefore integrated as a single crystal, hence the high  $wR_2$  value. Some reflections were removed from refinement as outliers: (1 4 10), (1 3 5), (0 1 1), (-4 0 8) and (-6 0 12). The two Li-bound THF molecules were both modelled as twofold disordered in a 39:61 ratio. ADPs within the  $\text{Li}(\text{THF})_2$  fragment were restrained to similarity using SIMU 0.01.

**Crystal data for 3:**  $\text{C}_{34}\text{H}_{54}\text{B}_2\text{Li}_2\text{O}_4$ ,  $M_r = 562.27$ , red block,  $0.180 \times 0.140 \times 0.120 \text{ mm}^3$ , monoclinic space group  $P2_1/c$ ,  $a = 8.7241(2) \text{ \AA}$ ,  $b = 9.44190(10) \text{ \AA}$ ,  $c = 19.9924(4) \text{ \AA}$ ,  $\beta = 96.948(2)^\circ$ ,  $V = 1634.72(5) \text{ \AA}^3$ ,  $Z = 2$ ,  $\rho_{\text{calcd}} = 1.142 \text{ g}\cdot\text{cm}^{-3}$ ,  $\mu = 0.539 \text{ mm}^{-1}$ ,  $F(000) = 612$ ,  $T = 100(2) \text{ K}$ ,  $R_I = 0.0803$ ,  $wR_2 = 0.2148$ , 3100 independent reflections [ $2\theta \leq 140.12^\circ$ ] and 284 parameters.

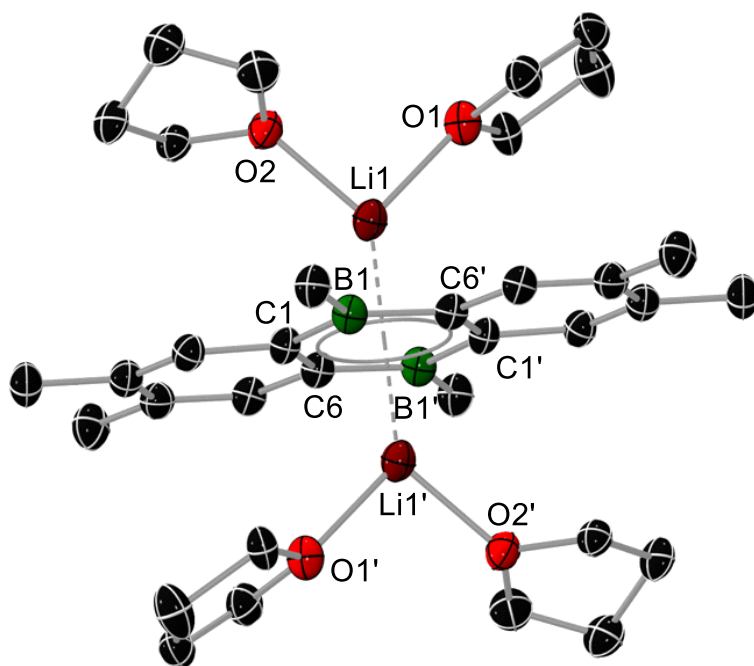

**Figure S64.** Crystallographically determined solid-state structure of **3**. Atomic displacement ellipsoids are set at 50%. Hydrogen atoms are omitted for clarity.

**Crystal data for 2-Cr:**  $C_{21}H_{22}B_2CrO_3$ ,  $M_r = 396.00$ , red block,  $0.300 \times 0.140 \times 0.070 \text{ mm}^3$ , monoclinic space group  $P2_1/n$ ,  $a = 10.14580(10) \text{ \AA}$ ,  $b = 13.7582(2) \text{ \AA}$ ,  $c = 13.59200(10) \text{ \AA}$ ,  $\beta = 91.0970(10)^\circ$ ,  $V = 1896.93(4) \text{ \AA}^3$ ,  $Z = 4$ ,  $\rho_{\text{calcd}} = 1.387 \text{ g}\cdot\text{cm}^{-3}$ ,  $\mu = 5.102 \text{ mm}^{-1}$ ,  $F(000) = 824$ ,  $T = 100(2) \text{ K}$ ,  $R_1 = 0.0708$ ,  $wR_2 = 0.1844$ , 3609 independent reflections [ $2\theta \leq 140.06^\circ$ ] and 250 parameters.

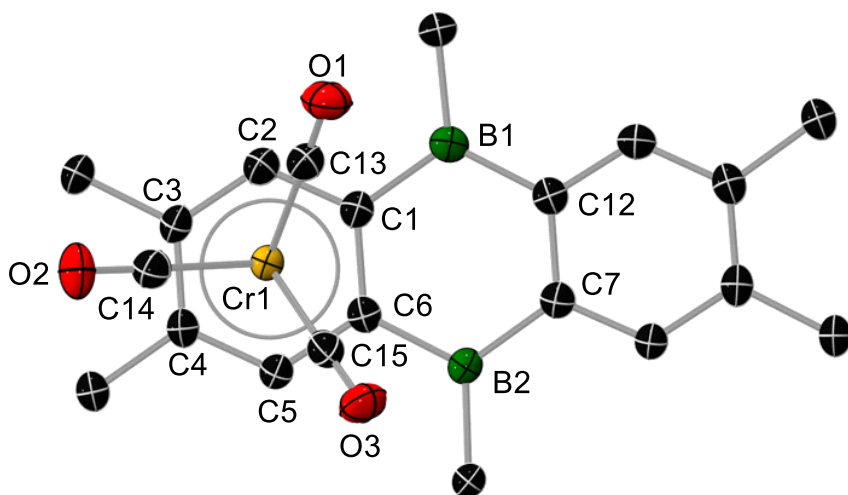

**Figure S65.** Crystallographically determined solid-state structure of **2-Cr**. Atomic displacement ellipsoids are set at 50%. Hydrogen atoms are omitted for clarity.

**Refinement details for 2-Cr<sub>2</sub>:** The data showed multiple minor twinning components amounting to less than 20% overall, which could not be solved satisfactorily. As a result, only data from the major twin component was used for structure solution and refinement. One reflection was removed from refinement as an outlier: (1 16 5).

**Crystal data for 2-Cr<sub>2</sub>:** C<sub>24</sub>H<sub>22</sub>B<sub>2</sub>Cr<sub>2</sub>O<sub>6</sub>,  $M_r = 532.03$ , red block, 0.160×0.090×0.060 mm<sup>3</sup>, monoclinic space group *I*2/*a*,  $a = 12.6159(2)$  Å,  $b = 13.9295(2)$  Å,  $c = 14.9564(3)$  Å,  $\beta = 114.150(2)^\circ$ ,  $V = 2398.30(8)$  Å<sup>3</sup>,  $Z = 4$ ,  $\rho_{\text{calcd}} = 1.473$  g·cm<sup>-3</sup>,  $\mu = 7.785$  mm<sup>-1</sup>,  $F(000) = 1088$ ,  $T = 100(2)$  K,  $R_1 = 0.0641$ ,  $wR_2 = 0.1396$ , 2271 independent reflections [ $2\theta \leq 140.148^\circ$ ] and 157 parameters.

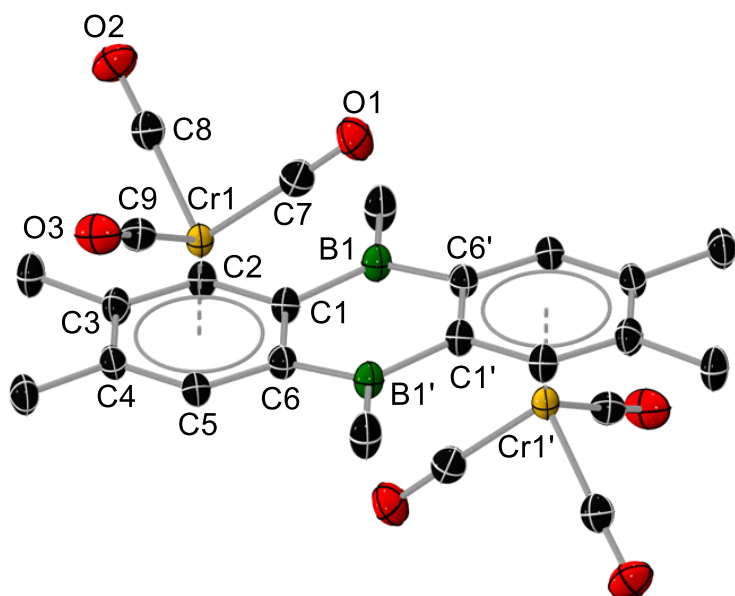

**Figure S66.** Crystallographically determined solid-state structure of 2-Cr<sub>2</sub>. Atomic displacement ellipsoids are set at 50%. Hydrogen atoms are omitted for clarity.

**Refinement details for 2-Mo<sub>2</sub>:** Three reflections were omitted as outliers: (-2 4 13), (-2 6 13) and (-2 2 13).

**Crystal data for 2-Mo<sub>2</sub>:** C<sub>24</sub>H<sub>22</sub>B<sub>2</sub>Mo<sub>2</sub>O<sub>6</sub>,  $M_r = 619.91$ , red block, 0.090×0.050×0.020 mm<sup>3</sup>, monoclinic space group  $P2_1/n$ ,  $a = 8.49810(10)$  Å,  $b = 10.5870(2)$  Å,  $c = 13.5435(2)$  Å,  $\beta = 101.946(2)^\circ$ ,  $V = 1192.11(3)$  Å<sup>3</sup>,  $Z = 2$ ,  $\rho_{\text{calcd}} = 1.727$  g·cm<sup>-3</sup>,  $\mu = 8.939$  mm<sup>-1</sup>,  $F(000) = 616$ ,  $T = 100(2)$  K,  $R_1 = 0.0305$ ,  $wR_2 = 0.0724$ , 2381 independent reflections [ $2\theta \leq 147.542^\circ$ ] and 157

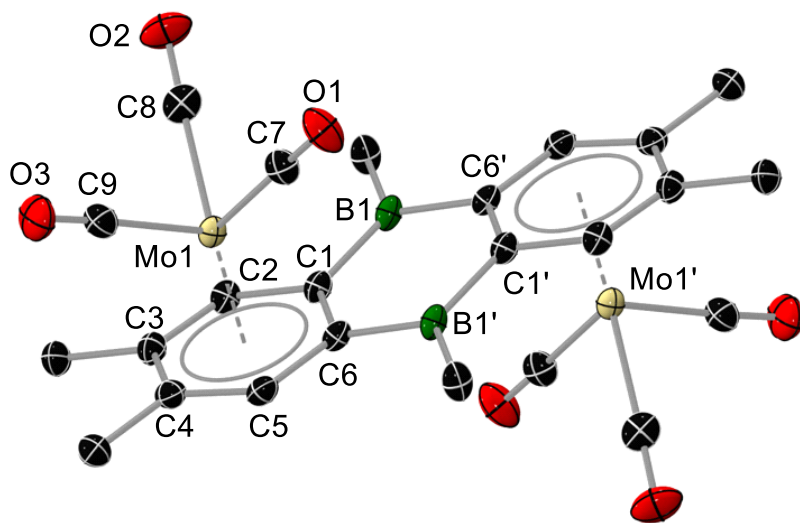

**Figure S67.** Crystallographically determined solid-state structure of **2-Mo<sub>2</sub>**. Atomic displacement ellipsoids are set at 50%. Hydrogen atoms are omitted for clarity.

**Crystal data for 2-W<sub>2</sub>:** C<sub>24</sub>H<sub>22</sub>B<sub>2</sub>O<sub>6</sub>W<sub>2</sub>,  $M_r = 795.73$ , red block, 0.160×0.070×0.040 mm<sup>3</sup>, monoclinic space group  $P2_1/n$ ,  $a = 7.10870(10)$  Å,  $b = 10.15770(10)$  Å,  $c = 16.8094(2)$  Å,  $\beta = 93.3110(10)^\circ$ ,  $V = 1211.75(3)$  Å<sup>3</sup>,  $Z = 2$ ,  $\rho_{\text{calcd}} = 2.181$  g·cm<sup>-3</sup>,  $\mu = 17.607$  mm<sup>-1</sup>,  $F(000) = 744$ ,  $T = 100(2)$  K,  $R_1 = 0.0322$ ,  $wR_2 = 0.0850$ , 2426 independent reflections [ $2\theta \leq 149.944^\circ$ ] and 157 parameters.

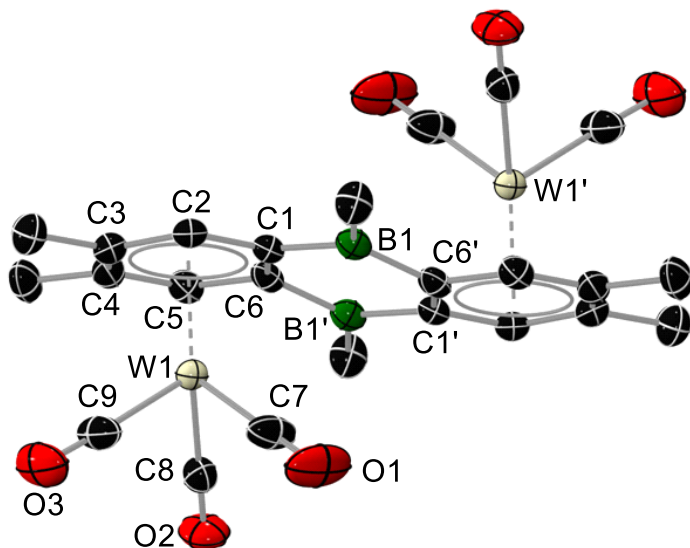

**Figure S68.** Crystallographically determined solid-state structure of 2-W<sub>2</sub>. Atomic displacement ellipsoids are set at 50%. Hydrogen atoms are omitted for clarity.

**Refinement details for 3-Cr<sub>2</sub>:** The asymmetric unit contains two crystallographically distinct molecules of the complex. One CO ligand of the second molecule was modelled as twofold disordered (RESI 21/22 CO) in a 1:1 ratio without additional restraints. All twelve Li-bound THF molecules were modelled as disordered using a total of 13 FVAR in the following ratios: molecule 1 at Li1: (RESI 5/51 THF) 61:39, (RESI 6/61 THF) 50:50, (RESI 7/71 THF) 65:35; molecule 1 at Li2: (RESI 8/81 THF) 69:31, (RESI 9/91 THF) 58:42, (RESI 10/110 THF) 77:33; molecule 2 at Li1: (RESI 11/111 THF) 65:35, (RESI 12/112 THF) 63:33, (RESI 13/113/213 THF) 50:38:12; molecule 2 at Li2: (RESI 14/114 THF) 61:39, (RESI 15/115/215 THF) 44:36:20, (RESI 16/116 THF) 54:46. ADPs within the THF disorders were restrained to similarity with SIMU 0.01, 1,2- and 1,3-distances with SAME.

**Crystal data for 3-Cr<sub>2</sub>:** C<sub>48</sub>H<sub>70</sub>B<sub>2</sub>Cr<sub>2</sub>Li<sub>2</sub>O<sub>12</sub>, *M<sub>r</sub>* = 978.54, orange block, 0.310×0.220×0.160 mm<sup>3</sup>, monoclinic space group *P2<sub>1</sub>/c*, *a* = 41.931(2) Å, *b* = 10.3833(5) Å, *c* = 23.8066(12) Å, β = 104.726(4)°, *V* = 10024.4(9) Å<sup>3</sup>, *Z* = 8, ρ<sub>calcd</sub> = 1.297 g·cm<sup>-3</sup>, μ = 4.046 mm<sup>-1</sup>, *F*(000) = 4144, *T* = 100(2) K, *R<sub>I</sub>* = 0.0401, *wR<sub>2</sub>* = 0.1040, 19053 independent reflections [*2θ* ≤ 140.138°] and 1863 parameters.

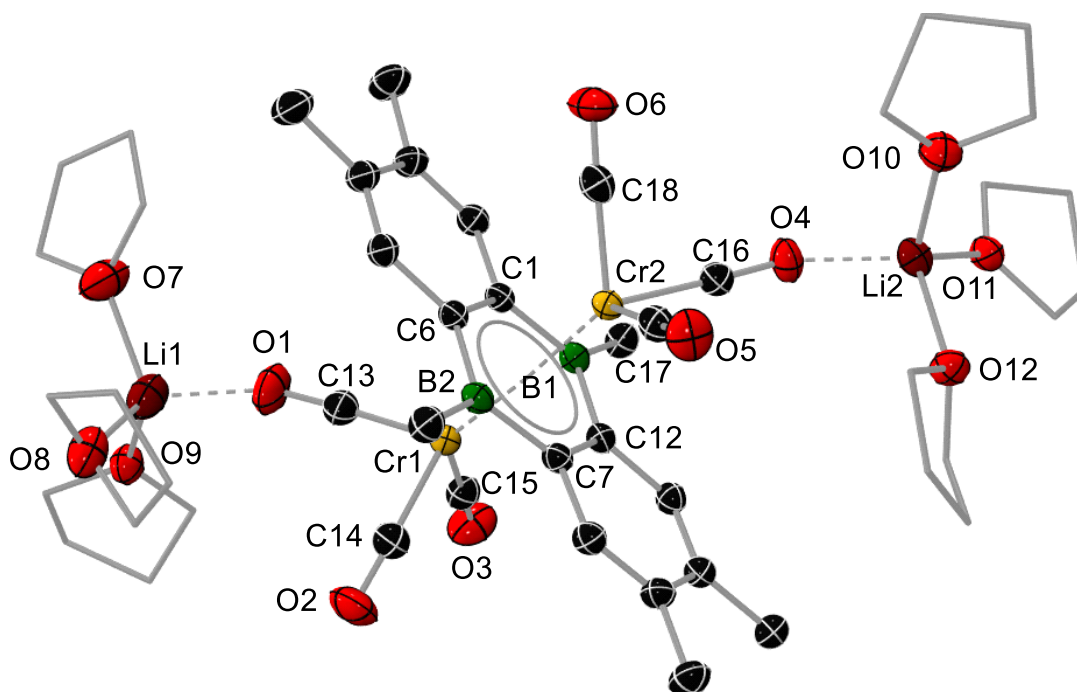

**Figure S69.** Crystallographically determined solid-state structure of one of the two crystallographically distinct molecules of 3-Cr<sub>2</sub> present in the asymmetric unit. Atomic displacement ellipsoids are set at 50%. Hydrogen atoms are omitted for clarity.

**Refinement details for 3-Mo<sub>2</sub>:** The crystal was partially twinned (<10% non-overlapping reflections) but the twinning could not be resolved satisfactorily. Seven outlying reflections had to be omitted: (-5 1 25), (-10 0 20), (-10 1 1), (-11 2 25), (-6 0 24), (-14 0 26) and (-13 1 25). The asymmetric unit contains two crystallographically distinct molecules of the complex. One CO ligand of the second molecule was modelled as twofold disordered (RESI 44/444 CO) in a 60:40 ratio. ADPs within this disorder were restrained to similarity with Mo1\_4 using SIMU 0.01. All twelve Li-bound THF molecules were modelled as disordered using a total of 9 FVAR in the following ratios: molecule 1 at Li1: (RESI 5/51 THF) 71:29, (RESI 6/61 THF) 70:30, (RESI 7/71 THF) 67:33; molecule 1 at Li2: (RESI 8/81 THF) 57:43, (RESI 9/91 THF) 60:40, (RESI 10/101 THF) 78:22; molecule 2 at Li1: (RESI 11/111 THF) 60:40, (RESI 12/121 THF) 61:41, (RESI 13/131 THF) 75:25; molecule 2 at Li2: (RESI 14/141 THF) 61:39, (RESI 15/151 THF) 60:40, (RESI 16/116 THF) 60:40. ADPs within the THF disorders were restrained to similarity with SIMU 0.008, 1,2- and 1,3-distances with SAME. The Li2–O8/81 and Li2–O15/151 distances were restrained to similarity using SADI 0.005.

**Crystal data for 3-Mo<sub>2</sub>:** C<sub>48</sub>H<sub>70</sub>B<sub>2</sub>Li<sub>2</sub>Mo<sub>2</sub>O<sub>12</sub>,  $M_r = 1066.42$ , yellow plate, 0.350×0.290×0.150 mm<sup>3</sup>, monoclinic space group  $P2_1/c$ ,  $a = 42.0401(4)$  Å,  $b = 10.40700(10)$  Å,  $c = 24.2315(2)$  Å,  $\beta = 105.1540(10)^\circ$ ,  $V = 10232.90(17)$  Å<sup>3</sup>,  $Z = 8$ ,  $\rho_{\text{calcd}} = 1.384$  g·cm<sup>-3</sup>,  $\mu = 4.480$  mm<sup>-1</sup>,  $F(000) = 4432$ ,  $T = 100(2)$  K,  $R_1 = 0.0732$ ,  $wR_2 = 0.1589$ , 19427 independent reflections [ $2\theta \leq 140.148^\circ$ ] and 1768 parameters.

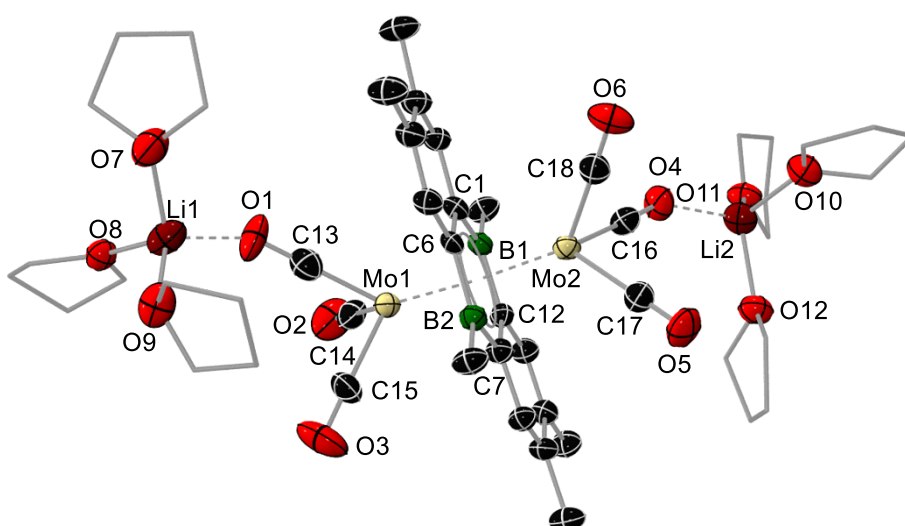

**Figure S70.** Crystallographically determined solid-state structure of one of the two crystallographically distinct molecules of **3-Mo<sub>2</sub>** present in the asymmetric unit. Atomic displacement ellipsoids are set at 50%. Hydrogen atoms are omitted for clarity.

## Computational details

Density functional theory (DFT) calculations were carried out with Turbomole version 7.9<sup>5</sup> as implemented in the user interface TmoleX2024.<sup>6</sup> Optimizations were carried out at the  $\omega$ B97X<sup>7</sup>-D4<sup>8</sup>-def2-SVP<sup>9,10</sup> level of theory using the relevant crystallography-derived solid-state structures as starting points, where possible. True minima were confirmed by frequency calculations, which provided no imaginary frequencies. Wiberg bond indices (WBI)<sup>11</sup> and natural bond orbital (NBO)<sup>12</sup> charges were computed within the TmoleX2024 SCF Population Properties module. Bond critical points (BCPs) were calculated using the atoms in molecules (AIM)<sup>13</sup> module implemented in TmoleX2024. Intrinsic bond orbitals (IBOs)<sup>14</sup> were computed with the Turbomole program “proper”. Plots of the frontier MOs and IBOs were generated with the TmoleX2024 3D-Visualizer module.

**Table S2.** Comparison of selected experimental and calculated [in square brackets] structural parameters for **2**, **2-Cr**, **2-Cr<sub>2</sub>**, **3** and **3-Cr<sub>2</sub>**. Optimisations carried out at the  $\omega$ B97X-D4-def2-SVP level of theory.

|                                      | $\overline{a/a'}$             | $\overline{e/e'}$             | $\overline{M \cdots DBA}$ | $\overline{M-C_{d/e}}$        | $ \omega_{\max} $ |
|--------------------------------------|-------------------------------|-------------------------------|---------------------------|-------------------------------|-------------------|
| <b>2</b>                             | 1.565(2) [1.577]              | 1.419(2) [1.418]              | –                         | –                             | 10.6(2) [6.0]     |
| <b>3</b>                             | 1.531(3) [1.538]              | 1.472(3) [1.458]              | 1.87 [1.85]               | 2.385(4) [1.383] <sup>c</sup> | 1.1(3) [0.1]      |
| <b>2-Cr</b>                          | 1.573(4) [1.582] <sup>a</sup> | 1.433(4) [1.428] <sup>a</sup> | 1.72 [1.68]               | 2.193(3) [2.184] <sup>c</sup> | 8.4(4) [4.6]      |
|                                      | 1.557(4) [1.572] <sup>b</sup> | 1.421(4) [1.419] <sup>b</sup> |                           | 2.263(3) [2.229] <sup>d</sup> |                   |
| <b>2-Cr<sub>2</sub></b>              | 1.559(3) [1.572]              | 1.451(3) [1.446]              | 1.71 [1.68]               | 2.201(2) [2.184] <sup>c</sup> | 2.5(3) [1.8]      |
|                                      |                               |                               |                           | 2.263(2) [2.230] <sup>d</sup> |                   |
| <b>3-Cr<sub>2</sub></b> <sup>e</sup> | 1.551(3) [1.555]              | 1.457(2) [1.446]              | 1.78 [1.77]               | 2.287(2) [2.275]              | 2.0(2) [0.6]      |
|                                      |                               |                               |                           | 2.369(2) [2.355] <sup>f</sup> |                   |

<sup>a</sup> Within the metal-containing complex moiety; <sup>b</sup> within the metal-free complex moiety; <sup>c</sup>  $\overline{M-C_{e/e'}}$ ; <sup>d</sup>  $\overline{M-C_{d/d'}}$ ; <sup>e</sup> values provided for both molecules present in the asymmetric unit; <sup>f</sup> different avg. values measured for the e and e' edges.

NMR shielding calculations for the determination of nuclear-independent chemical shifts (NICS)<sup>15</sup> were carried out at the B3LYP<sup>16</sup>-D4-def2-SVP level of theory on the previously optimised structures. For NICS calculations a dummy atom Q1 was generated at the centre of one of the 9,10-(DH)DBA rings using the TmoleX option “add atom at centre” in the molecule viewer. The entire molecule was then translated so that this Q1 atom would be at the coordinates (0, 0, 0). The entire molecule was then rotated so that corresponding ring would be in the (x, y) plane, before adding two more dummy atoms Q2 and Q3 at the coordinates (0, 0, 1) and (0, 0, -1), respectively. This procedure was repeated for all three (DH)DBA rings, providing a total of nine dummy atoms (Figure S70), three at the ring centres for determining NICS(0) values, and three each at 1 Å above and below the rings, respectively, for determining NICS(1) and NICS( $\pm 1$ )<sub>zz</sub> values.

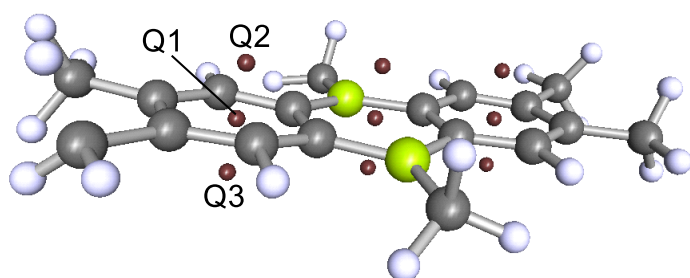

**Figure S71.** Dummy atoms for NICS calculations added to the optimised structure of compound **2** at the  $\omega$ B97X-D4-def2-SVP level of theory. Atom colours: white = hydrogen, grey = carbon, green = boron, brown = dummy atoms.

Optimisation of the putative  $\eta^6$ -C<sub>4</sub>B<sub>2</sub> isomer of **2-Cr** at the  $\omega$ B97X-D4-def2-SVP level of theory converges to a minimum for the eclipsed conformation, **2'-Cr** (Figure S71).

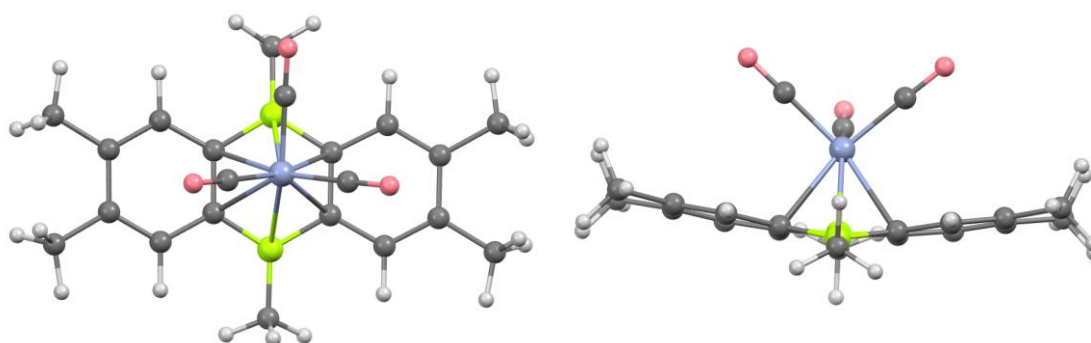

**Figure S72.** Two views of the optimised structure of **2'-Cr** at the  $\omega$ B97X-D4-def2-SVP level of theory. Atom colours: white = hydrogen, grey = carbon, green = boron, salmon = oxygen, steel = chromium.

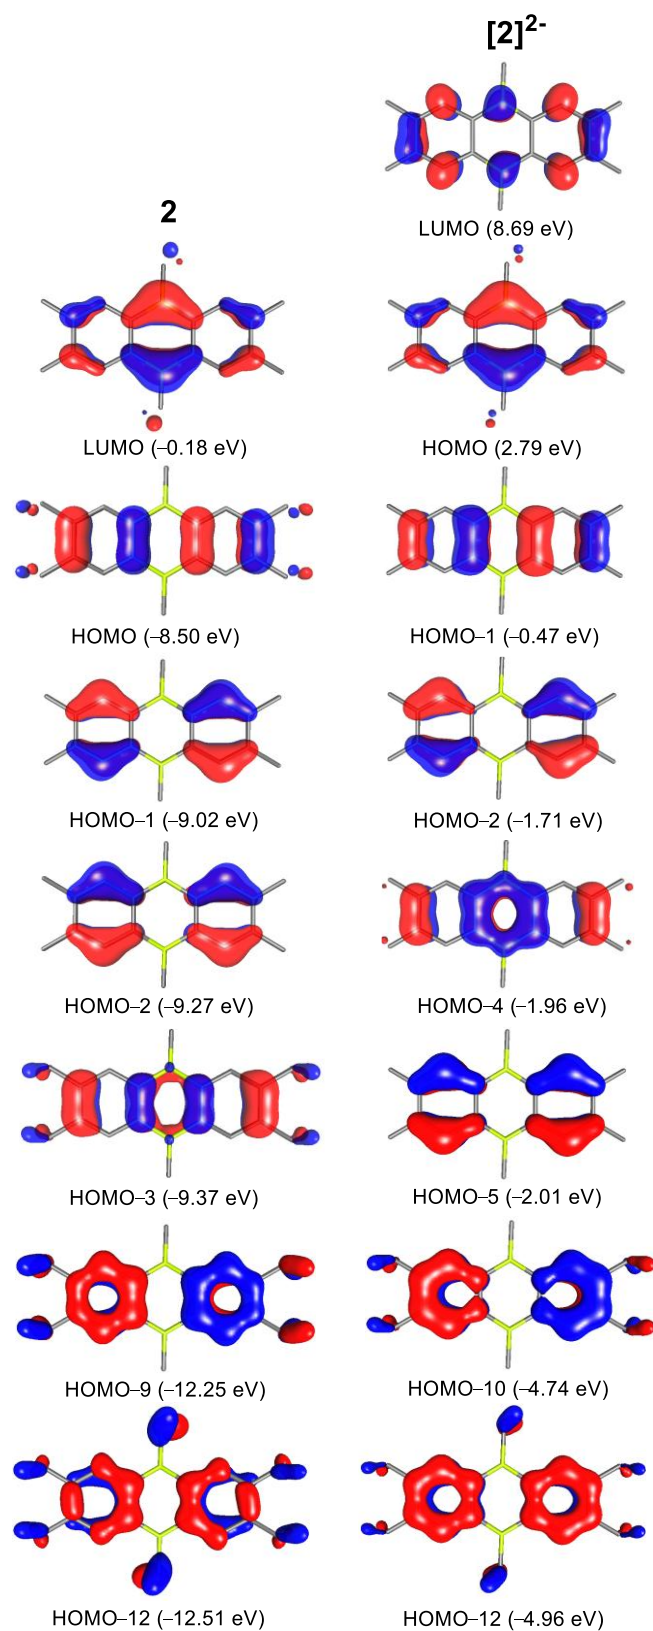

**Figure S73.** Plots of the frontier MOs of  $\pi$  symmetry of **2** (left) and  $[2]^{2-}$  (right) with their energy levels in parentheses. Hydrogen atoms omitted for clarity. Isovalues: 0.04.

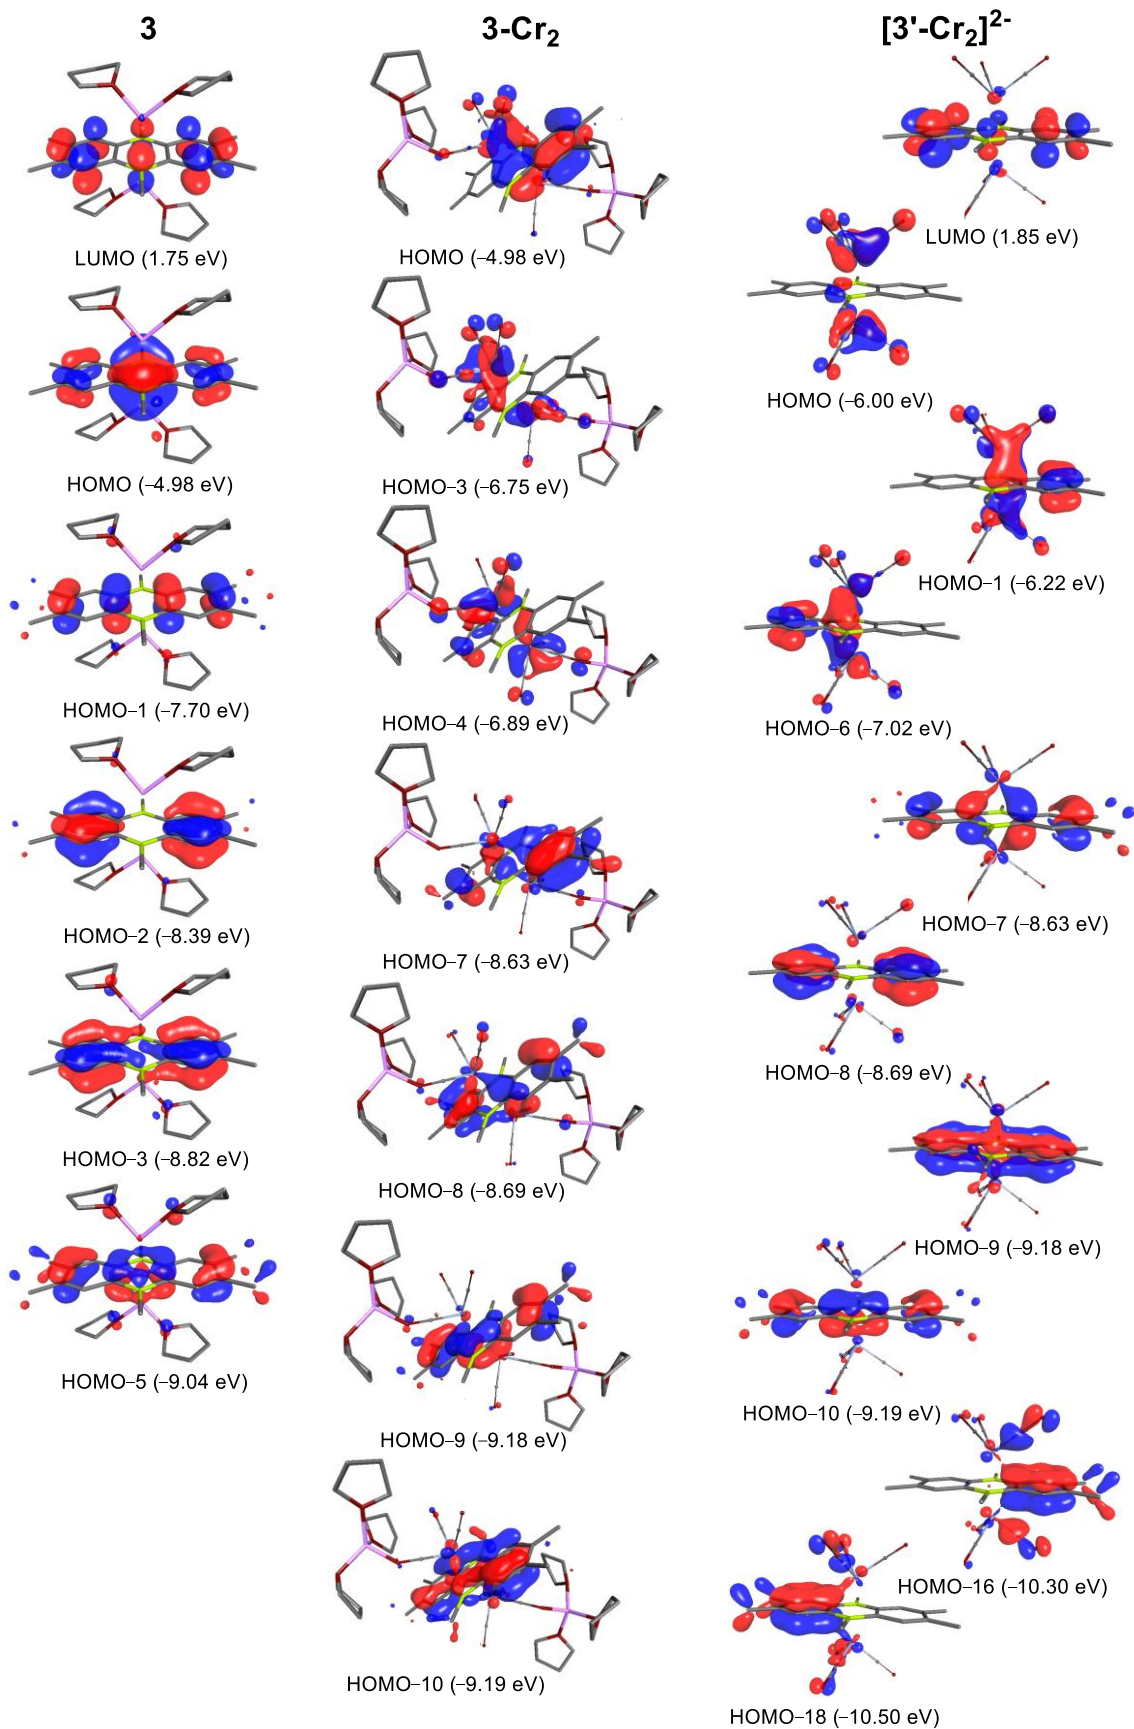

**Figure S74.** Plots of the frontier MOs of  $\pi$  symmetry of **3** (left), **3-Cr<sub>2</sub>** (centre) and **[3'-Cr<sub>2</sub>]<sup>2-</sup>** (right) with their energy levels in parentheses. Hydrogen atoms omitted for clarity. Isovalues: 0.04.

To determine the conformational minimum for **2-Cr**, a fixed dummy atom Q was added at the centre of the Cr-capped benzo ring and the C1–Q–Cr1–C5 torsion angle  $\beta$  was fixed to a value between  $-30^\circ$  and  $+30^\circ$  in  $5^\circ$  increments. At each value of  $\beta$  the geometry was optimised at the  $\omega$ B97X-D4-def2-SVP level of theory and the final SCF energies plotted against  $\beta$  (Figure S72).

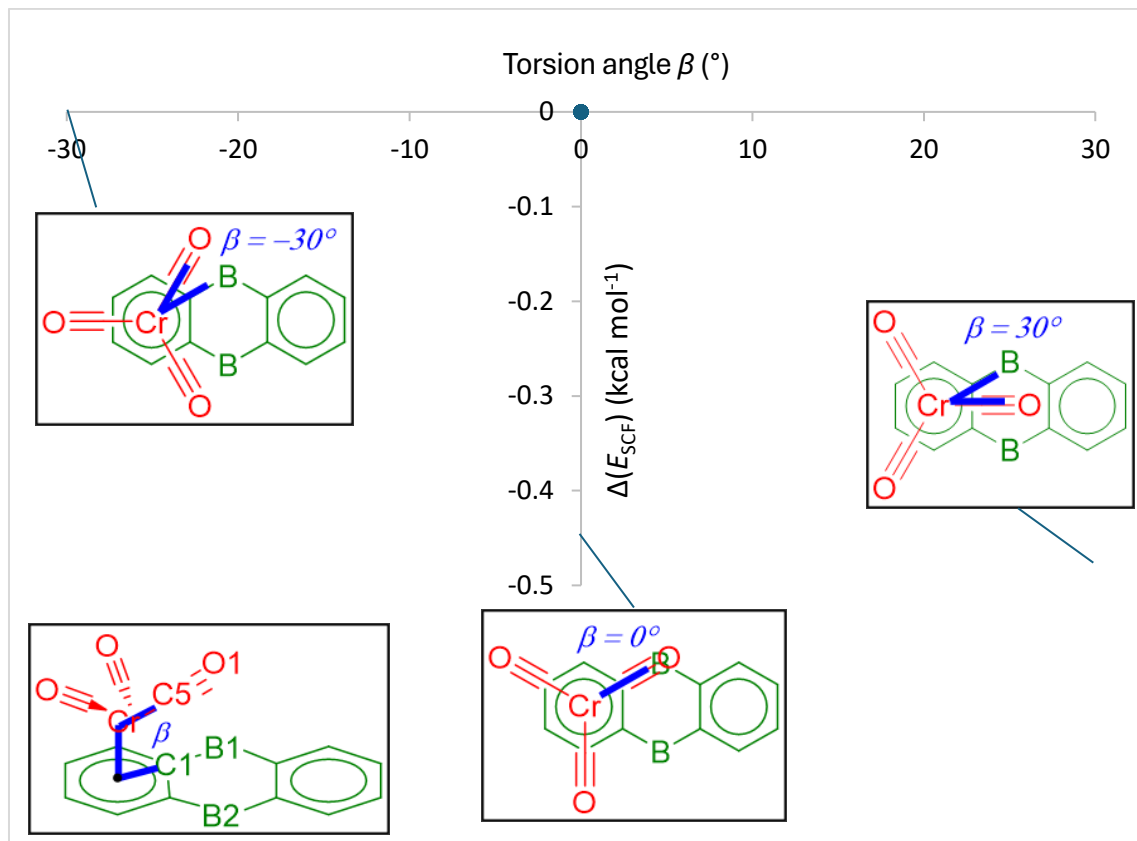

**Figure S75.** Evolution of the SCF energy of **2-Cr**, depending on the torsion angle  $\beta$ .

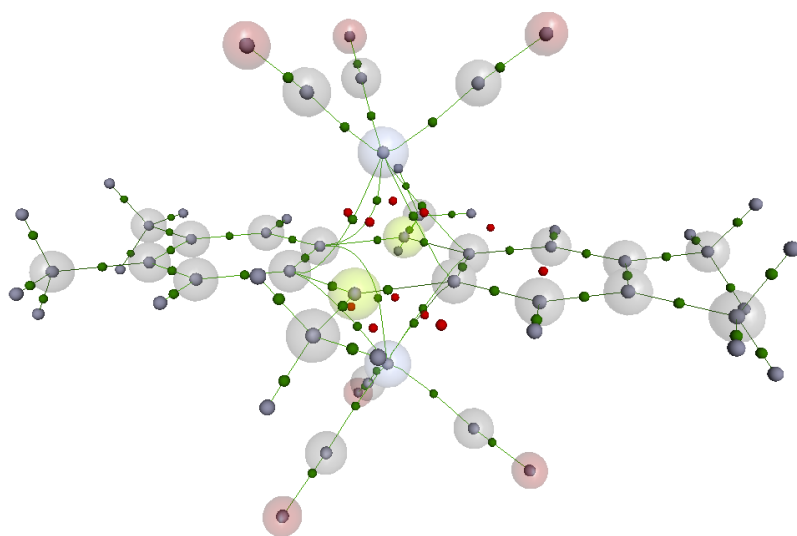

**Figure S76.** Bond critical points (dark green dots), bond paths (light green lines), and ring points (red dots) of  $[3'-\text{Cr}_2]^{2-}$ .

## Cartesian coordinates of optimised compounds

Benzene (including NICS dummy atoms)

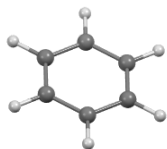

$E_{\text{SFC}} = -232.0171050$  Ha

$\nu_{\text{min}} = 420.56$  cm<sup>-1</sup>

|   |           |           |           |
|---|-----------|-----------|-----------|
| C | -1.088171 | -0.872226 | 0.000002  |
| C | 0.211279  | -1.378477 | -0.000002 |
| C | 1.299466  | -0.506281 | 0.000000  |
| C | 1.088153  | 0.872210  | 0.000001  |
| C | -0.211294 | 1.378461  | -0.000001 |
| C | -1.299483 | 0.506263  | -0.000001 |
| H | -1.941593 | -1.556295 | 0.000008  |
| H | 0.376929  | -2.459592 | -0.000008 |
| H | 2.318527  | -0.903455 | 0.000003  |
| H | 1.941579  | 1.556274  | 0.000001  |
| H | -0.376951 | 2.459575  | -0.000001 |
| H | -2.318541 | 0.903444  | -0.000003 |
| Q | 0.000000  | 0.000000  | 0.000000  |
| Q | 0.000000  | 0.000000  | 1.000000  |
| Q | 0.000000  | 0.000000  | -1.000000 |

**2** (including NICS dummy atoms)

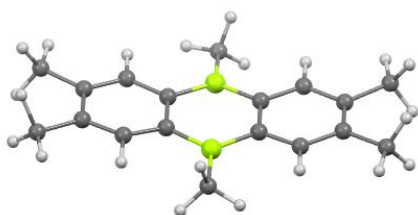

$E_{\text{SFC}} = -748.2261786$  Ha

$\nu_{\text{min}} = 15.46$  cm<sup>-1</sup>

|   |           |           |           |
|---|-----------|-----------|-----------|
| B | -1.513603 | -0.016267 | -0.172292 |
| C | -0.718390 | 1.345743  | -0.115790 |
| C | -1.397248 | 2.569242  | -0.060189 |
| H | -2.492802 | 2.577187  | -0.069333 |
| C | -0.738781 | 3.800760  | -0.060921 |
| C | 0.665524  | 3.816441  | 0.021977  |
| C | 1.350224  | 2.599696  | -0.047580 |
| H | 2.444886  | 2.632415  | -0.046598 |

|   |           |           |           |
|---|-----------|-----------|-----------|
| C | 0.699383  | 1.360984  | -0.109568 |
| B | 1.513233  | 0.012834  | -0.157701 |
| C | 0.717402  | -1.347237 | -0.071442 |
| C | 1.394932  | -2.564947 | 0.142832  |
| H | 2.490793  | -2.576817 | 0.029847  |
| C | 0.737253  | -3.797853 | 0.128402  |
| C | -0.668444 | -3.813466 | 0.119176  |
| C | -1.352147 | -2.599131 | 0.008795  |
| H | -2.446676 | -2.632063 | -0.001200 |
| C | -0.700554 | -1.362490 | -0.079960 |
| C | -1.520828 | 5.086338  | 0.084108  |
| H | -1.301633 | 5.646687  | 0.992429  |
| H | -2.603465 | 4.897461  | 0.063223  |
| H | -1.276021 | 5.751331  | -0.760341 |
| C | 1.416636  | 5.118915  | 0.098759  |
| H | 2.503332  | 4.953947  | 0.089948  |
| H | 1.165202  | 5.674567  | 1.017089  |
| H | 1.166800  | 5.777994  | -0.748890 |
| C | 3.092743  | -0.005276 | -0.240928 |
| H | 3.464456  | -0.794571 | -0.913425 |
| H | 3.478938  | -0.220994 | 0.807096  |
| H | 3.553971  | 0.945560  | -0.542887 |
| C | 1.516498  | -5.080739 | 0.242705  |
| H | 1.262413  | -5.564346 | 1.411590  |
| H | 2.599389  | -4.892410 | 0.231896  |
| H | 1.285437  | -5.786363 | -0.355925 |
| C | -1.420406 | -5.113508 | 0.223090  |
| H | -2.506955 | -4.949179 | 0.197999  |
| H | -1.178909 | -5.643986 | 1.158801  |
| H | -1.161214 | -5.795261 | -0.603559 |
| C | -3.092014 | 0.003484  | -0.274806 |
| H | -3.557999 | -0.962676 | -0.513750 |
| H | -3.444367 | 0.743854  | -1.010998 |
| H | -3.499816 | 0.331120  | 0.699751  |
| Q | 0.000000  | 0.000000  | 0.000000  |
| Q | 0.000000  | 0.000000  | 1.000000  |
| Q | 0.000000  | 0.000000  | -1.000000 |
| Q | 0.021475  | -2.581537 | 0.020843  |
| Q | 0.021158  | -2.493485 | 1.016957  |
| Q | 0.021792  | -2.669589 | -0.975271 |
| Q | -0.023494 | 2.582247  | -0.049325 |
| Q | -0.013503 | 2.542259  | 0.949805  |
| Q | -0.033486 | 2.622237  | -1.048495 |

[2]<sup>2-</sup> (including NICS dummy atoms)

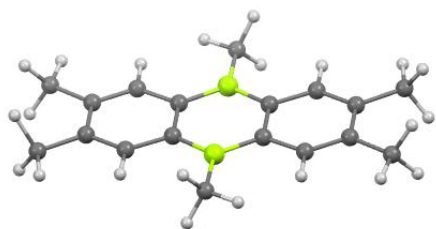

$E_{\text{SFC}} = -748.1310879 \text{ Ha}$

$\nu_{\text{min}} = 36.45 \text{ cm}^{-1}$

|   |           |           |           |
|---|-----------|-----------|-----------|
| B | -1.530875 | -0.011378 | 0.003841  |
| C | -0.737062 | 1.294798  | 0.008661  |
| C | -1.397041 | 2.565712  | 0.021792  |
| H | -2.498381 | 2.569450  | 0.026988  |
| C | -0.763134 | 3.788649  | 0.029869  |
| C | 0.677215  | 3.807762  | 0.023234  |
| C | 1.346754  | 2.603803  | 0.010249  |
| H | 2.446778  | 2.645536  | 0.005633  |
| C | 0.726620  | 1.312766  | 0.003332  |
| B | 1.530880  | 0.011459  | -0.006651 |
| C | 0.737076  | -1.294740 | -0.007087 |
| C | 1.397065  | -2.565718 | -0.009725 |
| H | 2.498401  | -2.569473 | -0.013611 |
| C | 0.763168  | -3.788684 | -0.006747 |
| C | -0.677185 | -3.807762 | -0.001378 |
| C | -1.346721 | -2.603739 | 0.000062  |
| H | -2.446752 | -2.645512 | 0.004494  |
| C | -0.726599 | -1.312692 | -0.002153 |
| C | -1.542596 | 5.080695  | 0.045785  |
| H | -1.321202 | 5.704881  | 0.934907  |
| H | -2.626901 | 4.878601  | 0.048607  |
| H | -1.329295 | 5.722387  | -0.832826 |
| C | 1.421227  | 5.120878  | 0.030295  |
| H | 2.510752  | 4.948897  | 0.022557  |
| H | 1.191982  | 5.740142  | 0.920869  |
| H | 1.181893  | 5.755215  | -0.846945 |
| C | 3.166975  | -0.020586 | -0.012618 |
| H | 3.574048  | -0.571692 | -0.885100 |
| H | 3.582412  | -0.532149 | 0.880043  |
| H | 3.632791  | 0.982097  | -0.037336 |
| C | 1.542660  | -5.080806 | -0.008604 |
| H | 1.333501  | -5.672208 | 1.104514  |
| H | 2.626962  | -4.878728 | -0.013129 |
| H | 1.321702  | -5.714655 | -0.890972 |
| C | -1.421251 | -5.120857 | 0.003674  |
| H | -2.510780 | -4.948738 | 0.006182  |
| H | -1.184687 | -5.745436 | 0.888645  |
| H | -1.189316 | -5.749990 | -0.879240 |

|   |           |           |           |
|---|-----------|-----------|-----------|
| C | -3.166953 | 0.020508  | 0.008859  |
| H | -3.632677 | -0.982064 | -0.021029 |
| H | -3.579429 | 0.578707  | -0.856588 |
| H | -3.576984 | 0.524653  | 0.908183  |
| Q | 0.000000  | 0.000000  | 0.000000  |
| Q | 0.000000  | 0.000000  | 1.000000  |
| Q | 0.000000  | 0.000000  | -1.000000 |
| Q | 0.024467  | -2.562222 | -0.004505 |
| Q | 0.024500  | -2.552263 | 0.995493  |
| Q | 0.024500  | -2.572263 | -1.004407 |
| Q | -0.024442 | 2.562248  | 0.016190  |
| Q | -0.024400 | 2.562200  | 1.016200  |
| Q | -0.024400 | 2.562200  | -0.983800 |

## 2-Cr

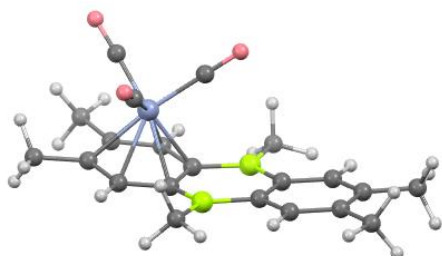

$$E_{\text{SFC}} = -2132.273890826 \text{ Ha}$$

$$\nu_{\text{min}} = 18.49 \text{ cm}^{-1}$$

|    |          |          |           |
|----|----------|----------|-----------|
| Cr | 7.275331 | 4.127975 | 10.159101 |
| B  | 6.176039 | 5.759843 | 7.494013  |
| B  | 6.055911 | 2.724091 | 7.418532  |
| C  | 6.255947 | 7.333729 | 7.571881  |
| H  | 5.495796 | 7.778590 | 8.232733  |
| H  | 6.201081 | 7.841259 | 6.598822  |
| H  | 7.239871 | 7.590988 | 8.009533  |
| C  | 6.013183 | 1.146795 | 7.415174  |
| H  | 5.234891 | 0.725721 | 8.070170  |
| H  | 6.983401 | 0.792423 | 7.814030  |
| H  | 5.899557 | 0.698160 | 6.418391  |
| C  | 6.538359 | 4.967216 | 6.186147  |
| C  | 6.956224 | 5.644388 | 5.034349  |
| H  | 7.009368 | 6.737774 | 5.042500  |
| C  | 7.325829 | 4.987270 | 3.856704  |
| C  | 7.270769 | 3.583541 | 3.821913  |
| C  | 6.848464 | 2.899847 | 4.966264  |
| H  | 6.815552 | 1.806585 | 4.920009  |
| C  | 6.482653 | 3.549845 | 6.150951  |
| C  | 5.725121 | 3.510466 | 8.750339  |
| C  | 5.782474 | 4.936472 | 8.786417  |
| C  | 5.630629 | 5.587854 | 10.048126 |

|   |          |          |           |
|---|----------|----------|-----------|
| H | 5.704580 | 6.677167 | 10.096394 |
| C | 5.492504 | 4.889770 | 11.258439 |
| C | 5.435973 | 3.455712 | 11.222707 |
| C | 5.520851 | 2.811021 | 9.978555  |
| H | 5.509169 | 1.718224 | 9.972192  |
| C | 7.777027 | 5.766311 | 2.650565  |
| H | 8.799945 | 5.484814 | 2.351648  |
| H | 7.767372 | 6.847664 | 2.846703  |
| H | 7.127576 | 5.572524 | 1.781165  |
| C | 7.662185 | 2.832439 | 2.577815  |
| H | 7.560859 | 1.747019 | 2.717510  |
| H | 8.706975 | 3.041982 | 2.295734  |
| H | 7.036748 | 3.124995 | 1.718574  |
| C | 5.387303 | 5.630124 | 12.564626 |
| H | 4.377287 | 5.520212 | 12.990966 |
| H | 5.583977 | 6.701733 | 12.422582 |
| H | 6.103067 | 5.250904 | 13.308751 |
| C | 5.271626 | 2.660625 | 12.490198 |
| H | 4.272050 | 2.825145 | 12.923595 |
| H | 6.012783 | 2.945513 | 13.251370 |
| H | 5.386532 | 1.585720 | 12.293776 |
| C | 8.499648 | 5.393421 | 9.606239  |
| O | 9.063744 | 1.927496 | 9.192087  |
| O | 9.248513 | 6.200310 | 9.270233  |
| C | 8.387741 | 2.783551 | 9.559450  |
| O | 8.577926 | 4.029503 | 12.845922 |
| C | 8.120769 | 4.066147 | 11.789281 |

## 2'-Cr

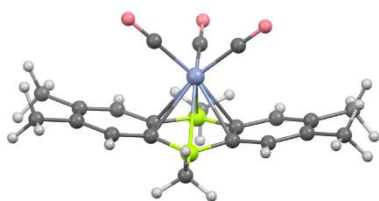

$$E_{\text{SFC}} = -2132.23820630756 \text{ Ha}$$

$$\nu_{\text{min}} = 27.55 \text{ cm}^{-1}$$

|    |           |          |           |
|----|-----------|----------|-----------|
| Cr | 19.748112 | 5.231579 | 24.490431 |
| O  | 17.230019 | 5.643267 | 26.063746 |
| C  | 18.195490 | 5.470871 | 25.466943 |
| O  | 20.660397 | 7.670596 | 25.926035 |
| C  | 20.326905 | 6.752916 | 25.309893 |
| O  | 21.270462 | 3.801439 | 26.639675 |
| C  | 20.674209 | 4.340448 | 25.819863 |
| B  | 19.490438 | 3.977061 | 22.194689 |
| B  | 20.650669 | 6.703897 | 22.909494 |

|   |           |          |           |
|---|-----------|----------|-----------|
| C | 18.924581 | 2.594424 | 21.685769 |
| H | 18.075374 | 2.695198 | 20.993760 |
| H | 18.549180 | 2.035209 | 22.565378 |
| H | 19.686358 | 1.956870 | 21.212846 |
| C | 21.318410 | 8.146891 | 22.904177 |
| H | 20.654236 | 8.944714 | 23.268579 |
| H | 21.583644 | 8.398934 | 21.861621 |
| H | 22.243820 | 8.210658 | 23.495759 |
| C | 18.558222 | 5.220113 | 22.394012 |
| C | 17.144513 | 5.085858 | 22.321199 |
| H | 16.715066 | 4.091482 | 22.158966 |
| C | 16.282457 | 6.156846 | 22.454882 |
| C | 16.833509 | 7.455688 | 22.646102 |
| C | 18.207329 | 7.601061 | 22.718784 |
| H | 18.610876 | 8.606516 | 22.874261 |
| C | 19.110803 | 6.513883 | 22.612340 |
| C | 21.531822 | 5.393565 | 22.958616 |
| C | 22.880894 | 5.436700 | 23.391309 |
| H | 23.349151 | 6.412448 | 23.554705 |
| C | 23.637371 | 4.303315 | 23.631300 |
| C | 23.047695 | 3.021940 | 23.438374 |
| C | 21.743153 | 2.955144 | 22.988684 |
| H | 21.300178 | 1.966628 | 22.826772 |
| C | 20.953708 | 4.110939 | 22.738964 |
| C | 14.791206 | 5.966499 | 22.401946 |
| H | 14.317644 | 6.285832 | 23.344492 |
| H | 14.529978 | 4.912725 | 22.231815 |
| H | 14.336855 | 6.565616 | 21.596452 |
| C | 15.926196 | 8.647784 | 22.781543 |
| H | 16.502422 | 9.573026 | 22.919795 |
| H | 15.249818 | 8.535501 | 23.644320 |
| H | 15.289638 | 8.771014 | 21.890414 |
| C | 23.836836 | 1.773524 | 23.724051 |
| H | 23.245219 | 0.871539 | 23.514192 |
| H | 24.149208 | 1.736321 | 24.780260 |
| H | 24.755229 | 1.729105 | 23.116790 |
| C | 25.060278 | 4.415226 | 24.106109 |
| H | 25.755359 | 3.915847 | 23.411855 |
| H | 25.189426 | 3.933878 | 25.089017 |
| H | 25.367522 | 5.465976 | 24.199693 |

**2-Cr<sub>2</sub>**

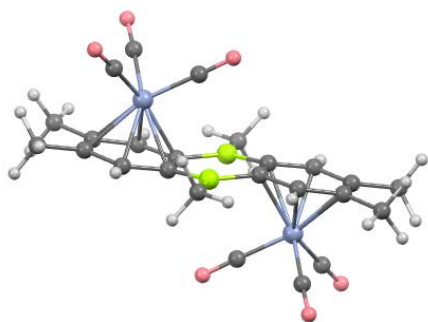

$$E_{\text{SFC}} = -3516.319955345 \text{ Ha}$$

$$\nu_{\text{min}} = 21.92 \text{ cm}^{-1}$$

|    |          |           |           |
|----|----------|-----------|-----------|
| Cr | 3.184941 | 8.002069  | 3.383542  |
| C  | 4.343337 | 7.367622  | 4.670524  |
| C  | 4.208724 | 7.179083  | 2.091088  |
| C  | 4.244178 | 9.517062  | 3.211232  |
| O  | 5.035268 | 6.947927  | 5.487475  |
| O  | 4.814226 | 6.639514  | 1.275380  |
| O  | 4.914170 | 10.444689 | 3.103089  |
| B  | 1.734237 | 10.474393 | 4.947292  |
| C  | 1.845551 | 10.556168 | 6.519123  |
| H  | 0.967384 | 11.103162 | 6.906622  |
| H  | 2.729836 | 11.137872 | 6.827142  |
| H  | 1.880423 | 9.591005  | 7.041697  |
| C  | 1.619123 | 6.636652  | 4.198233  |
| C  | 1.547348 | 6.613969  | 2.786291  |
| C  | 1.415164 | 7.848157  | 2.091947  |
| H  | 1.402058 | 7.810844  | 0.999667  |
| C  | 1.410716 | 9.102612  | 2.734693  |
| C  | 1.494252 | 9.129733  | 4.178339  |
| C  | 1.571625 | 7.894731  | 4.857211  |
| H  | 1.684108 | 7.894229  | 5.943779  |
| C  | 1.747555 | 5.369394  | 5.000000  |
| H  | 0.797280 | 4.811539  | 4.998744  |
| H  | 2.010197 | 5.591377  | 6.043743  |
| H  | 2.523978 | 4.706964  | 4.592097  |
| C  | 1.593769 | 5.320684  | 2.018126  |
| H  | 0.637525 | 4.781385  | 2.113120  |
| H  | 2.389285 | 4.657033  | 2.384874  |
| H  | 1.776168 | 5.505139  | 0.950297  |
| B  | 1.514717 | 10.420012 | 1.876346  |
| C  | 1.403598 | 10.338181 | 0.304504  |
| H  | 2.281294 | 9.790358  | -0.082869 |
| H  | 0.518818 | 9.757207  | -0.003497 |
| H  | 1.369597 | 11.303308 | -0.218189 |
| C  | 1.629082 | 14.257754 | 2.625453  |
| C  | 1.700880 | 14.280433 | 4.037395  |
| C  | 1.833348 | 13.046262 | 4.731719  |
| H  | 1.846461 | 13.083560 | 5.824002  |

|    |           |           |          |
|----|-----------|-----------|----------|
| C  | 1.838039  | 11.791815 | 4.088958 |
| C  | 1.754489  | 11.764699 | 2.645316 |
| C  | 1.676854  | 12.999693 | 1.966459 |
| H  | 1.564354  | 13.000180 | 0.879892 |
| C  | 1.500357  | 15.524994 | 1.823703 |
| H  | 2.450507  | 16.083061 | 1.824958 |
| H  | 1.237754  | 15.302966 | 0.779959 |
| H  | 0.723789  | 16.187244 | 2.231624 |
| C  | 1.654193  | 15.573698 | 4.805579 |
| H  | 2.610305  | 16.113224 | 4.710550 |
| H  | 0.858503  | 16.237165 | 4.438872 |
| H  | 1.471883  | 15.389187 | 5.873414 |
| Cr | 0.063561  | 12.892002 | 3.440160 |
| C  | -1.095006 | 13.526285 | 2.153229 |
| C  | -0.960358 | 13.714736 | 4.732687 |
| C  | -0.995445 | 11.376819 | 3.612420 |
| O  | -1.787045 | 13.945883 | 1.336322 |
| O  | -1.565941 | 14.254148 | 5.548436 |
| O  | -1.665337 | 10.449120 | 3.720528 |

### 3-Cr<sub>2</sub>

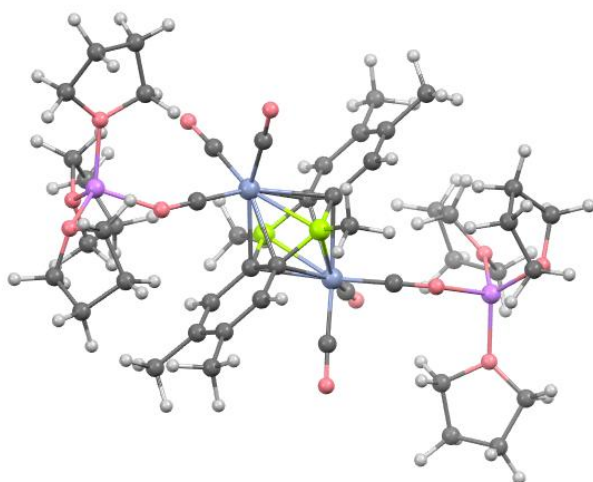

$$E_{\text{SFC}} = -4925.001827430 \text{ Ha}$$

$$\nu_{\text{min}} = 15.04 \text{ cm}^{-1}$$

|    |           |          |           |
|----|-----------|----------|-----------|
| Li | 16.375600 | 4.570160 | 27.321030 |
| Li | 23.912615 | 4.874898 | 18.407800 |
| Cr | 19.788295 | 5.210565 | 24.623910 |
| Cr | 20.368861 | 5.391521 | 21.140935 |
| O  | 17.541559 | 3.873356 | 25.964544 |
| C  | 18.455120 | 4.405526 | 25.409661 |
| O  | 19.515078 | 7.499903 | 26.485016 |
| C  | 19.631783 | 6.611738 | 25.735649 |
| O  | 21.542466 | 3.923690 | 26.648801 |
| C  | 20.883603 | 4.429997 | 25.839566 |

|   |           |          |           |
|---|-----------|----------|-----------|
| O | 18.726766 | 4.126771 | 19.011826 |
| C | 19.337837 | 4.632599 | 19.860114 |
| O | 20.713777 | 7.819583 | 19.472844 |
| C | 20.540073 | 6.883047 | 20.148323 |
| O | 22.712663 | 4.277081 | 19.773802 |
| C | 21.759416 | 4.734443 | 20.324629 |
| B | 19.374780 | 3.923876 | 22.694027 |
| B | 20.661855 | 6.739788 | 23.054776 |
| C | 18.661977 | 2.504162 | 22.495772 |
| H | 18.197817 | 2.425196 | 21.497371 |
| H | 17.856438 | 2.353775 | 23.236521 |
| H | 19.343338 | 1.646020 | 22.597723 |
| C | 21.259407 | 8.211662 | 23.259103 |
| H | 20.727241 | 8.745468 | 24.065073 |
| H | 21.154216 | 8.825048 | 22.346428 |
| H | 22.325412 | 8.223195 | 23.533966 |
| C | 18.542841 | 5.242996 | 22.624377 |
| C | 17.119673 | 5.185448 | 22.365459 |
| H | 16.667053 | 4.199204 | 22.215762 |
| C | 16.326964 | 6.290265 | 22.275272 |
| C | 16.920587 | 7.598495 | 22.459861 |
| C | 18.257911 | 7.687696 | 22.707349 |
| H | 18.702882 | 8.679843 | 22.837597 |
| C | 19.132987 | 6.538487 | 22.795145 |
| C | 21.491105 | 5.435247 | 23.123777 |
| C | 22.930147 | 5.477443 | 23.355005 |
| H | 23.394824 | 6.461206 | 23.476011 |
| C | 23.715924 | 4.375614 | 23.432461 |
| C | 23.104818 | 3.054967 | 23.302244 |
| C | 21.773010 | 2.965440 | 23.068650 |
| H | 21.324071 | 1.972072 | 22.976307 |
| C | 20.886715 | 4.119066 | 22.960727 |
| C | 14.855314 | 6.173384 | 21.976276 |
| H | 14.236583 | 6.592942 | 22.789402 |
| H | 14.563794 | 5.122302 | 21.836222 |
| H | 14.585058 | 6.723556 | 21.060142 |
| C | 16.058658 | 8.830351 | 22.367232 |
| H | 16.650667 | 9.739905 | 22.544638 |
| H | 15.236991 | 8.811711 | 23.104250 |
| H | 15.588615 | 8.921763 | 21.374087 |
| C | 23.953516 | 1.822587 | 23.477428 |
| H | 23.365860 | 0.911102 | 23.294028 |
| H | 24.358078 | 1.760821 | 24.501744 |
| H | 24.819808 | 1.810362 | 22.794890 |
| C | 25.201905 | 4.486482 | 23.653515 |
| H | 25.771568 | 4.040984 | 22.817439 |
| H | 25.521481 | 3.958681 | 24.567135 |
| H | 25.509908 | 5.538558 | 23.748168 |
| O | 17.421499 | 4.554090 | 28.953844 |

|   |           |          |           |
|---|-----------|----------|-----------|
| C | 17.133507 | 3.979137 | 30.229891 |
| H | 16.465000 | 3.115147 | 30.089951 |
| H | 16.606385 | 4.726469 | 30.850654 |
| C | 18.487924 | 3.614571 | 30.826280 |
| H | 18.799562 | 2.614122 | 30.485807 |
| H | 18.475343 | 3.611308 | 31.925696 |
| C | 19.396242 | 4.685139 | 30.223196 |
| H | 19.292732 | 5.634869 | 30.772935 |
| H | 20.459736 | 4.408804 | 30.215969 |
| C | 18.835244 | 4.813189 | 28.816108 |
| H | 18.967878 | 5.808594 | 28.365497 |
| H | 19.272114 | 4.063883 | 28.135869 |
| O | 15.895361 | 6.418753 | 26.976961 |
| C | 16.105088 | 7.069155 | 25.707156 |
| H | 15.225509 | 6.888887 | 25.064703 |
| H | 16.982747 | 6.611101 | 25.226521 |
| C | 16.310075 | 8.554372 | 26.017033 |
| H | 17.117954 | 8.979409 | 25.404473 |
| H | 15.389809 | 9.126572 | 25.815611 |
| C | 16.638945 | 8.566270 | 27.511816 |
| H | 16.367501 | 9.509302 | 28.008229 |
| H | 17.713750 | 8.385682 | 27.655780 |
| C | 15.833219 | 7.384391 | 28.025581 |
| H | 16.245772 | 6.917136 | 28.933181 |
| H | 14.778006 | 7.659416 | 28.215424 |
| O | 14.797366 | 3.449017 | 26.987352 |
| C | 15.081034 | 2.166224 | 26.424184 |
| H | 14.356074 | 1.434789 | 26.824091 |
| H | 16.092833 | 1.877324 | 26.740259 |
| C | 14.944174 | 2.328369 | 24.899690 |
| H | 15.925467 | 2.280624 | 24.407377 |
| H | 14.312702 | 1.533385 | 24.476332 |
| C | 14.311516 | 3.722783 | 24.728539 |
| H | 15.075224 | 4.448127 | 24.404979 |
| H | 13.494317 | 3.741329 | 23.992530 |
| C | 13.832940 | 4.062098 | 26.136639 |
| H | 13.818896 | 5.136471 | 26.368362 |
| H | 12.833992 | 3.633458 | 26.344579 |
| O | 24.563409 | 6.576632 | 19.031781 |
| C | 23.924718 | 7.753047 | 18.503625 |
| H | 22.900454 | 7.488437 | 18.194952 |
| H | 24.487251 | 8.092875 | 17.619451 |
| C | 23.907647 | 8.771629 | 19.639045 |
| H | 24.792961 | 9.426659 | 19.590259 |
| H | 23.004858 | 9.397281 | 19.604022 |
| C | 23.958269 | 7.883661 | 20.880911 |
| H | 22.957897 | 7.492270 | 21.119179 |
| H | 24.344901 | 8.398367 | 21.772640 |
| C | 24.854877 | 6.745443 | 20.425697 |

|   |           |          |           |
|---|-----------|----------|-----------|
| H | 25.927780 | 6.987439 | 20.542849 |
| H | 24.636242 | 5.799255 | 20.946831 |
| O | 25.118921 | 3.340607 | 18.357930 |
| C | 26.191250 | 3.352219 | 19.310982 |
| H | 26.045184 | 4.212090 | 19.987192 |
| H | 27.146062 | 3.491724 | 18.779700 |
| C | 26.109447 | 2.022435 | 20.062136 |
| H | 26.388623 | 2.128277 | 21.121178 |
| H | 26.787094 | 1.280014 | 19.610729 |
| C | 24.651260 | 1.611184 | 19.857001 |
| H | 24.482007 | 0.530721 | 19.970260 |
| H | 23.985924 | 2.147645 | 20.553186 |
| C | 24.397522 | 2.105158 | 18.443640 |
| H | 24.786146 | 1.401751 | 17.684027 |
| H | 23.338055 | 2.314361 | 18.234782 |
| O | 22.779853 | 5.019710 | 16.855317 |
| C | 23.157054 | 4.746571 | 15.505959 |
| H | 23.960360 | 3.992715 | 15.512827 |
| H | 23.551021 | 5.669458 | 15.042491 |
| C | 21.878451 | 4.283643 | 14.820498 |
| H | 21.717710 | 3.207781 | 14.997499 |
| H | 21.897702 | 4.451404 | 13.734047 |
| C | 20.820046 | 5.107768 | 15.552450 |
| H | 20.786965 | 6.133363 | 15.150737 |
| H | 19.807590 | 4.685479 | 15.489189 |
| C | 21.345083 | 5.107491 | 16.980976 |
| H | 21.091102 | 6.016937 | 17.546787 |
| H | 20.983960 | 4.236967 | 17.552005 |

$[3'-Cr_2]^{2-}$

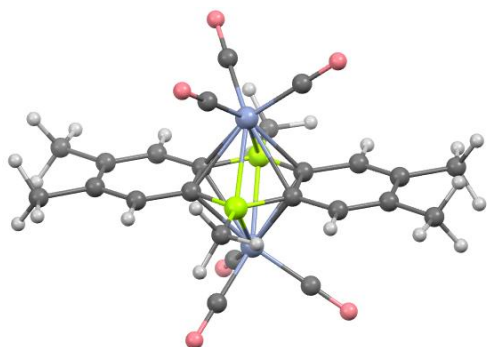

$E_{SFC} = -3516.3577171 \text{ Ha}$

$\nu_{\min} = 21.04 \text{ cm}^{-1}$

|    |           |          |           |
|----|-----------|----------|-----------|
| Cr | 19.766523 | 5.220413 | 24.646980 |
| Cr | 20.379587 | 5.376438 | 21.128485 |
| O  | 17.521828 | 3.748186 | 25.912380 |
| C  | 18.404306 | 4.335592 | 25.418369 |

|   |           |          |           |
|---|-----------|----------|-----------|
| O | 19.345959 | 7.576079 | 26.401518 |
| C | 19.503227 | 6.643760 | 25.712986 |
| O | 21.616894 | 4.087480 | 26.672737 |
| C | 20.888695 | 4.532436 | 25.875628 |
| O | 18.753527 | 3.997643 | 19.064482 |
| C | 19.392803 | 4.550455 | 19.873074 |
| O | 20.479570 | 7.882672 | 19.541708 |
| C | 20.434351 | 6.890877 | 20.159761 |
| O | 22.842892 | 4.435479 | 19.764454 |
| C | 21.874205 | 4.806861 | 20.300449 |
| B | 19.375048 | 3.920179 | 22.703850 |
| B | 20.672316 | 6.724820 | 23.057402 |
| C | 18.648163 | 2.500736 | 22.514330 |
| H | 18.182354 | 2.425685 | 21.515293 |
| H | 17.849337 | 2.363158 | 23.264997 |
| H | 19.329870 | 1.640613 | 22.614416 |
| C | 21.285431 | 8.199078 | 23.230152 |
| H | 20.810587 | 8.727866 | 24.076057 |
| H | 21.117233 | 8.805674 | 22.322138 |
| H | 22.370888 | 8.204083 | 23.420406 |
| C | 18.552206 | 5.241078 | 22.618542 |
| C | 17.129250 | 5.193454 | 22.363987 |
| H | 16.668310 | 4.207992 | 22.235264 |
| C | 16.341215 | 6.300308 | 22.275961 |
| C | 16.944023 | 7.604564 | 22.444115 |
| C | 18.281794 | 7.686614 | 22.683945 |
| H | 18.733932 | 8.676401 | 22.810602 |
| C | 19.150230 | 6.534230 | 22.782574 |
| C | 21.489386 | 5.420194 | 23.139849 |
| C | 22.924776 | 5.455636 | 23.390169 |
| H | 23.390814 | 6.438261 | 23.518337 |
| C | 23.708086 | 4.354247 | 23.471058 |
| C | 23.099709 | 3.037417 | 23.302071 |
| C | 21.768188 | 2.952924 | 23.071203 |
| H | 21.322180 | 1.960760 | 22.945320 |
| C | 20.881514 | 4.105643 | 22.974409 |
| C | 14.862300 | 6.187190 | 22.007021 |
| H | 14.262260 | 6.630848 | 22.821163 |
| H | 14.564993 | 5.132526 | 21.905897 |
| H | 14.573465 | 6.710094 | 21.078117 |
| C | 16.089373 | 8.842888 | 22.352673 |
| H | 16.698338 | 9.747216 | 22.501848 |
| H | 15.288655 | 8.845394 | 23.113298 |
| H | 15.593795 | 8.927464 | 21.369385 |
| C | 23.962049 | 1.804470 | 23.385487 |
| H | 23.357334 | 0.896459 | 23.238438 |
| H | 24.464262 | 1.719948 | 24.365614 |
| H | 24.756941 | 1.807529 | 22.618528 |
| C | 25.188829 | 4.460866 | 23.729710 |

|   |           |          |           |
|---|-----------|----------|-----------|
| H | 25.781446 | 4.019979 | 22.908409 |
| H | 25.483105 | 3.933723 | 24.654694 |
| H | 25.490747 | 5.514411 | 23.833239 |

## References

1. E. Kumarasamy, S. N. Sanders, A. B. Pun, S. A. Vaselabadi, J. Z. Low, M. Y. Sfeir, M. L. Steigerwald, G. E. Stein and L. M. Campos, *Macromolecules*, 2016, **49**, 1279–1285.
2. D. P. Tate, W. R. Knipple and J. M. Augl, *Inorg. Chem.*, 1962, **1**, 433–434.
3. G. Sheldrick, *Acta Cryst. A*, 2015, **71**, 3–8.
4. G. Sheldrick, *Acta Cryst. A*, 2008, **64**, 112–122.
5. TURBOMOLE V7.9, A development of University of Karlsruhe, Forschungszentrum Karlsruhe GmbH, 1989–2007, TURBOMOLE GmbH, 2007, <http://www.turbomole.com.TmoleX2024>.
6. TmoleX2024. Dassault Systèmes: Versailles.
7. J.-D. Chai and M. Head-Gordon, *J. Chem. Phys.*, 2008, **128**, article 084106.
8. E. Caldeweyher, S. Ehlert, A. Hansen, H. Neugebauer, S. Spicher, C. Bannwarth and S. Grimme, *J. Chem. Phys.*, 2019, **150**, article 154122.
9. a) F. Weigend, *Phys. Chem. Chem. Phys.*, 2006, **8**, 1057–1065; b) F. Weigend and R. Ahlrichs, *Phys. Chem. Chem. Phys.*, 2005, **7**, 3297–3305.
10. a) A. D. Becke, *J. Chem. Phys.*, 1993, **98**, 5648–5652; b) C. Lee, W. Yang and R. G. Parr, *Phys. Rev. B*, 1988, **37**, 785–789; c) S. H. Vosko, L. Wilk and M. Nusair, *Can. J. Phys.*, 1980, **58**, 1200–1211; d) P. J. Stephens, F. J. Devlin, C. F. Chabalowski and M. J. Frisch, *J. Phys. Chem.* 1994, **98**, 11623–11627.
11. K. B. Wiberg, *Tetrahedron*, 1968, **24**, 1083–1096.
12. A. E. Reed, R. B. Weinstock and F. Weinhold, *J. Chem. Phys.* 1985, **83**, 735–746.
13. R. F. W. Bader, *Int. Ser. Monogr. Chem.*, Oxford University Press: Oxford, UK, 1990, Vol. 22.
14. G. Knizia, *J. Chem. Theory Comput.*, 2013, **9**, 4834–4843.
15. a) Z. Chen, C. S. Wannere, C. Corminboeuf, R. Puchta and P. von Ragué Schleyer, *Chem. Rev.*, 2005, **105**, 3842–3888; b) A. Stanger, *J. Org. Chem.*, 2006, **71**, 883–893.
16. a) A. D. Becke, *J. Chem. Phys.*, 1993, **98**, 5648–5652; b) A. D. Becke, *Phys. Rev. A*, 1988, **38**, 3098–3099.
